# Supplementary material for: Re-evaluating the Green versus Red Signal in Eukaryotes with Secondary Plastid of Red Algal Origin
Source: Oxford University Press journal article supplement (doi:10.1093/gbe/evs049), 2012-01-01

JO786647: Signal recognition particle-docking protein

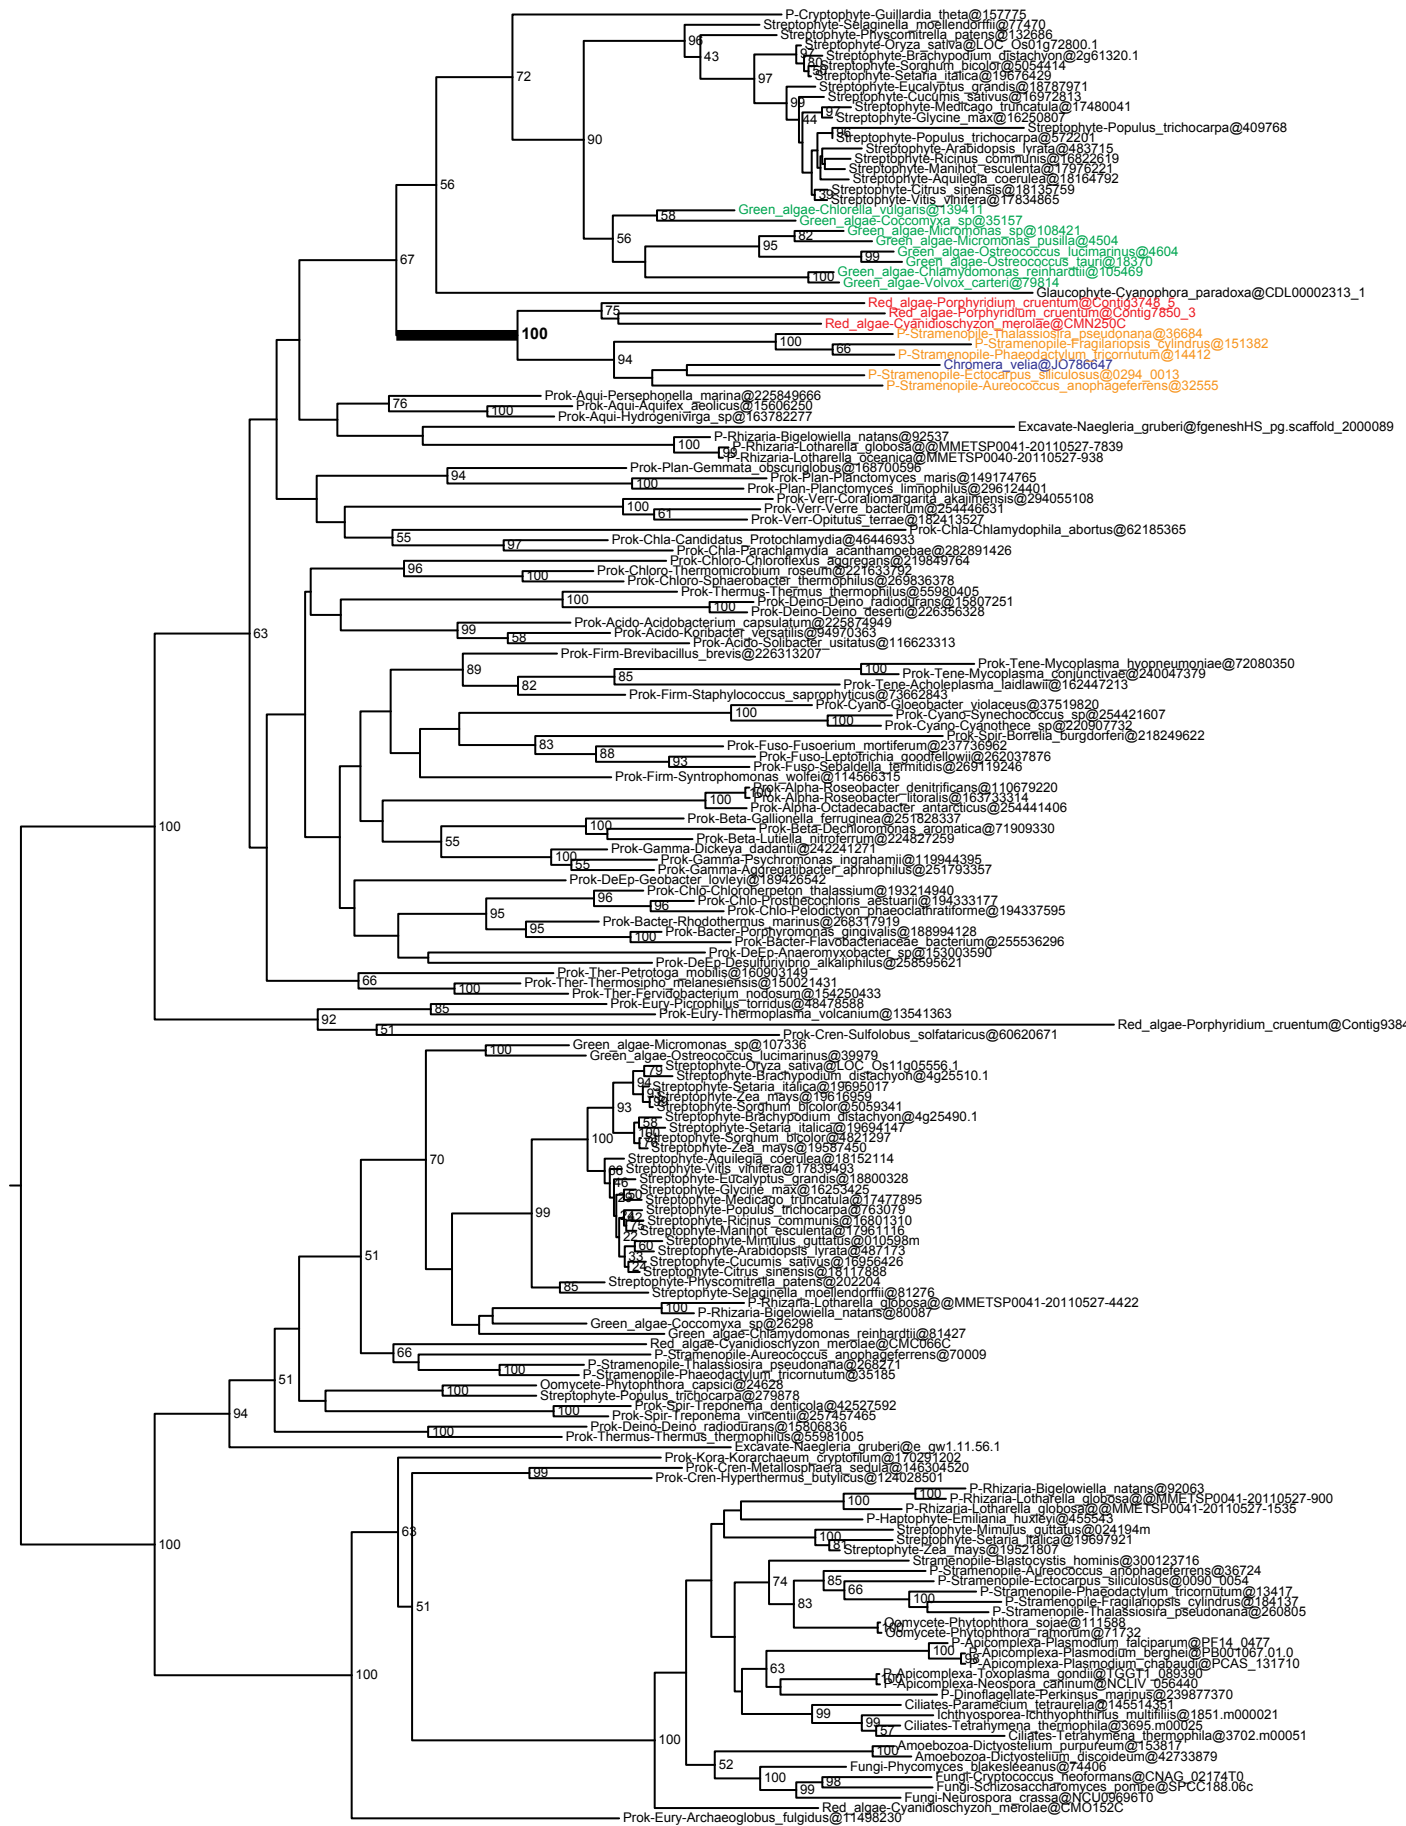

JO786663: No function prediction

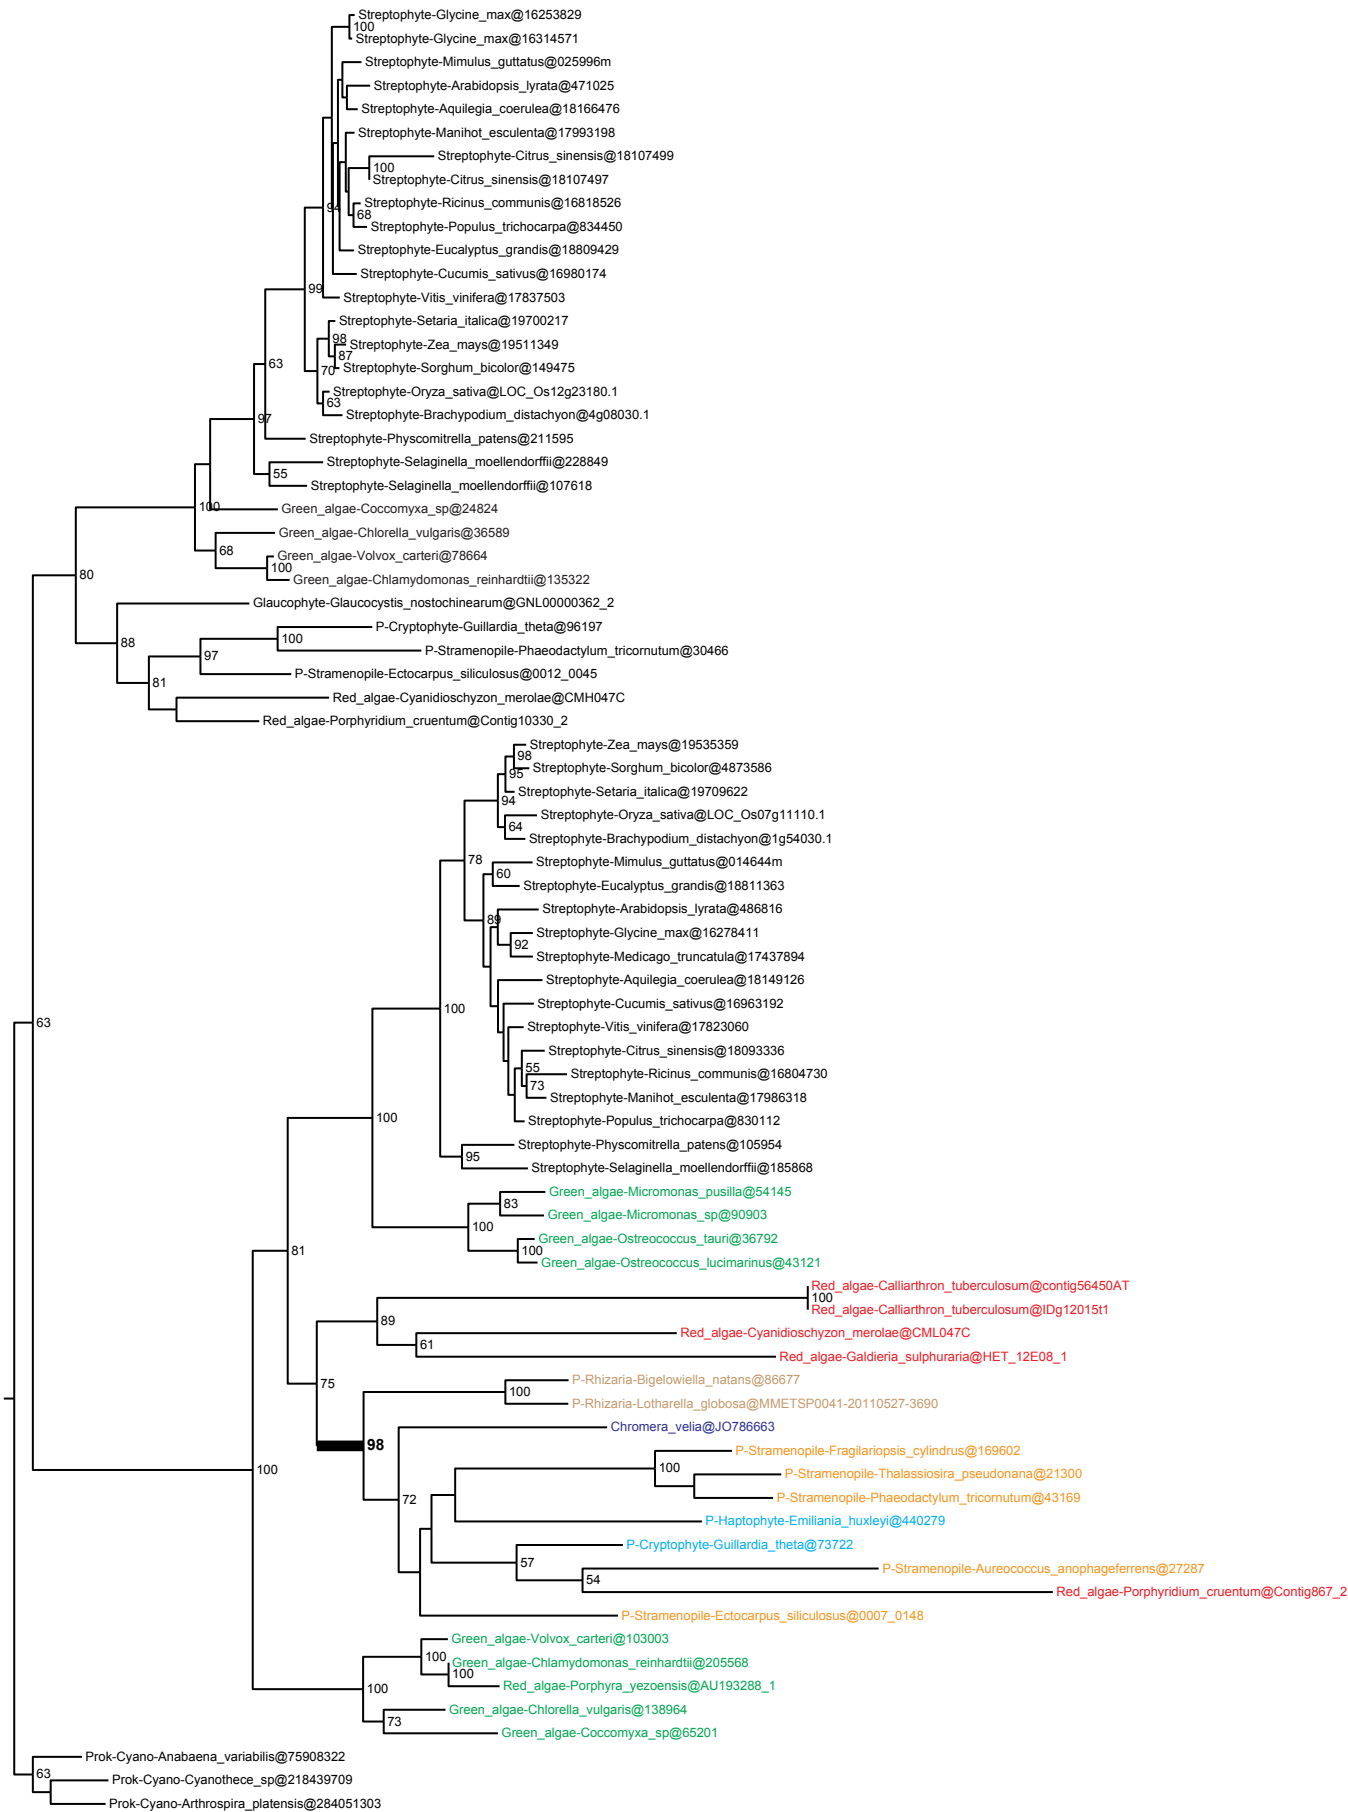

JO786667: Ferredoxin (2fe-2s)

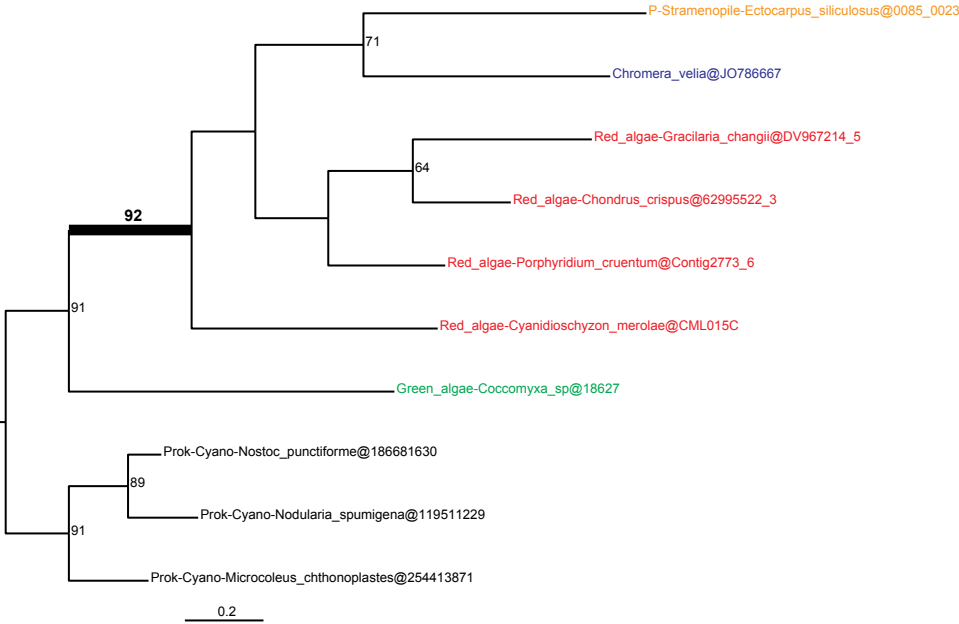

Phylogenetic tree of the 1000 most abundant OTUs from the 16S rRNA sequencing data. The tree is rooted at the bottom left and branches upwards and to the right. It shows a wide variety of bacterial and archaeal taxa, with major groups like Proteobacteria, Bacteroidetes, Firmicutes, and Actinobacteria being prominent. Bootstrap values are indicated at many nodes, and OTU identifiers are listed at the tips of the branches. The tree is color-coded by phylum: Proteobacteria (red), Bacteroidetes (green), Firmicutes (blue), Actinobacteria (orange), and other groups (grey).

# JO786681: ATP-dependent clp protease proteolytic subunit

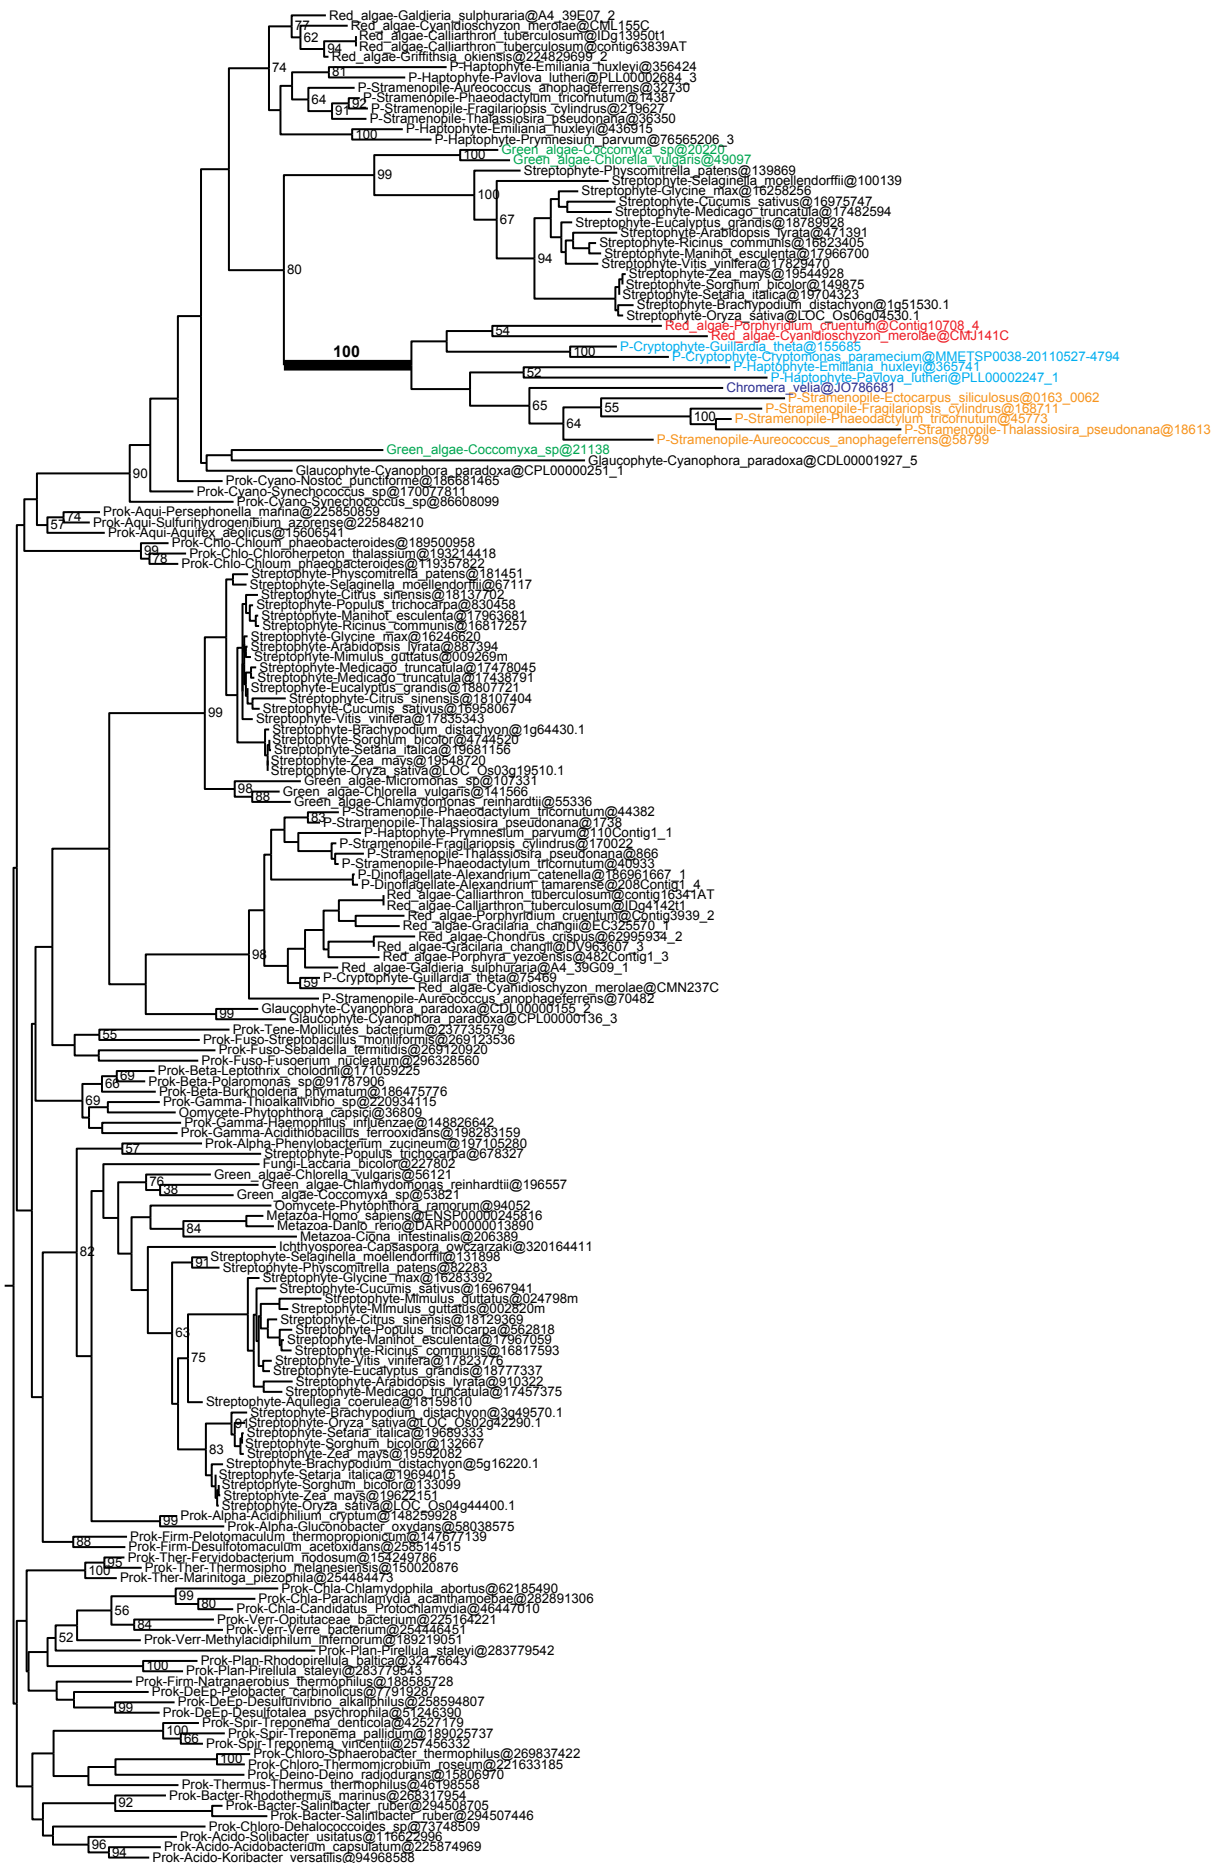

JO786683: Integral membrane protein

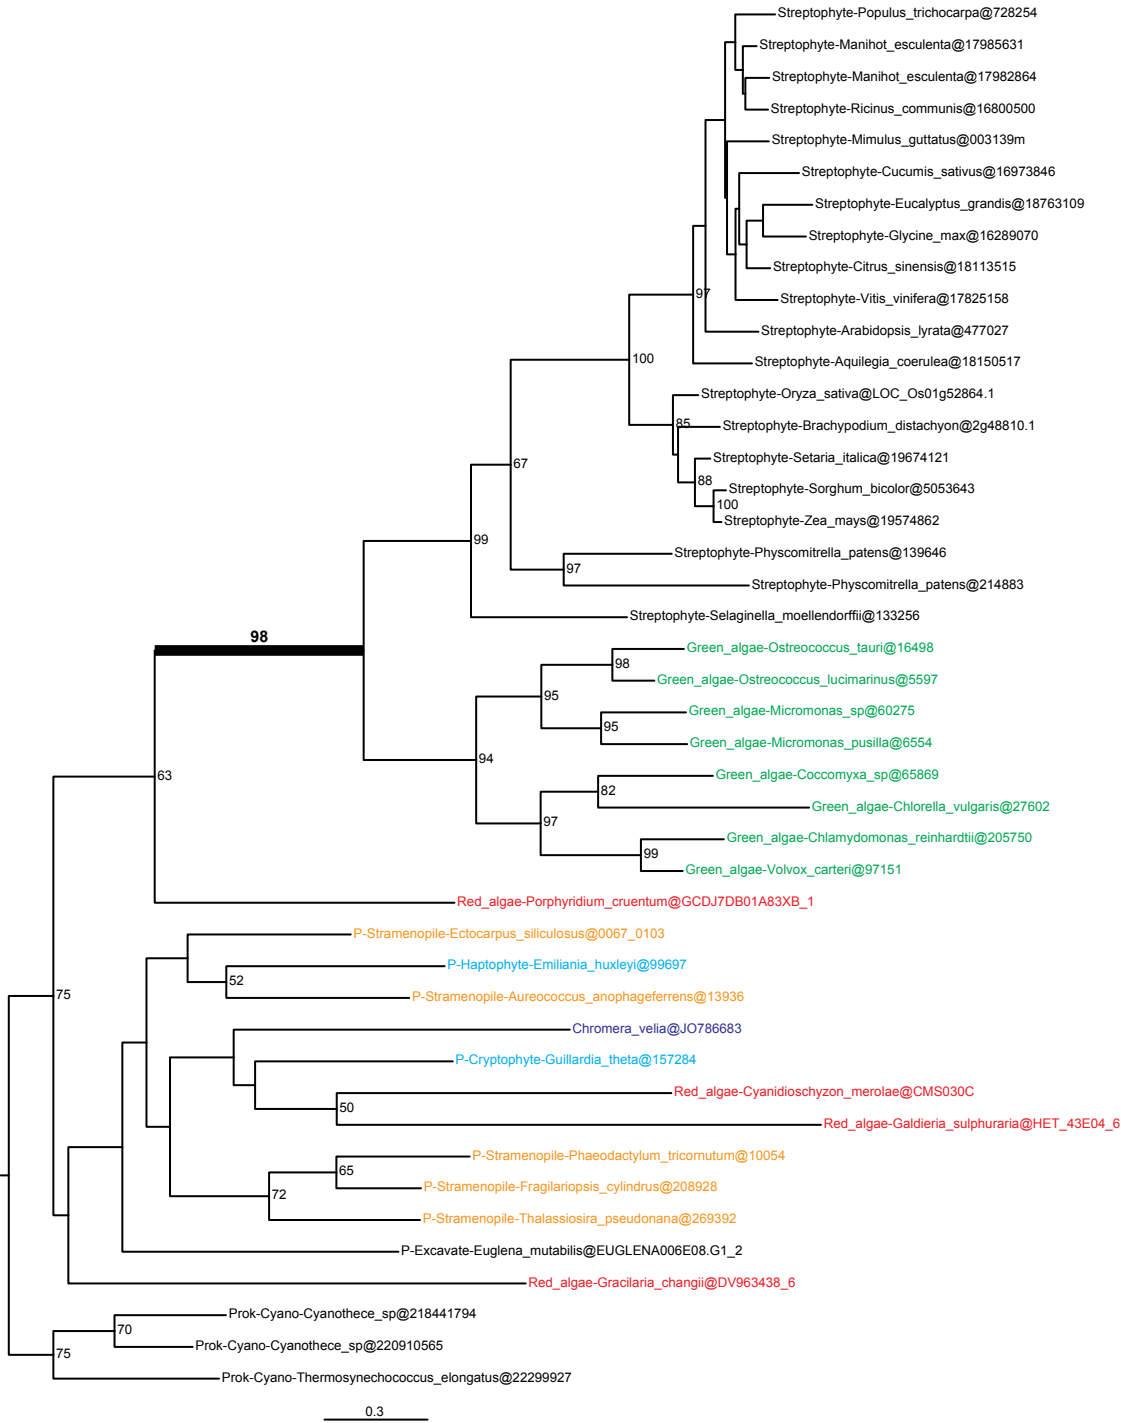

# JO786744: Fructosamine kinase

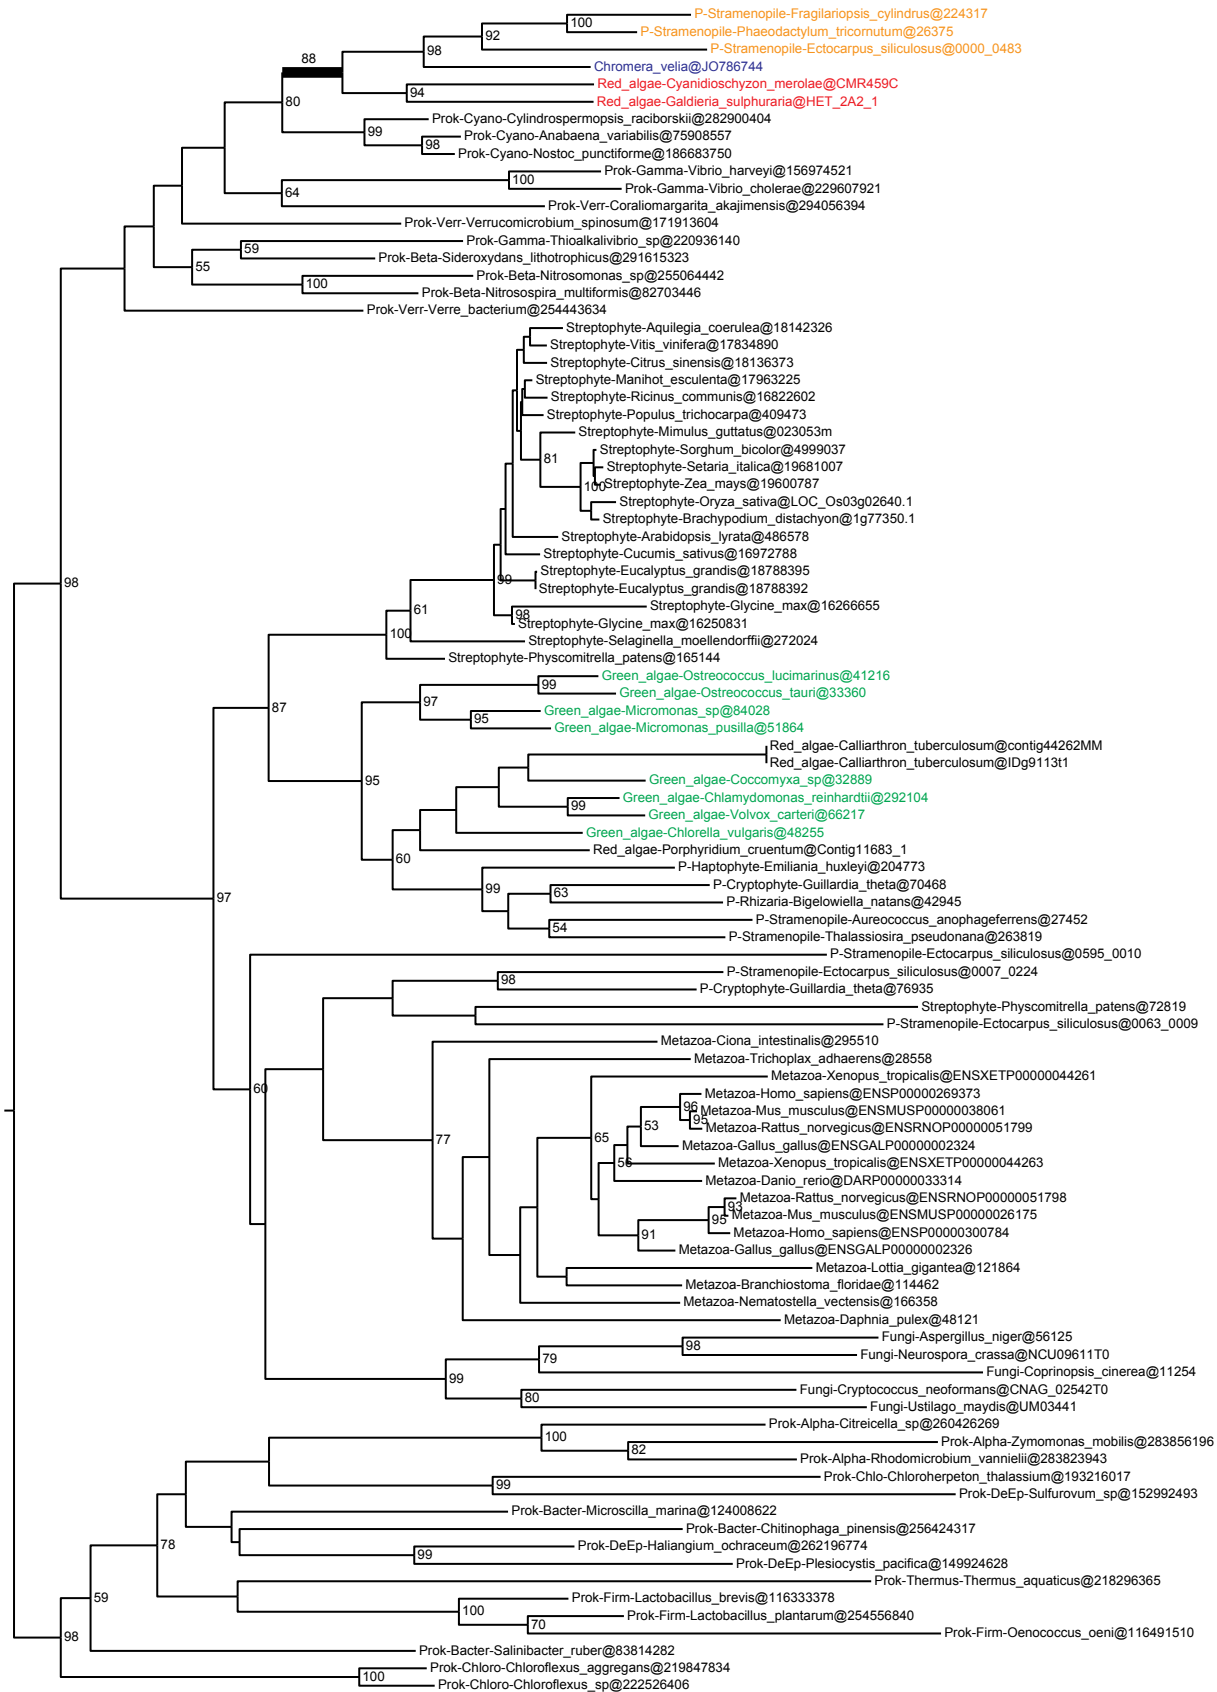

0.3

# JO786766: Tyrosyl-tRNA synthetase

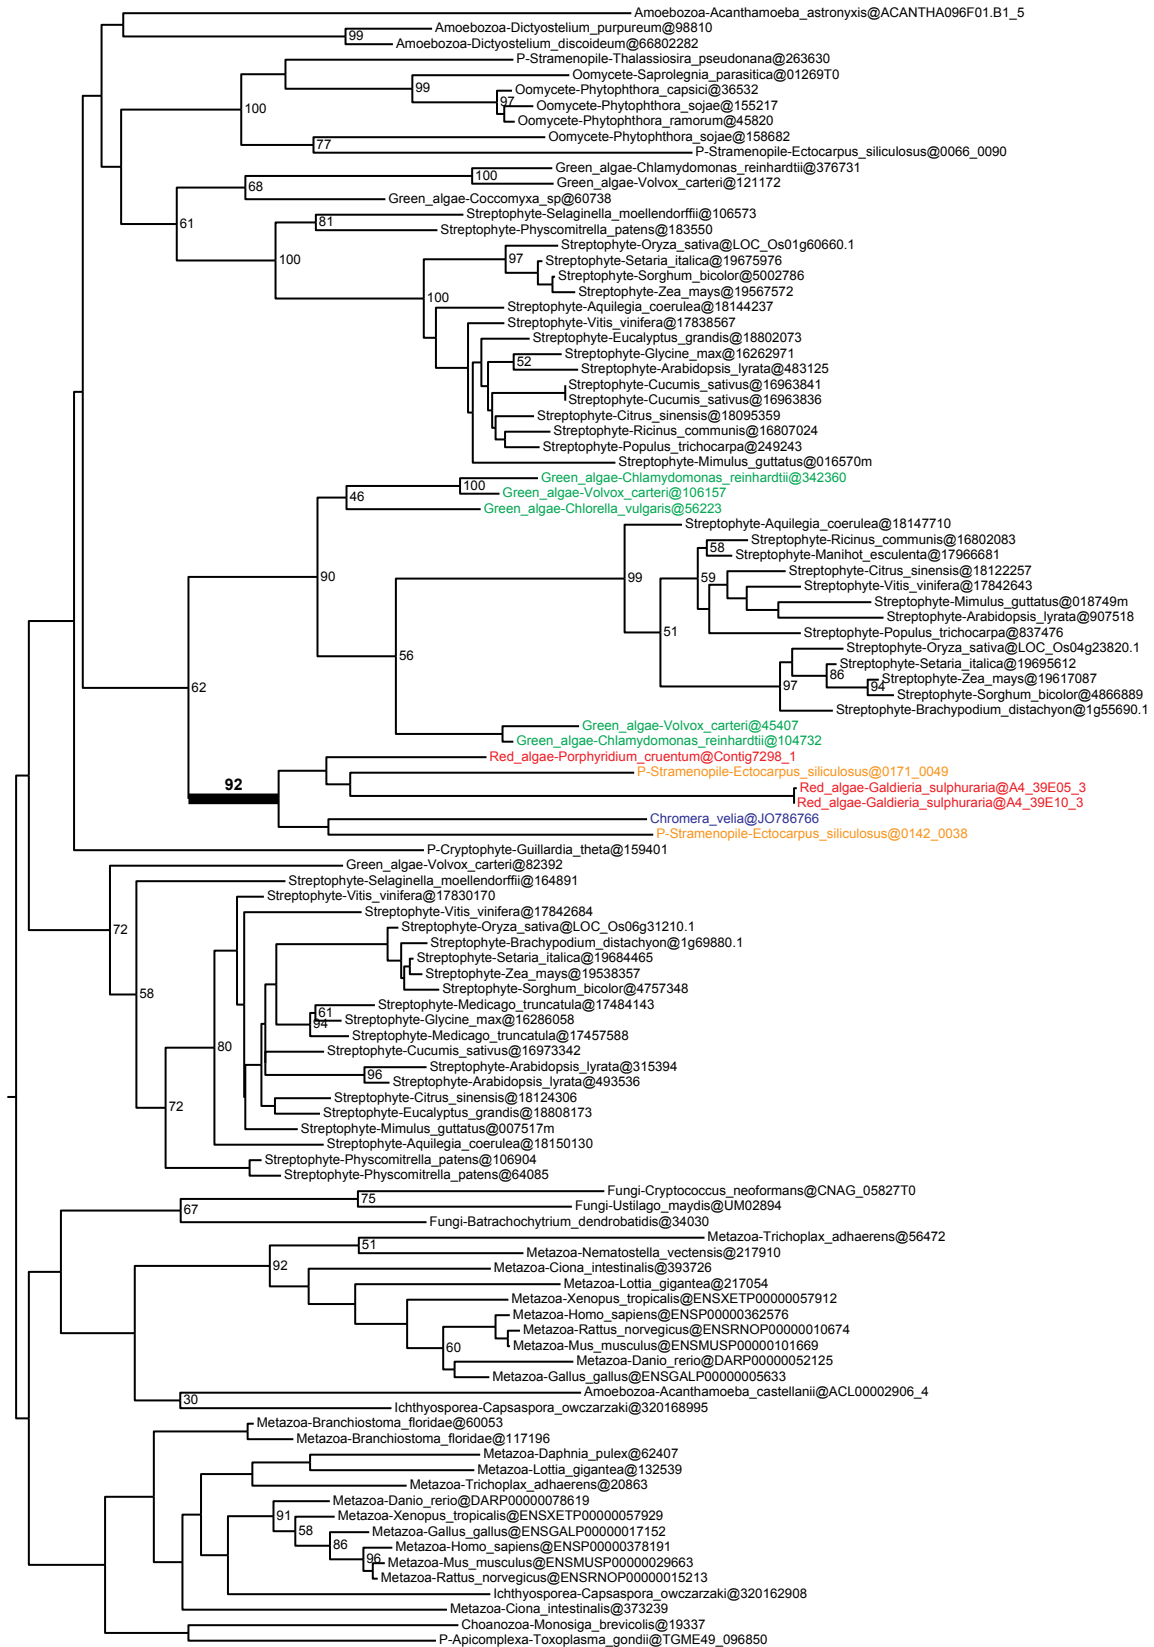

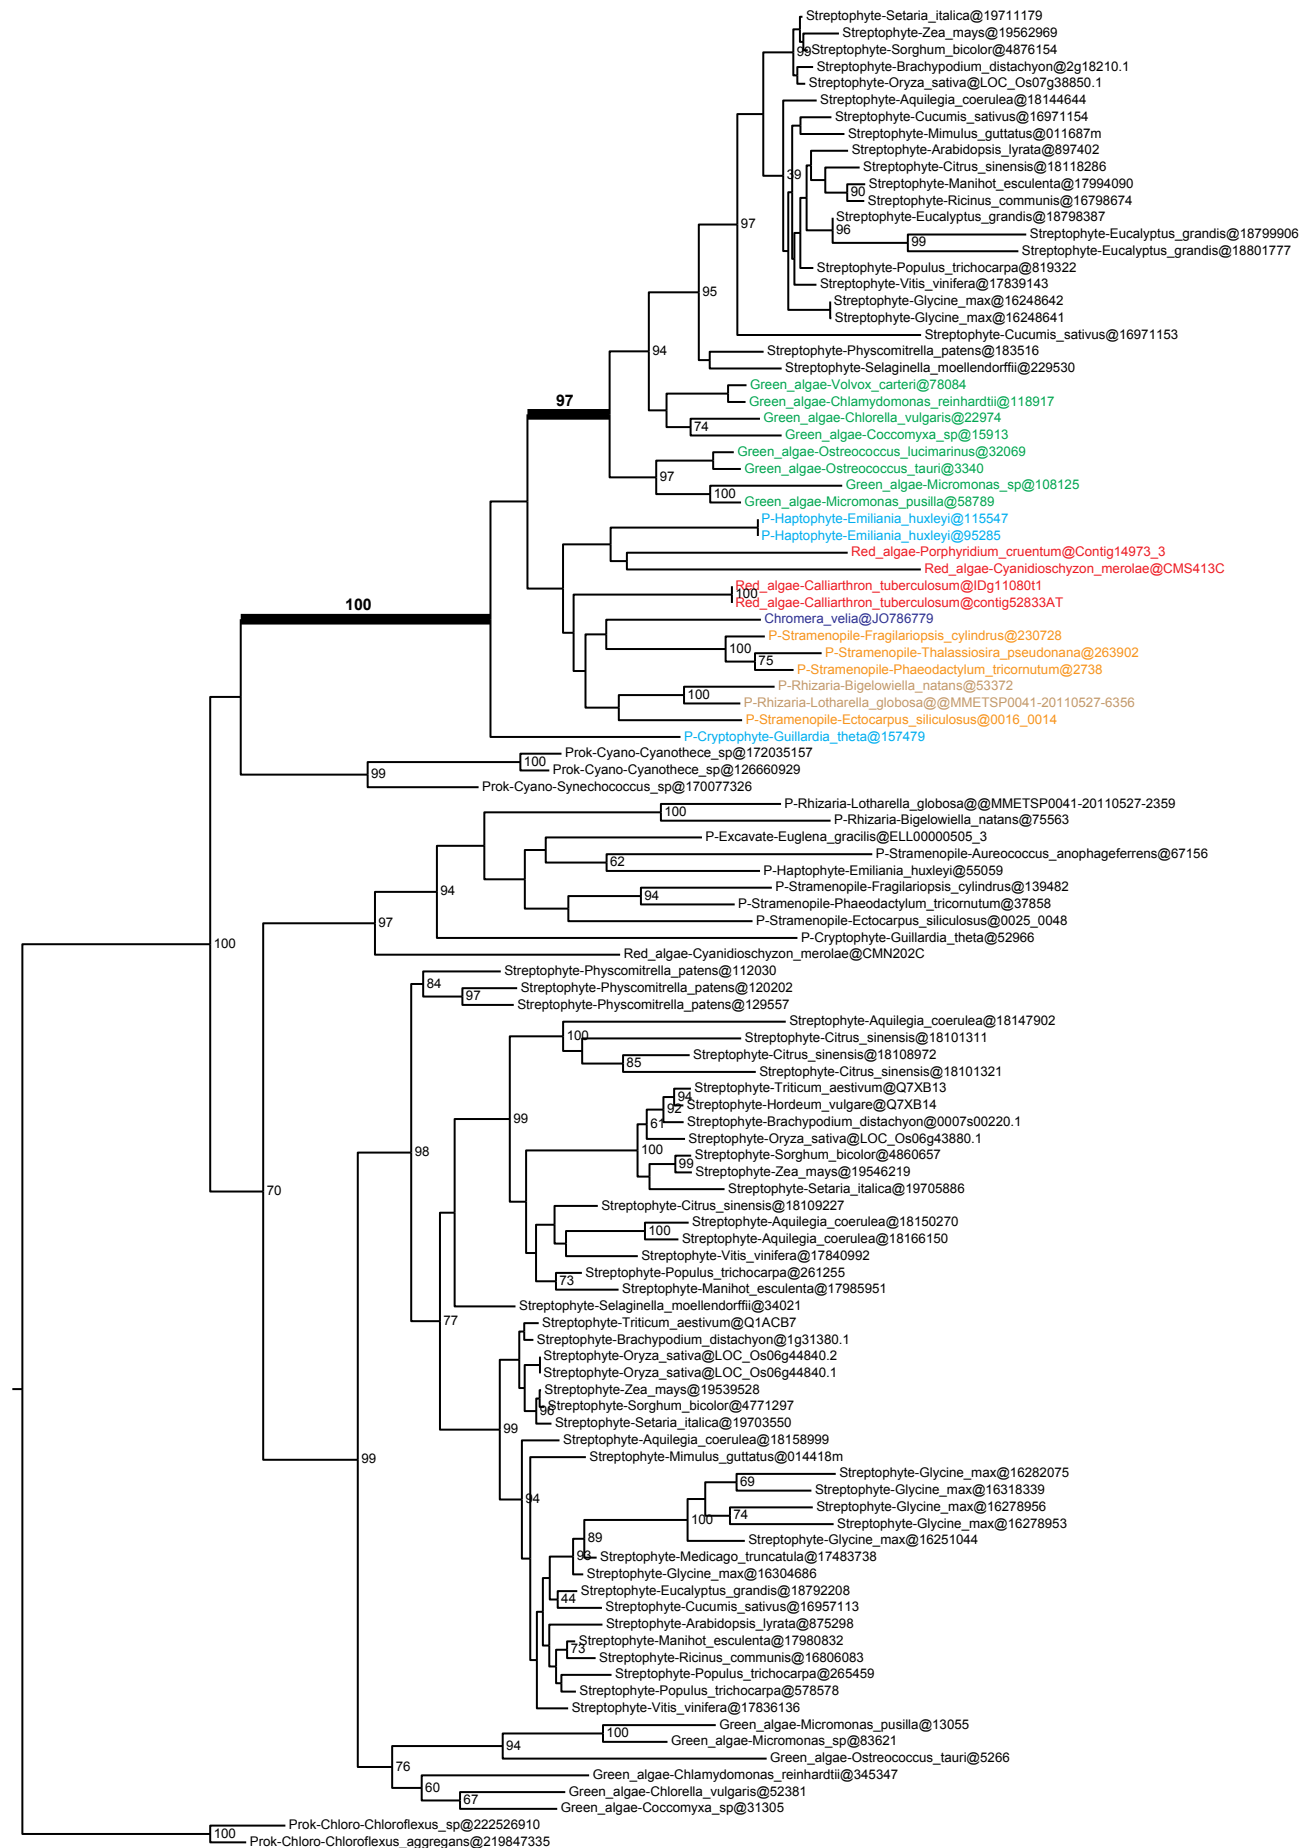

JO789192: Glycerol-3-phosphate dehydrogenase

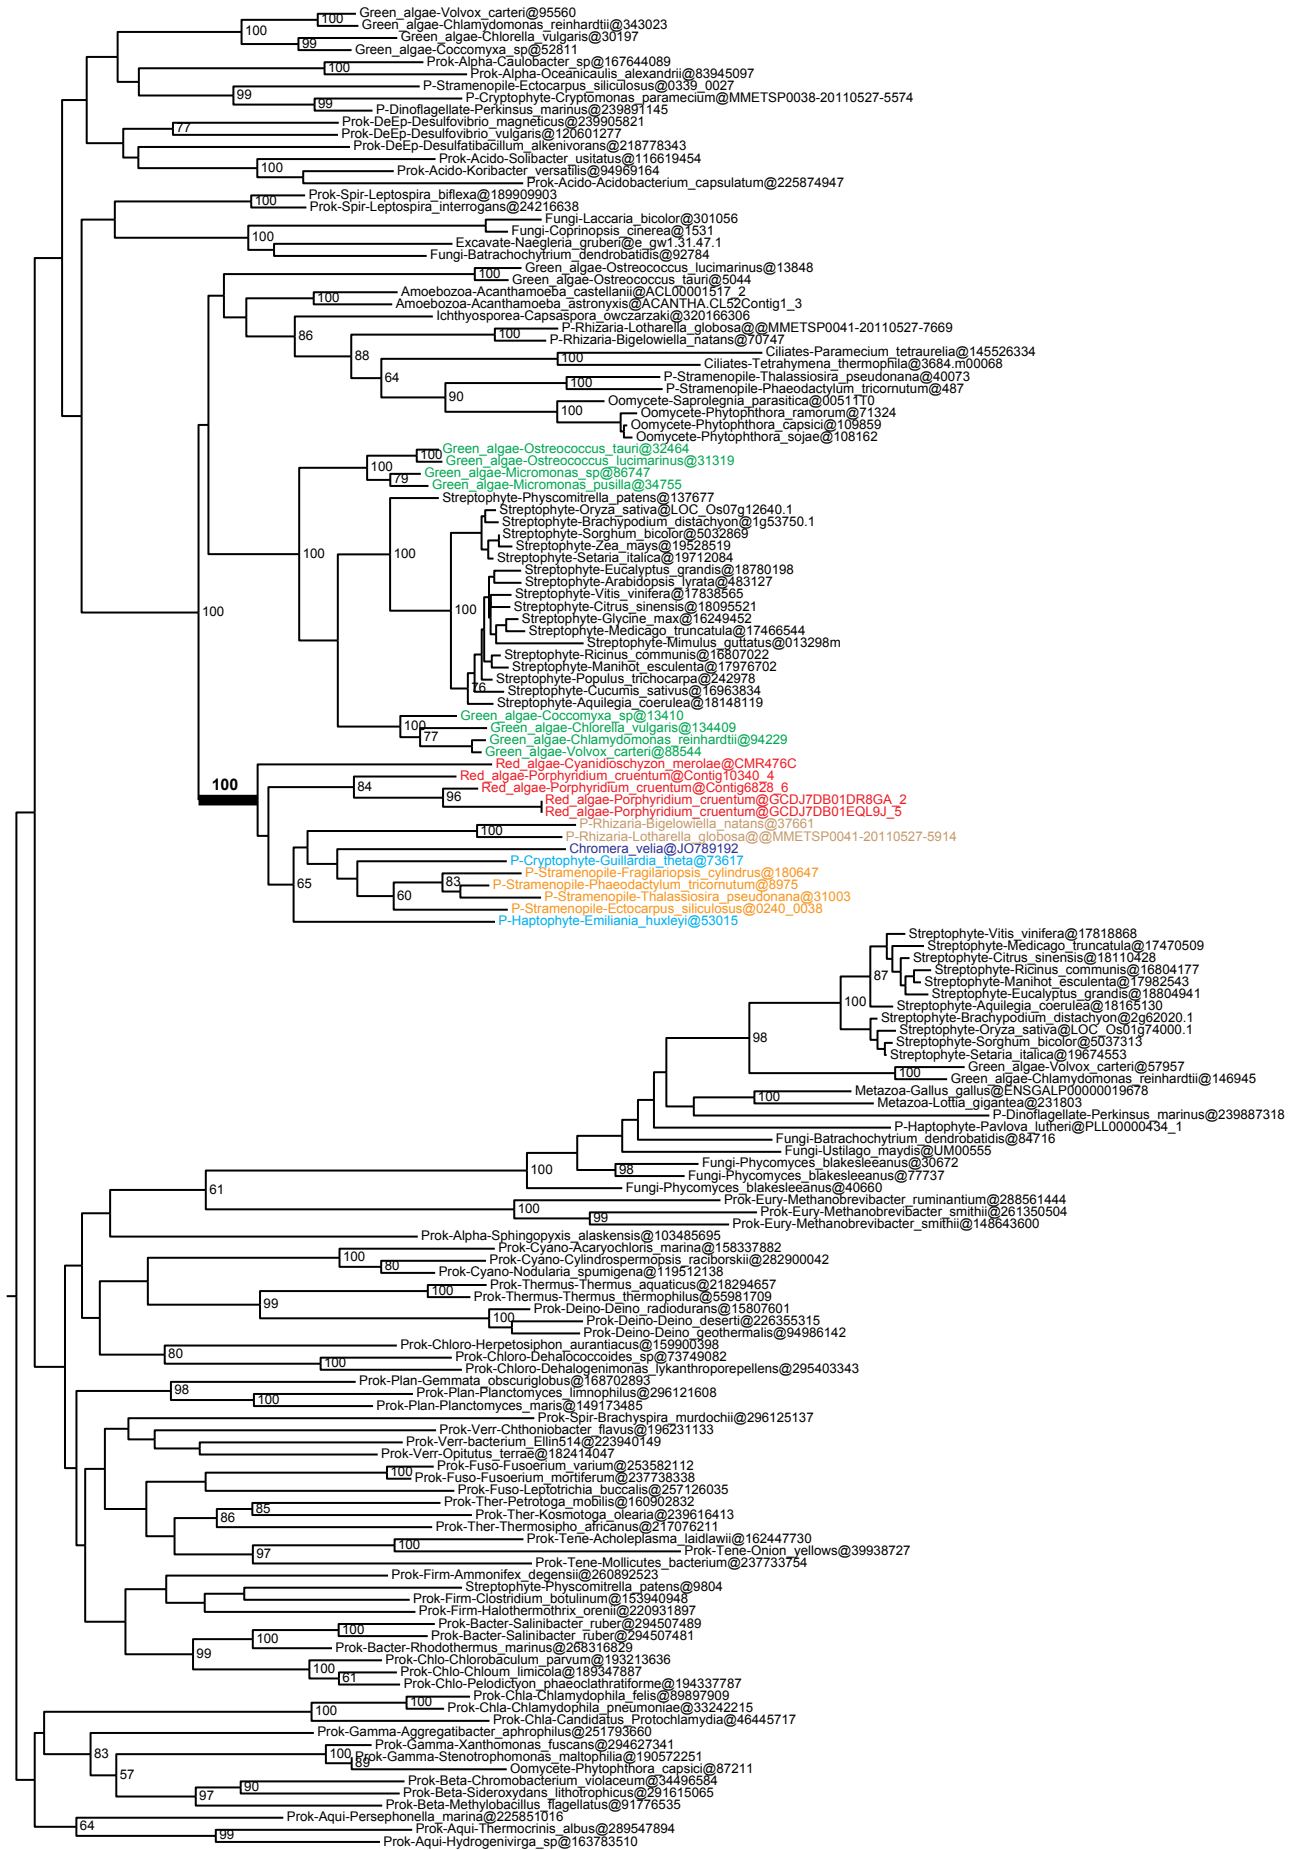

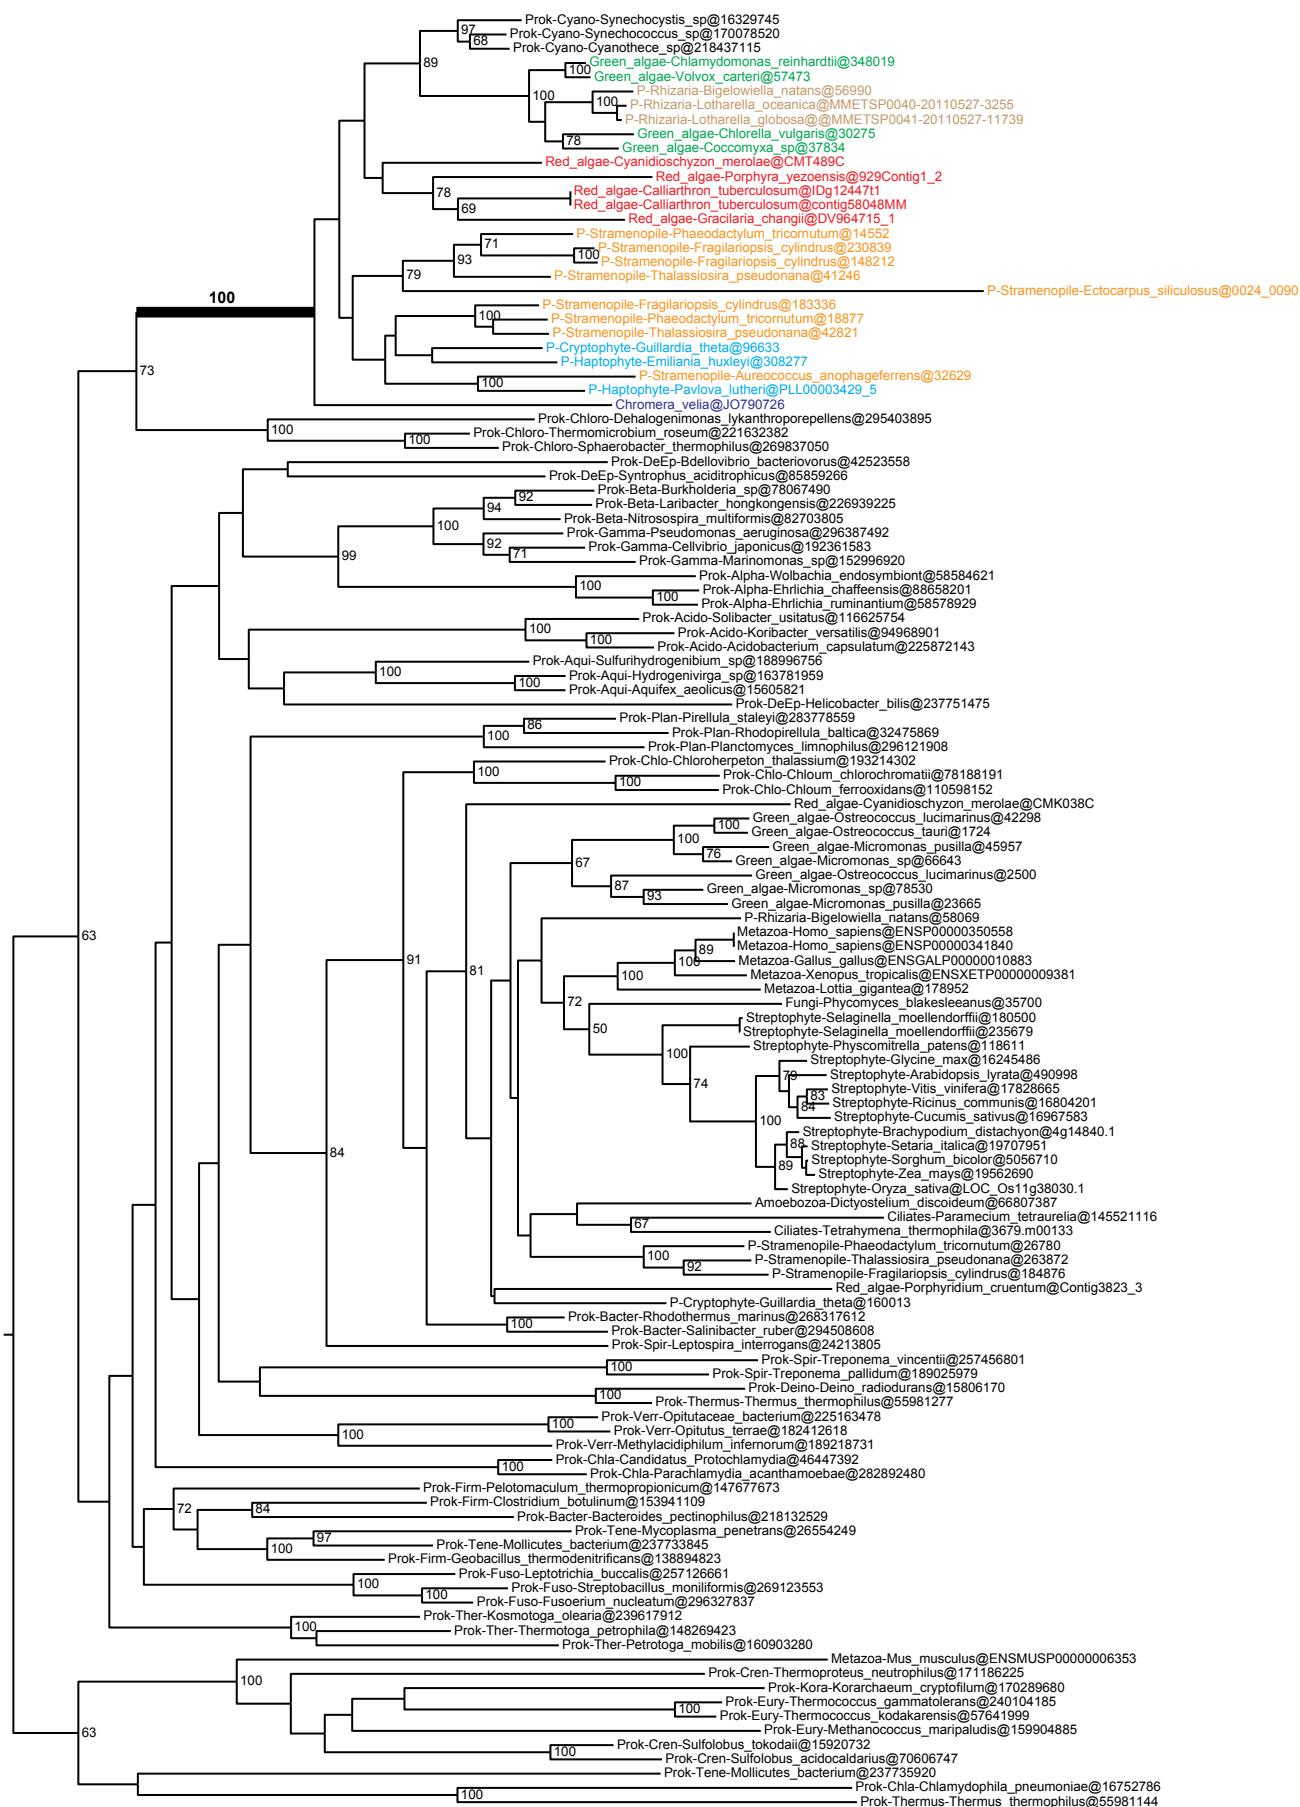

## JO792696: Nad-dependent epimerase dehydratase

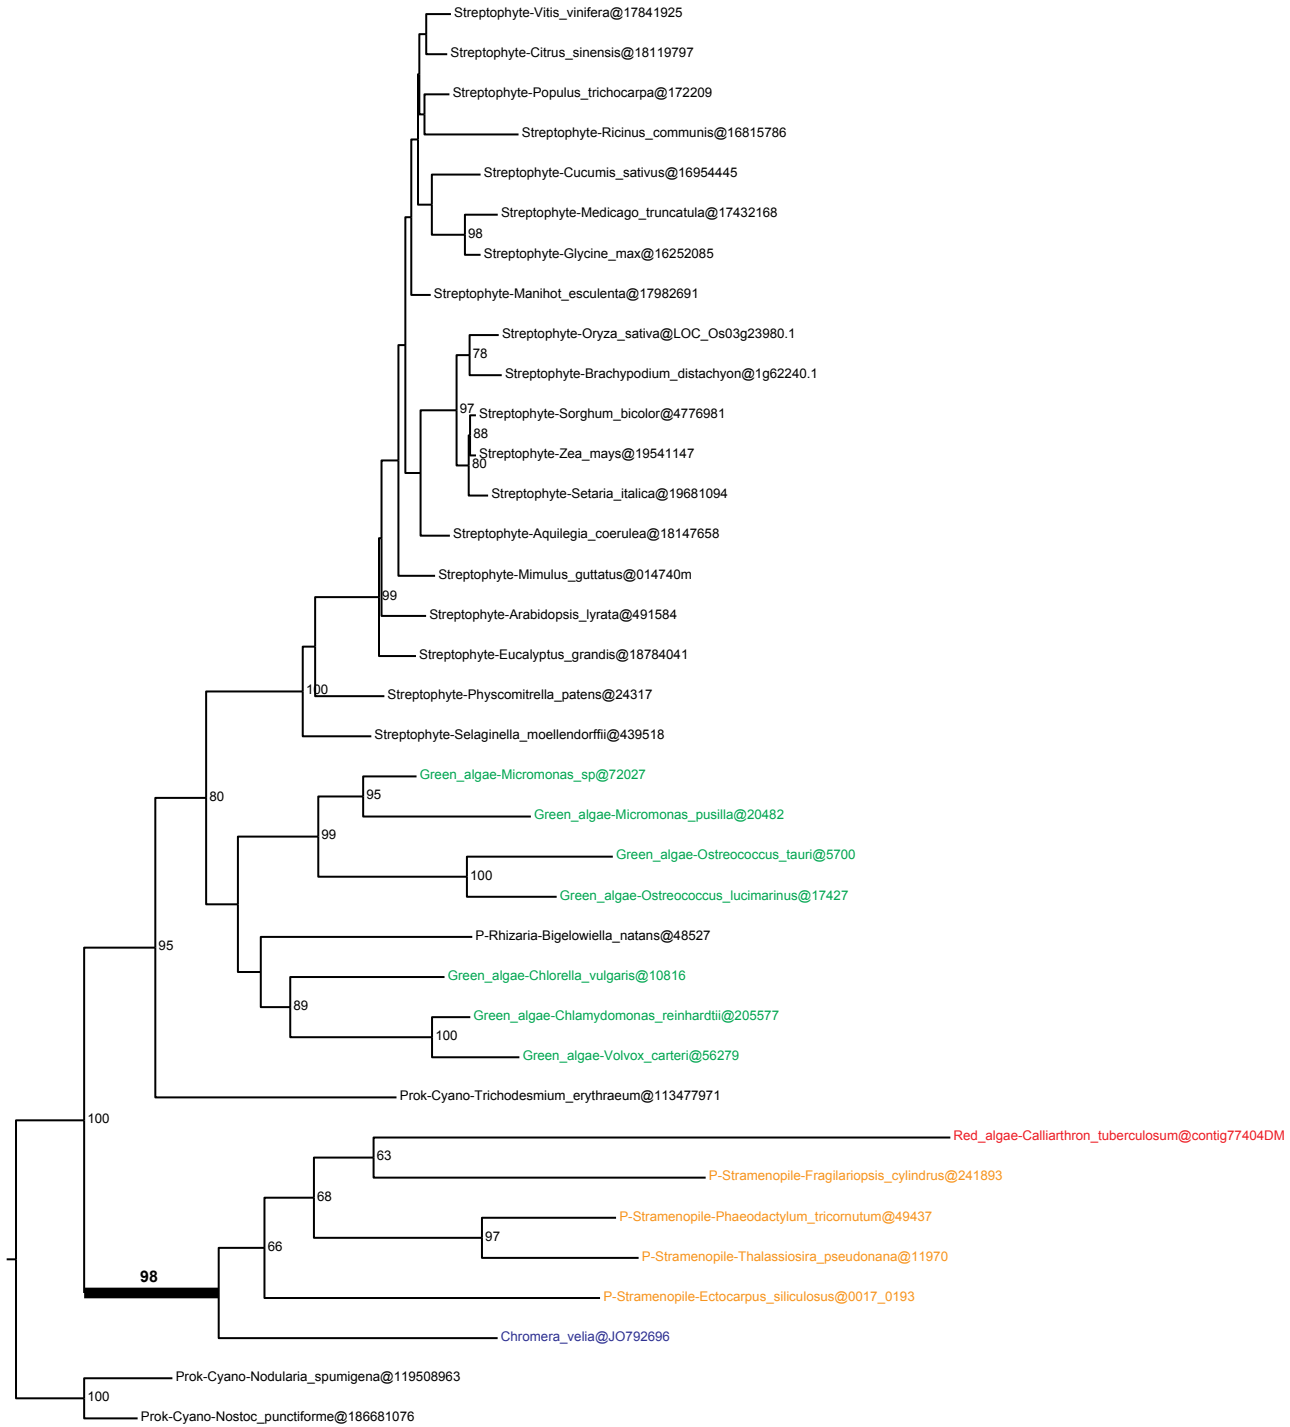

# JO793833: Fe-s metabolism associated

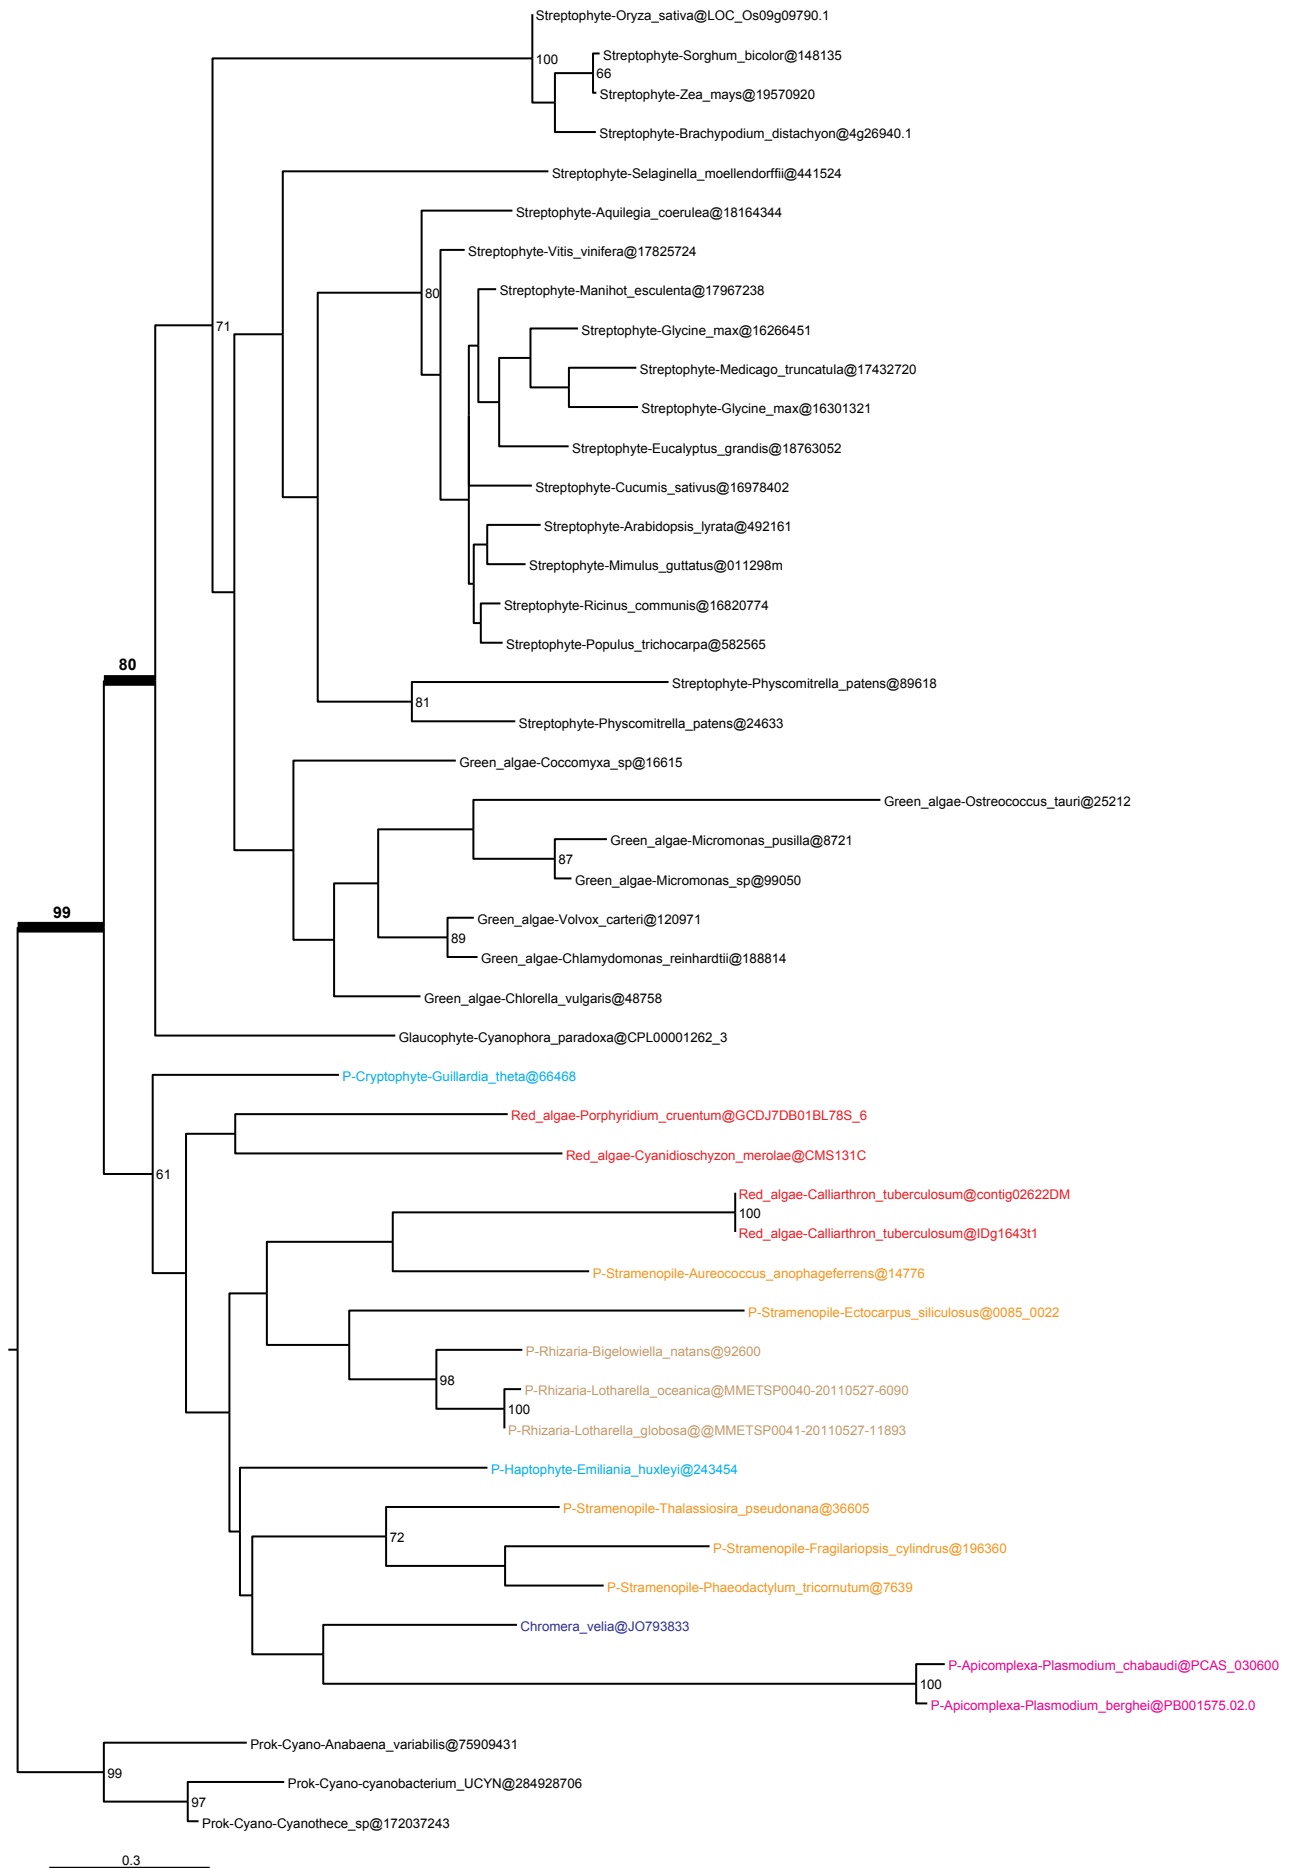

JO794159: Oxygen-evolving enhancer protein

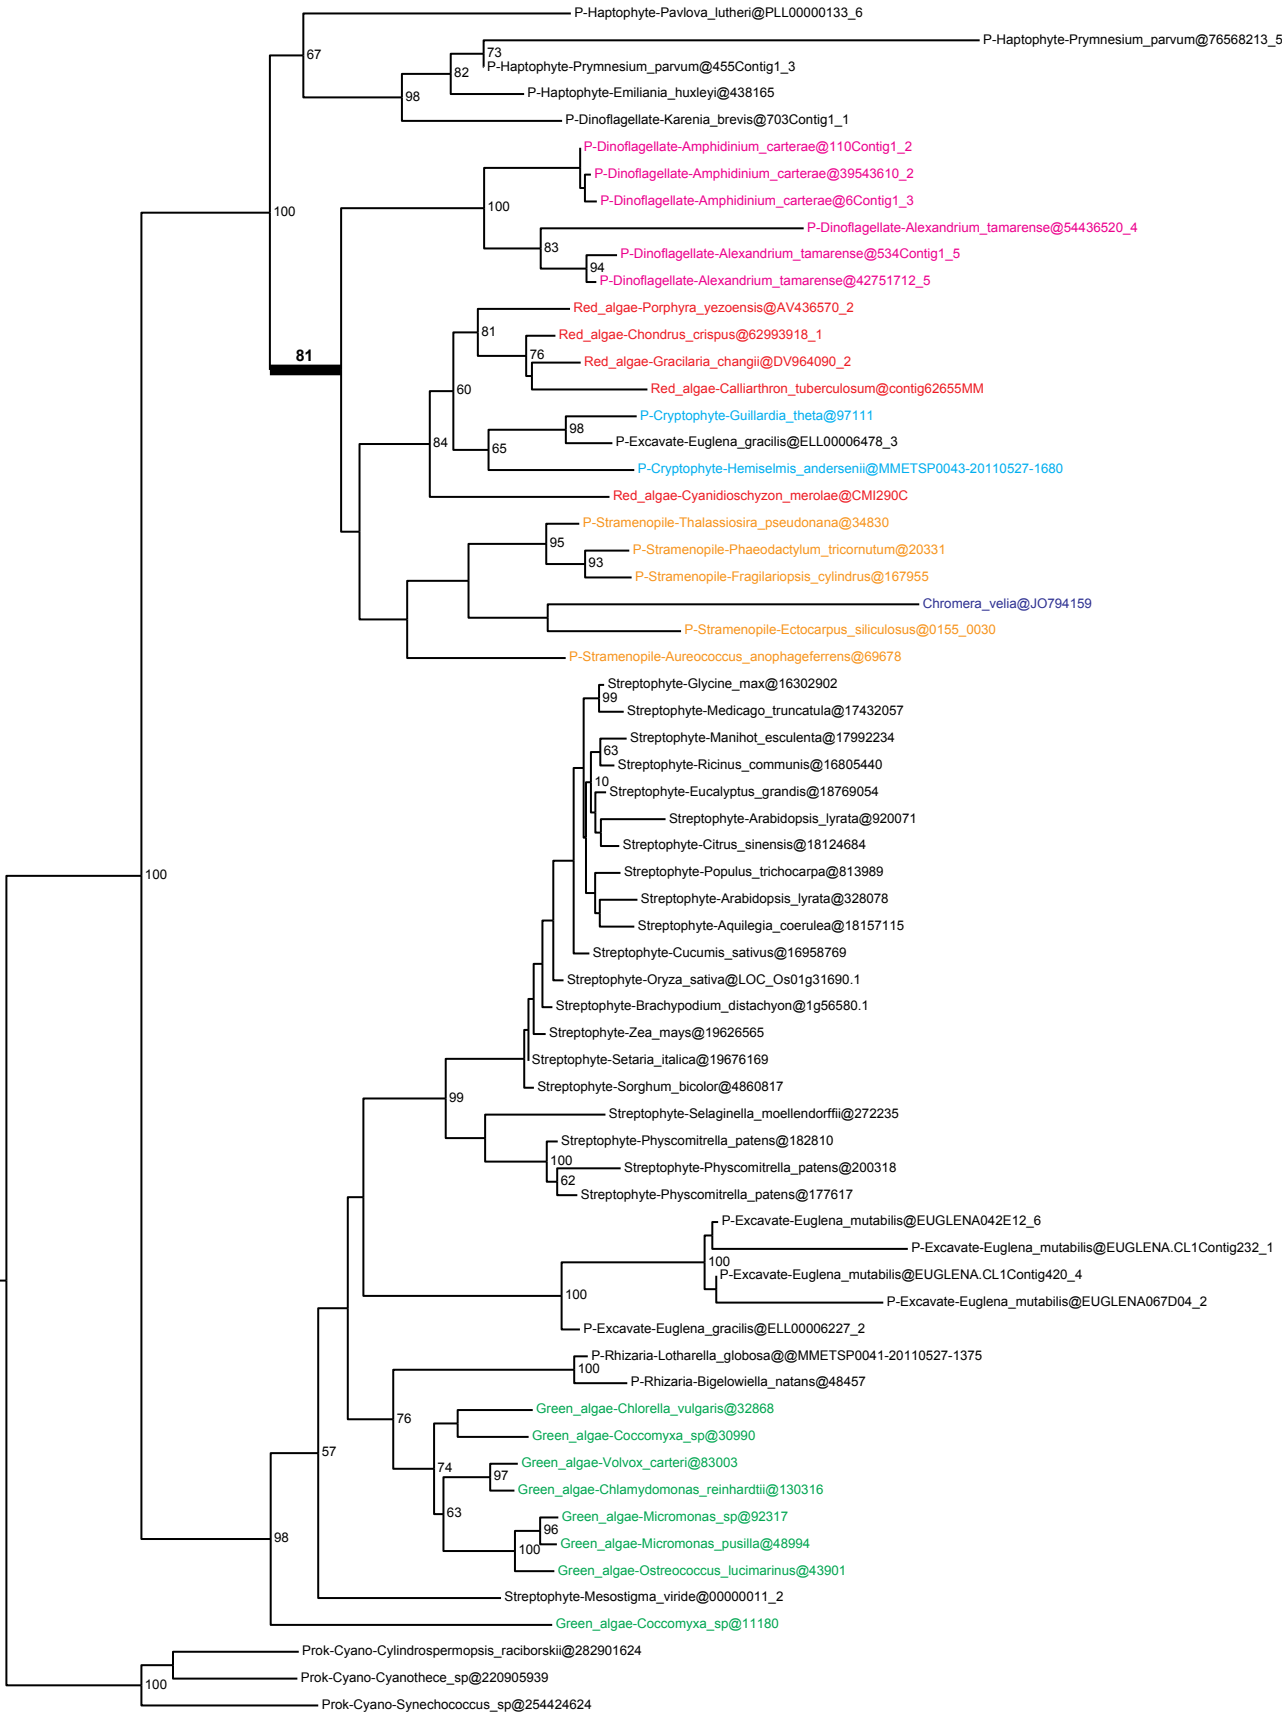

# JO795745: Aspartyl glutamyl-trna amidotransferase subunit b

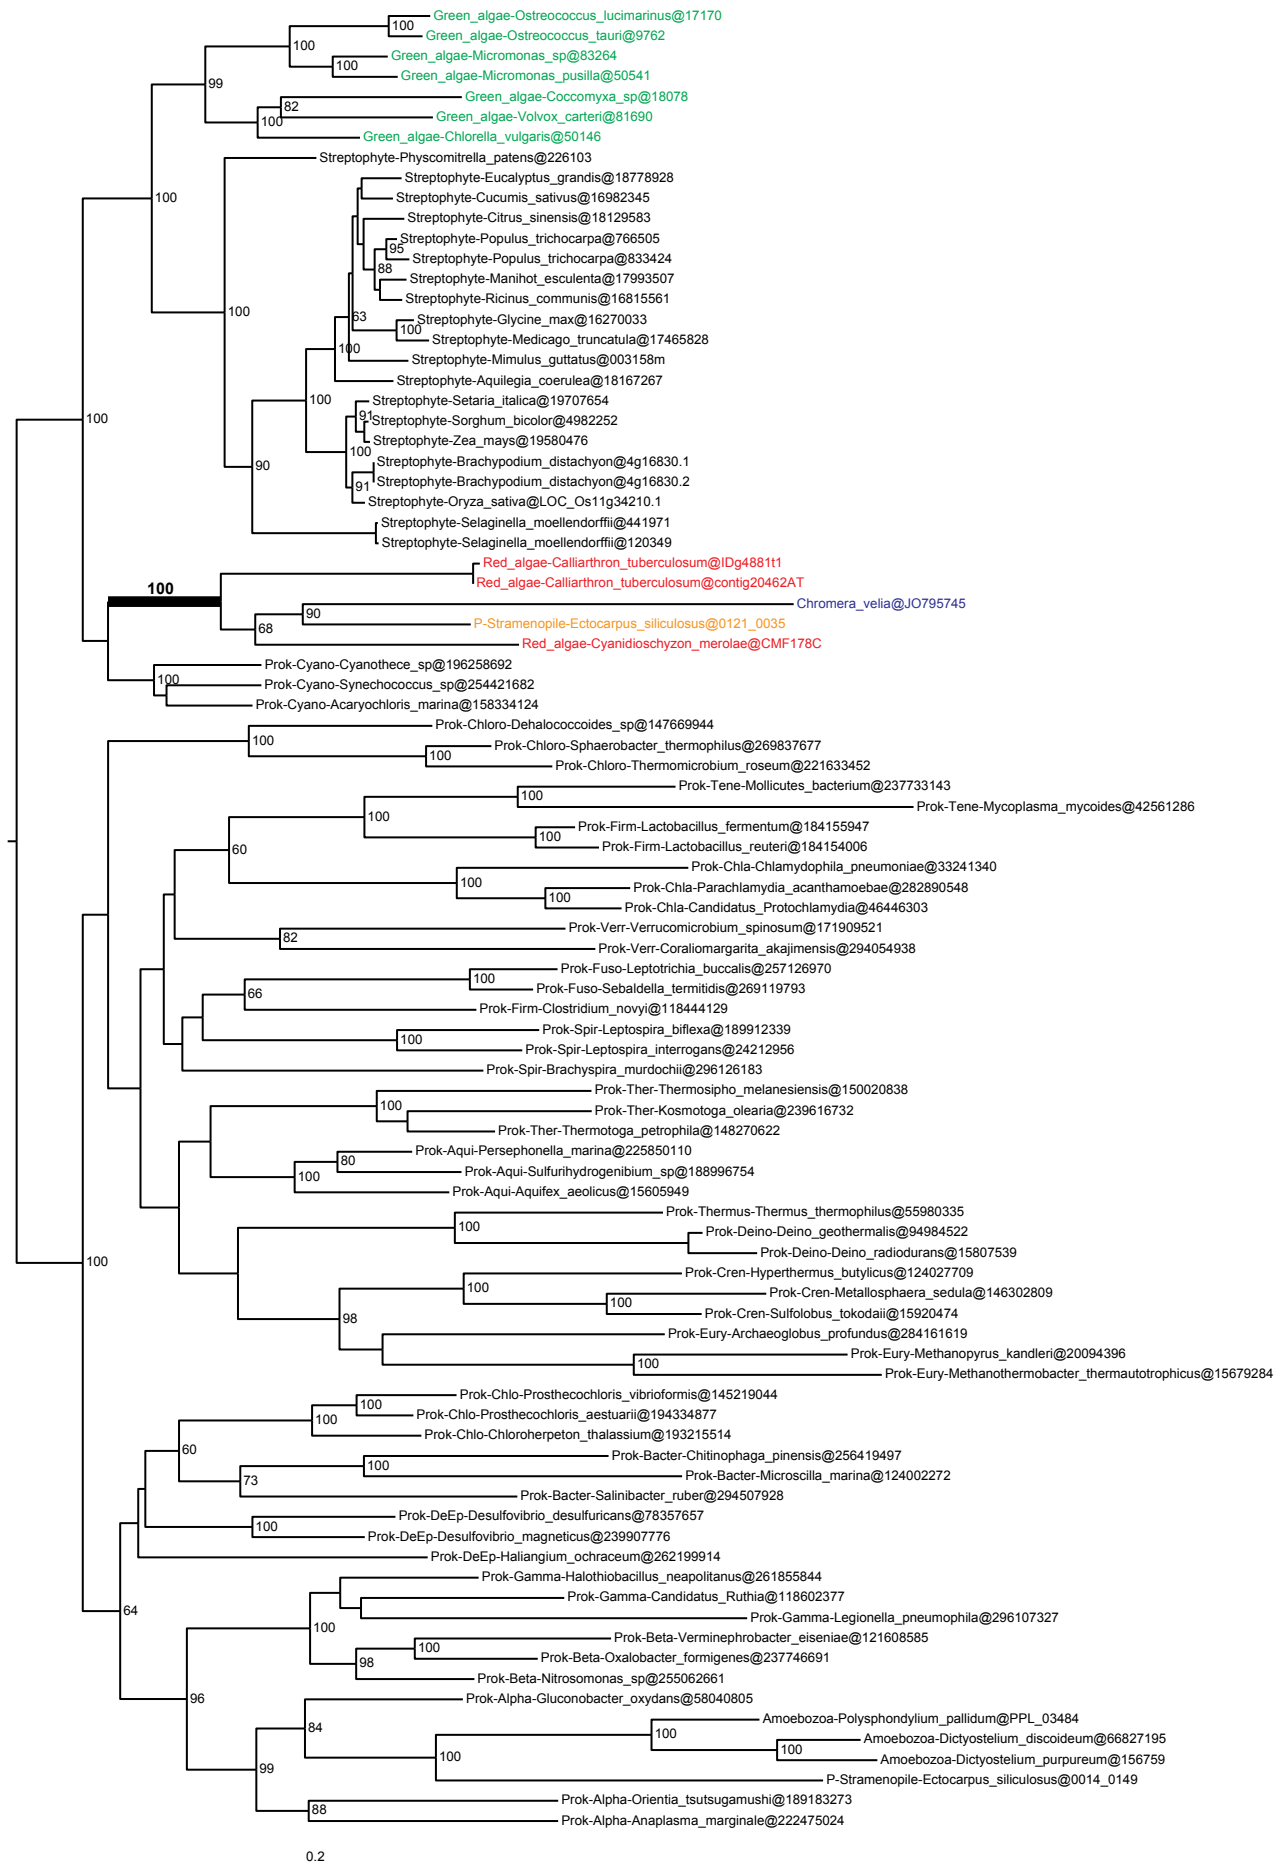

# JO800417: Peptide chain release factor 3

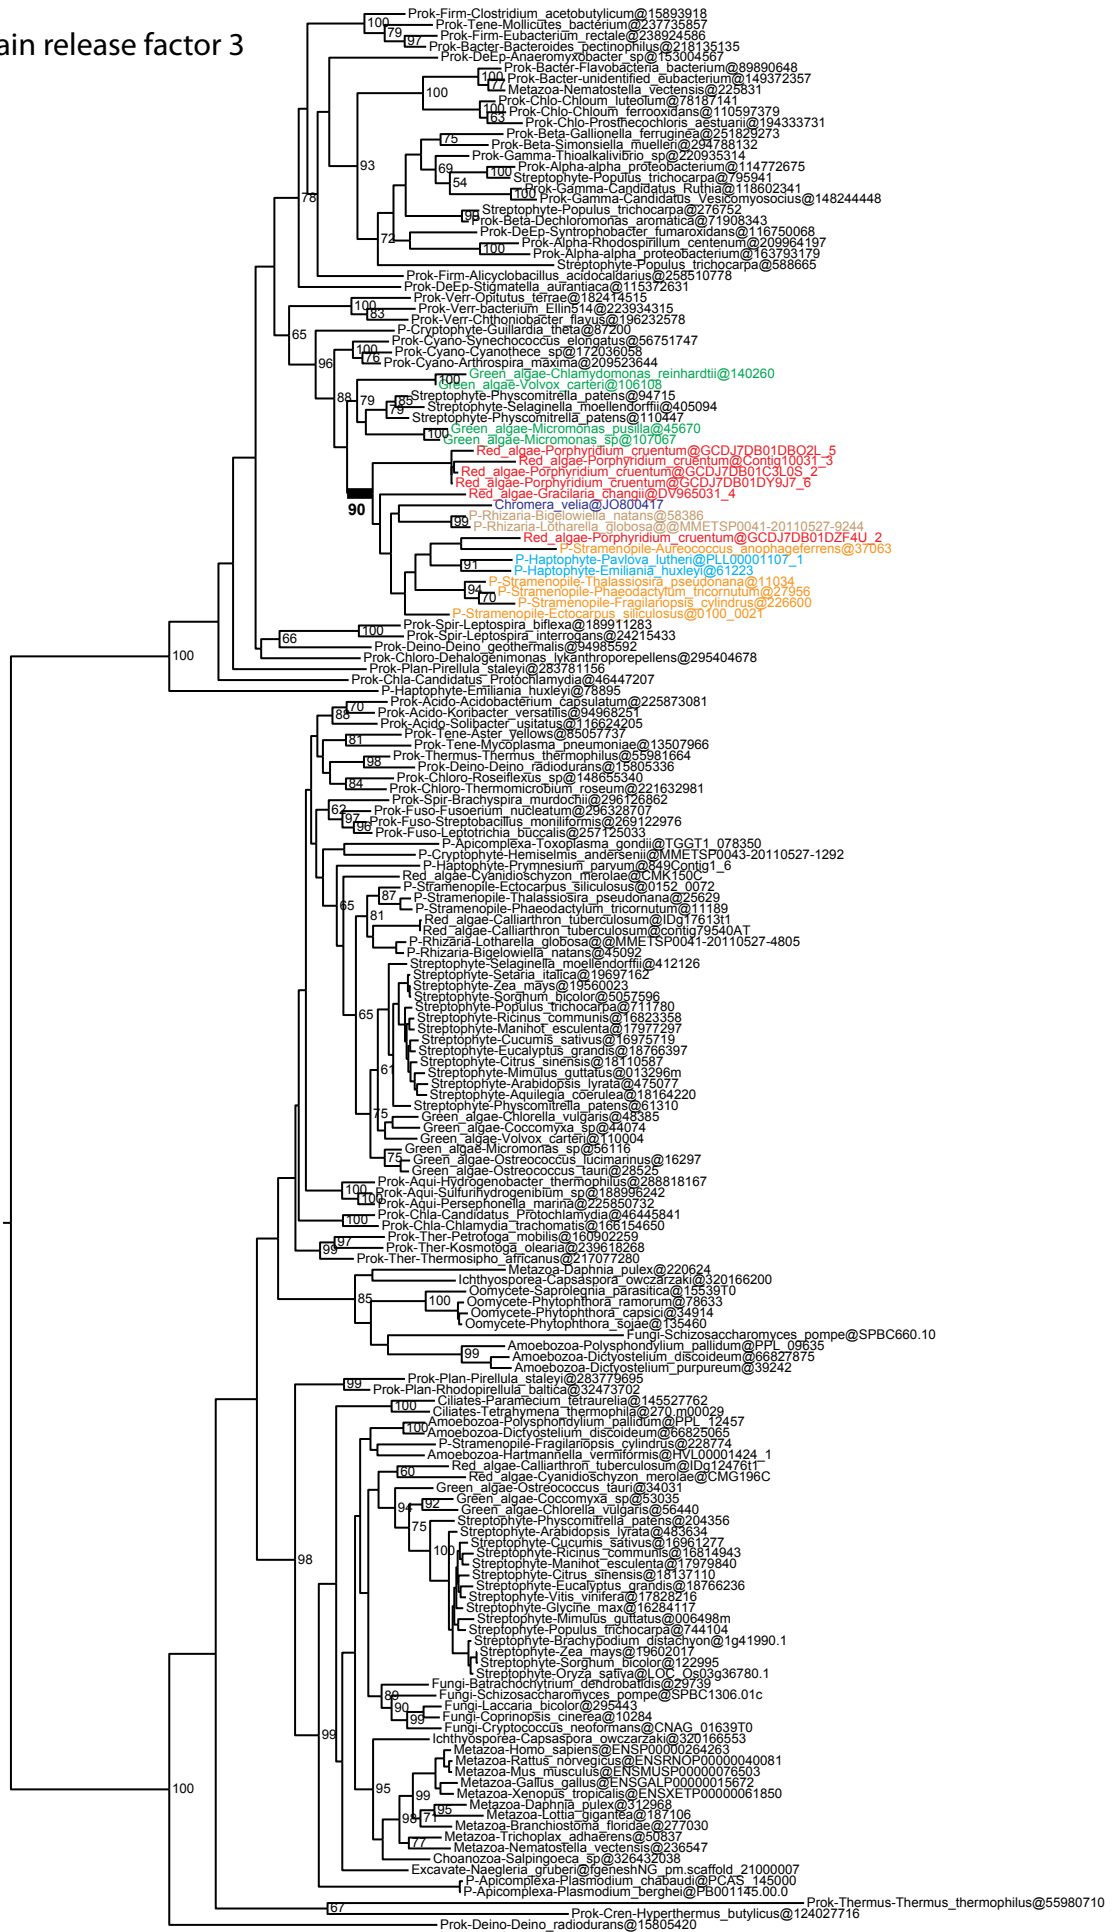

# JO805350: Peptide chain release factor 1

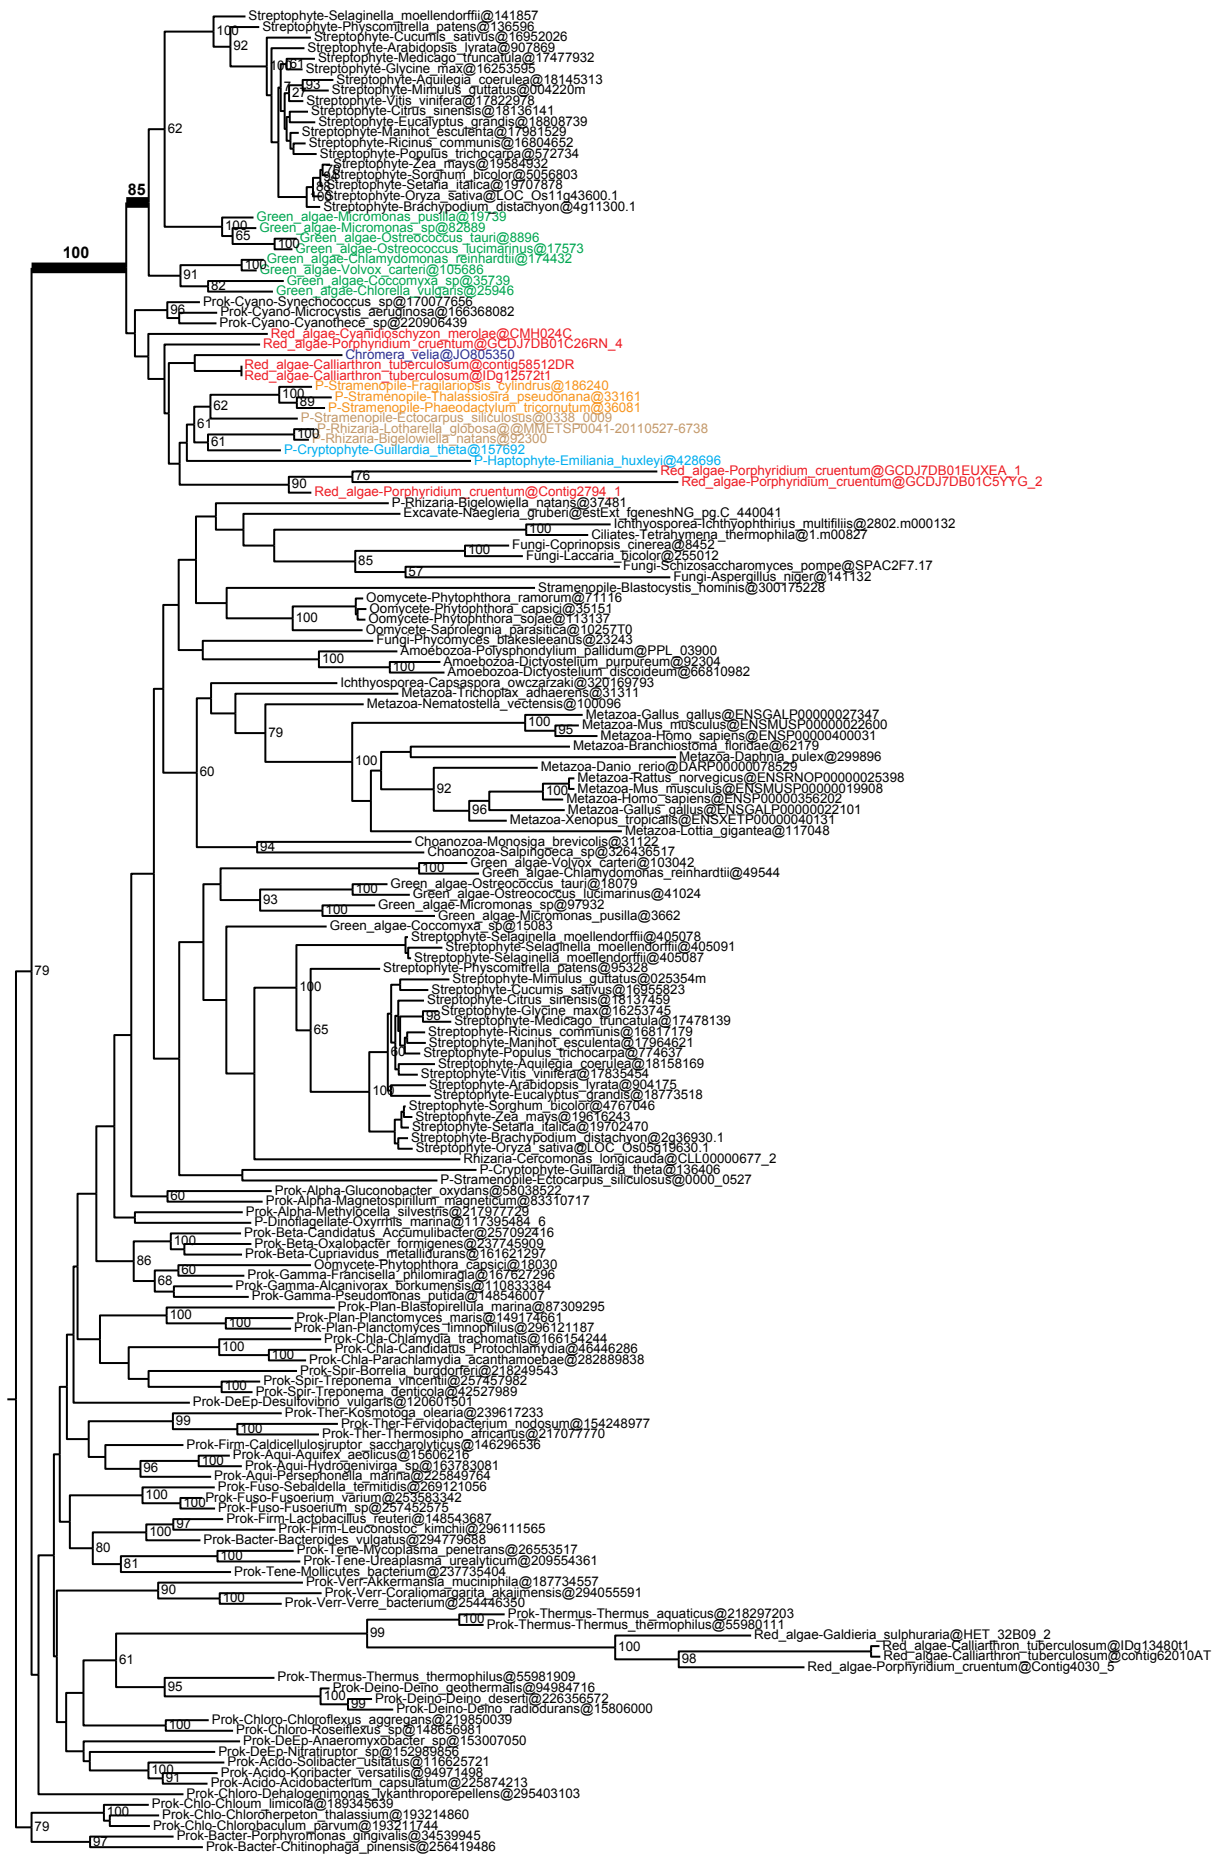

JO807105: Electroneutral sodium bicarbonate exchanger 1

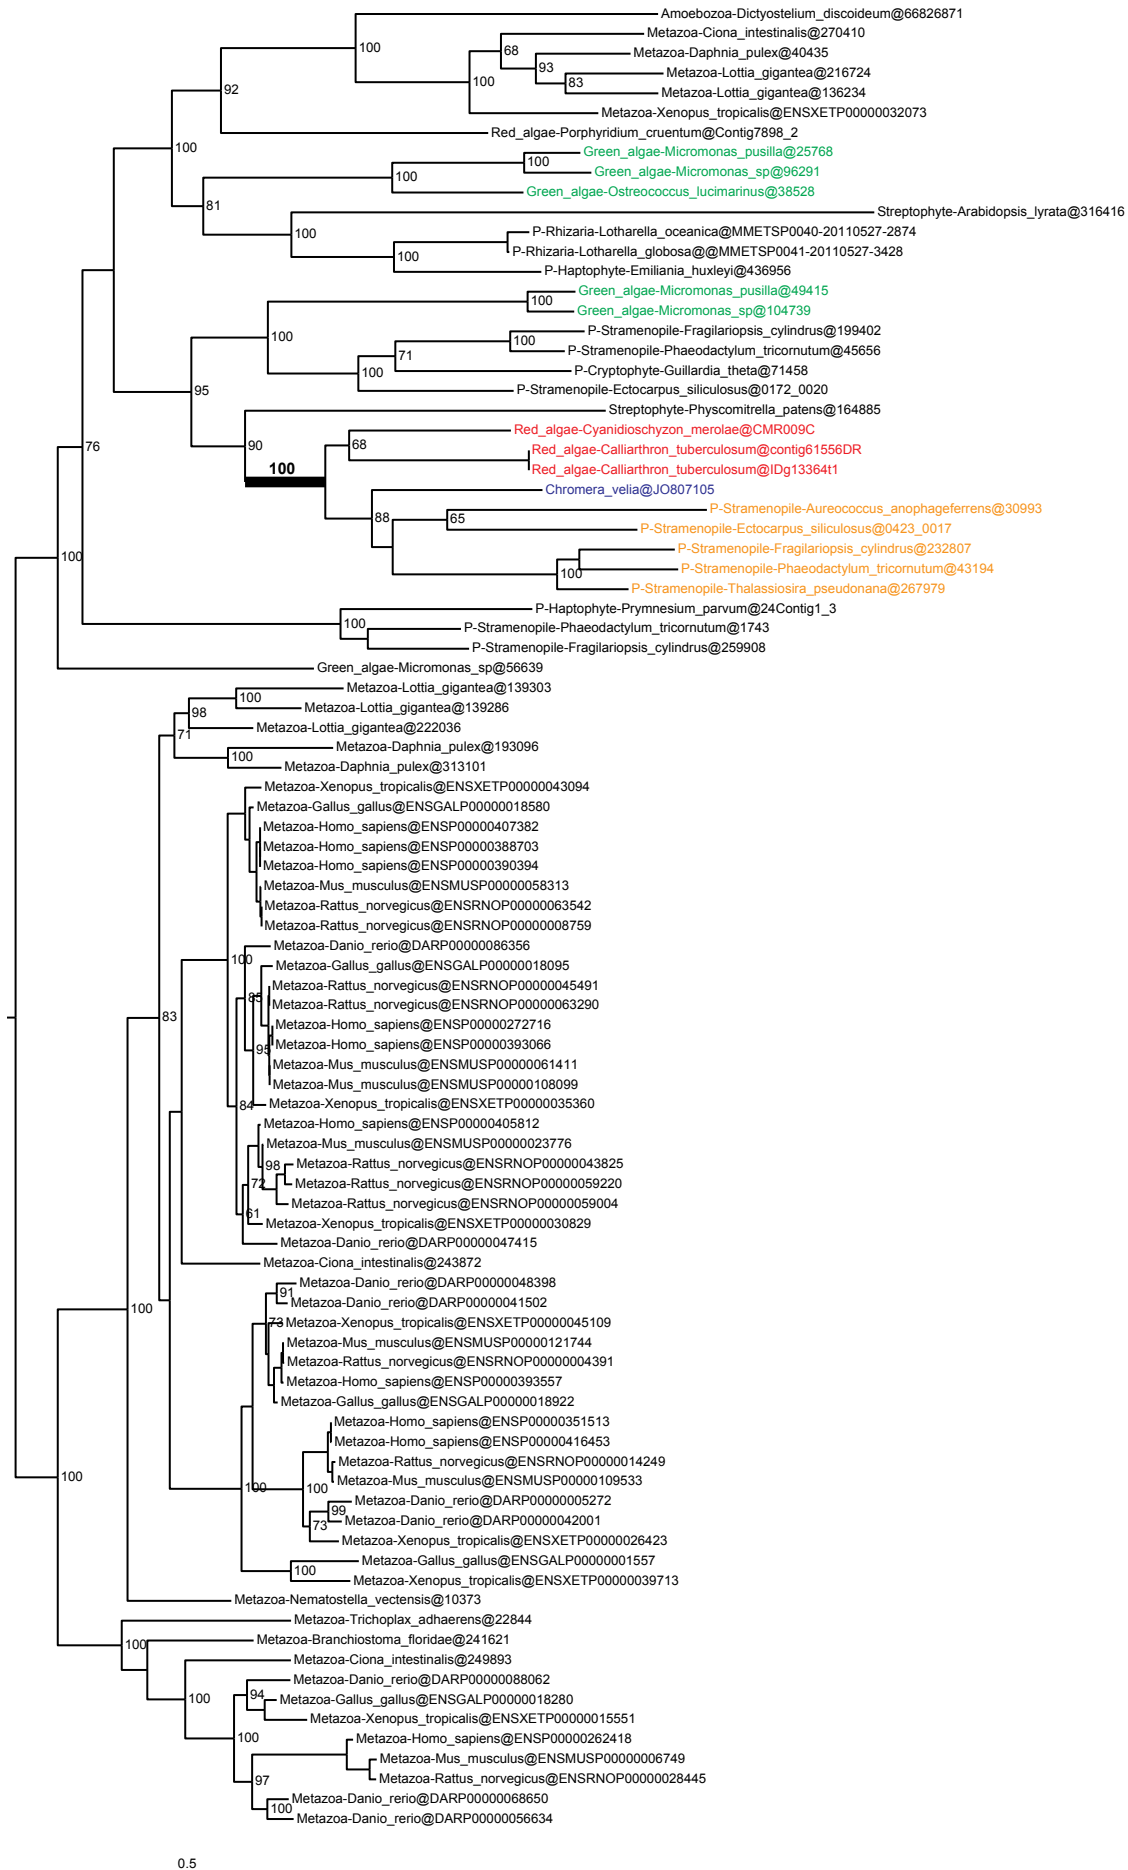

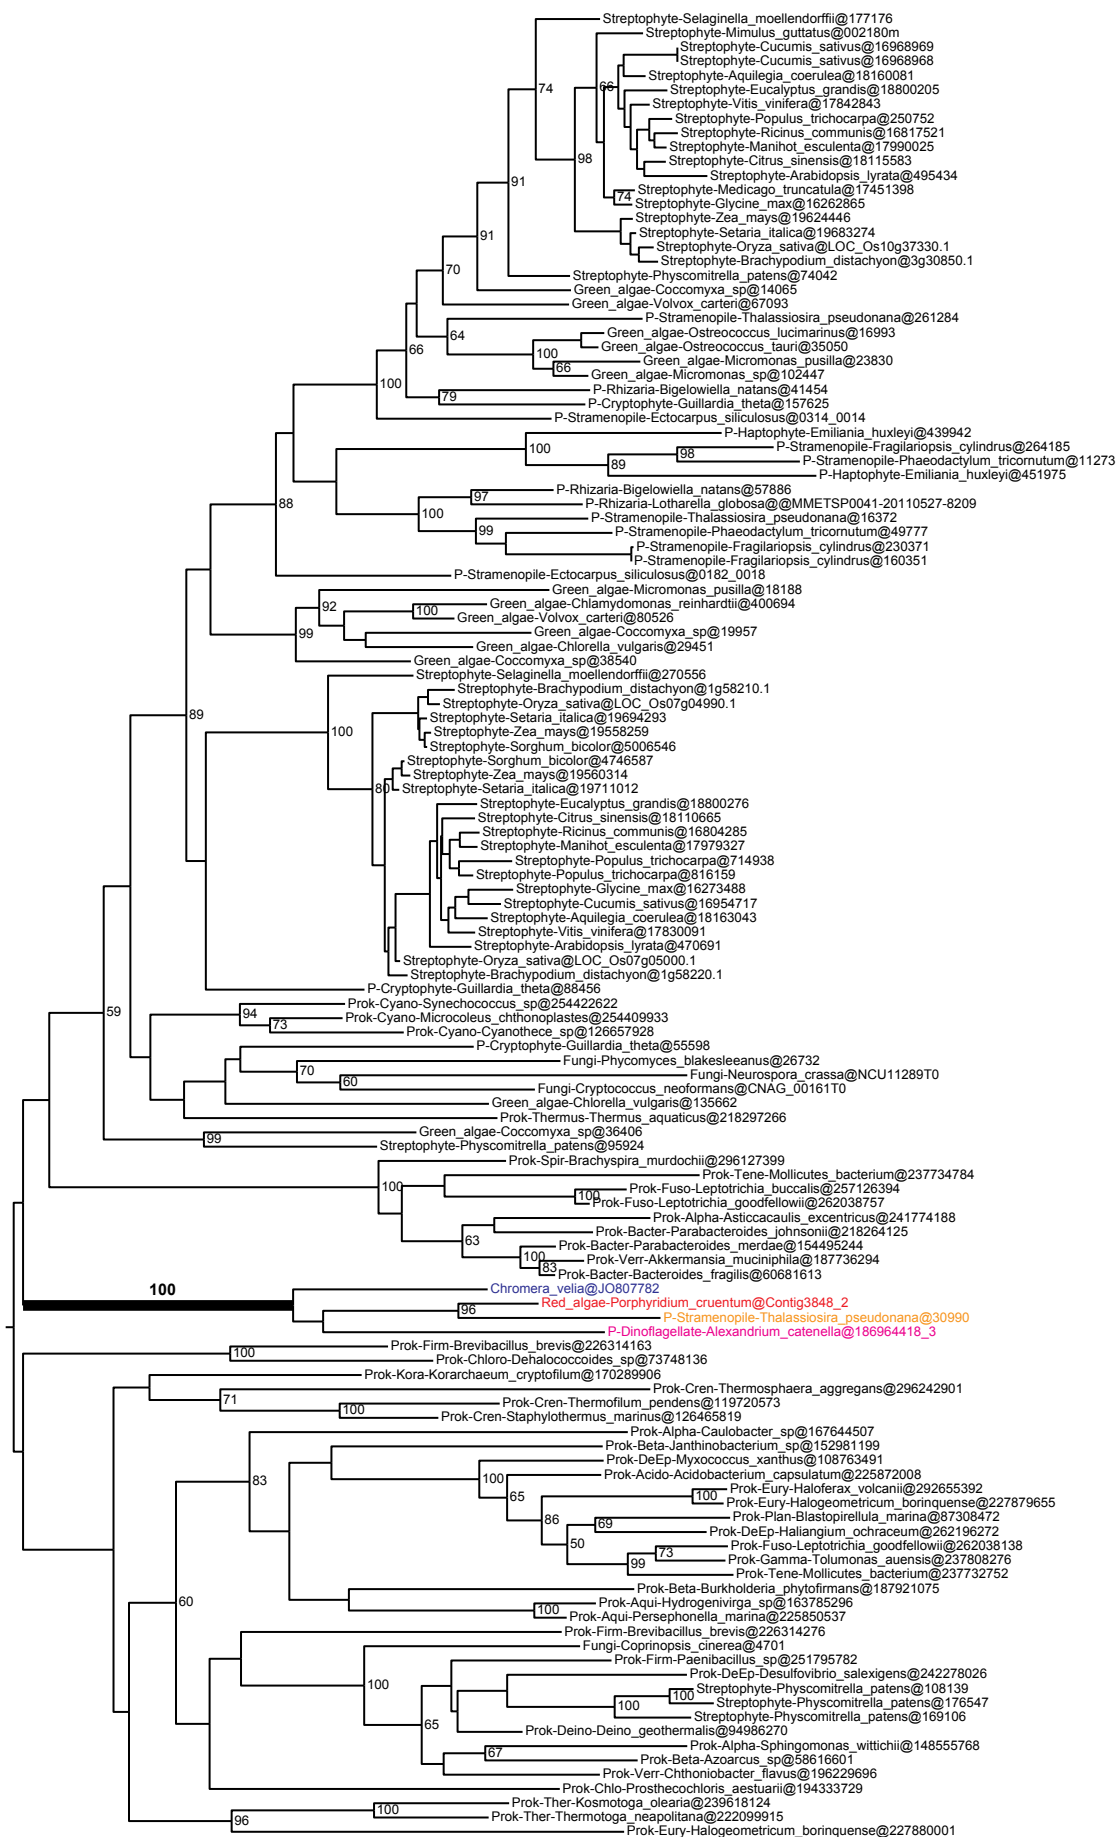

JO812144: Vitamin k epoxide reductase

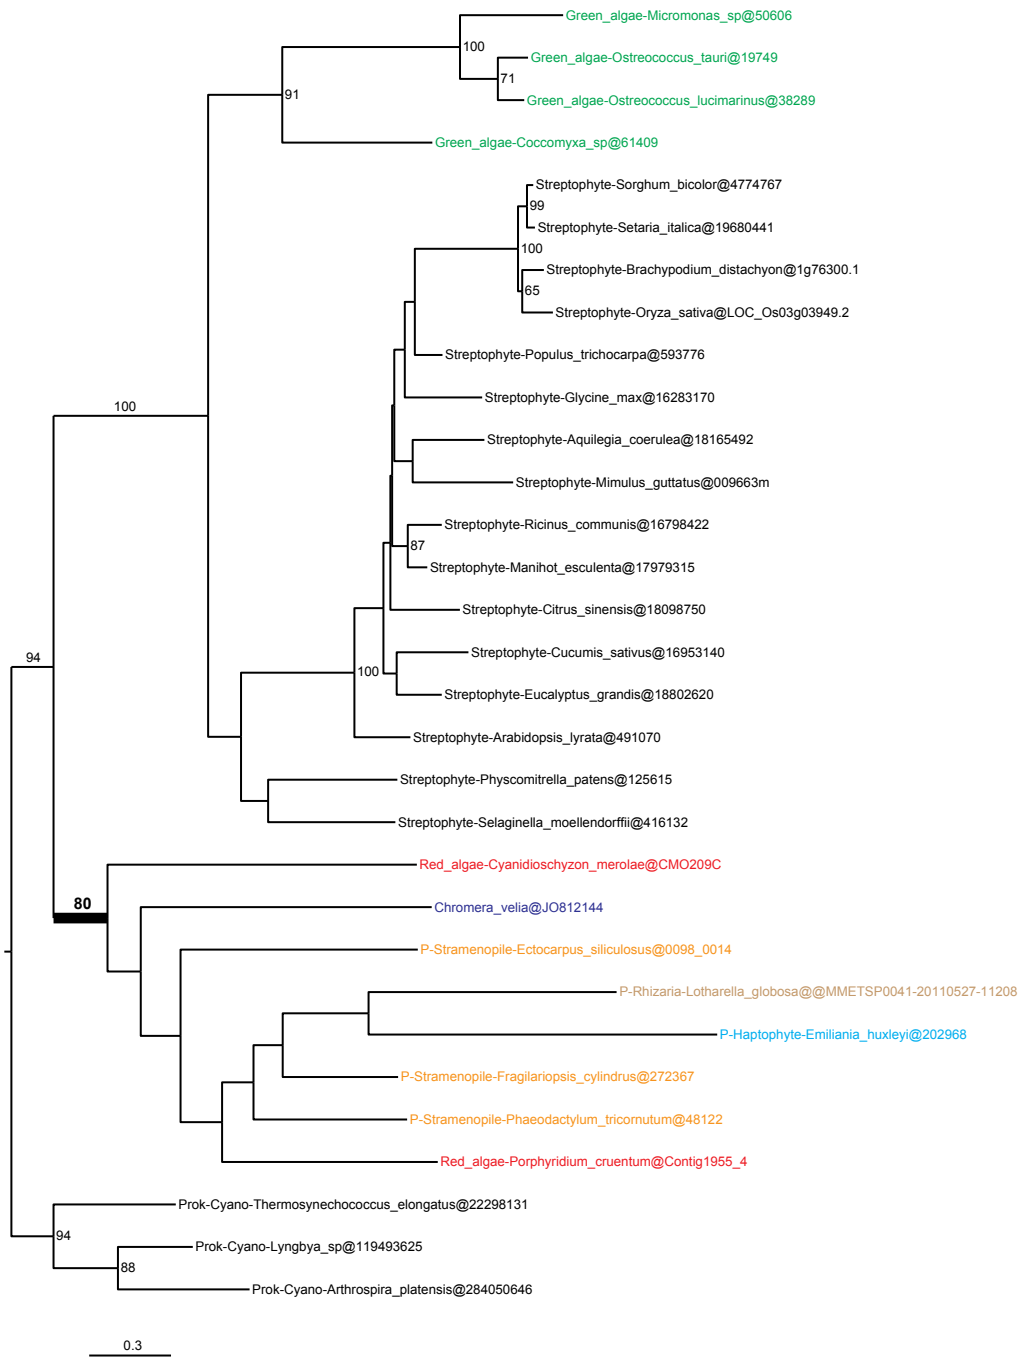

JO813336: Folate biopterin transporter

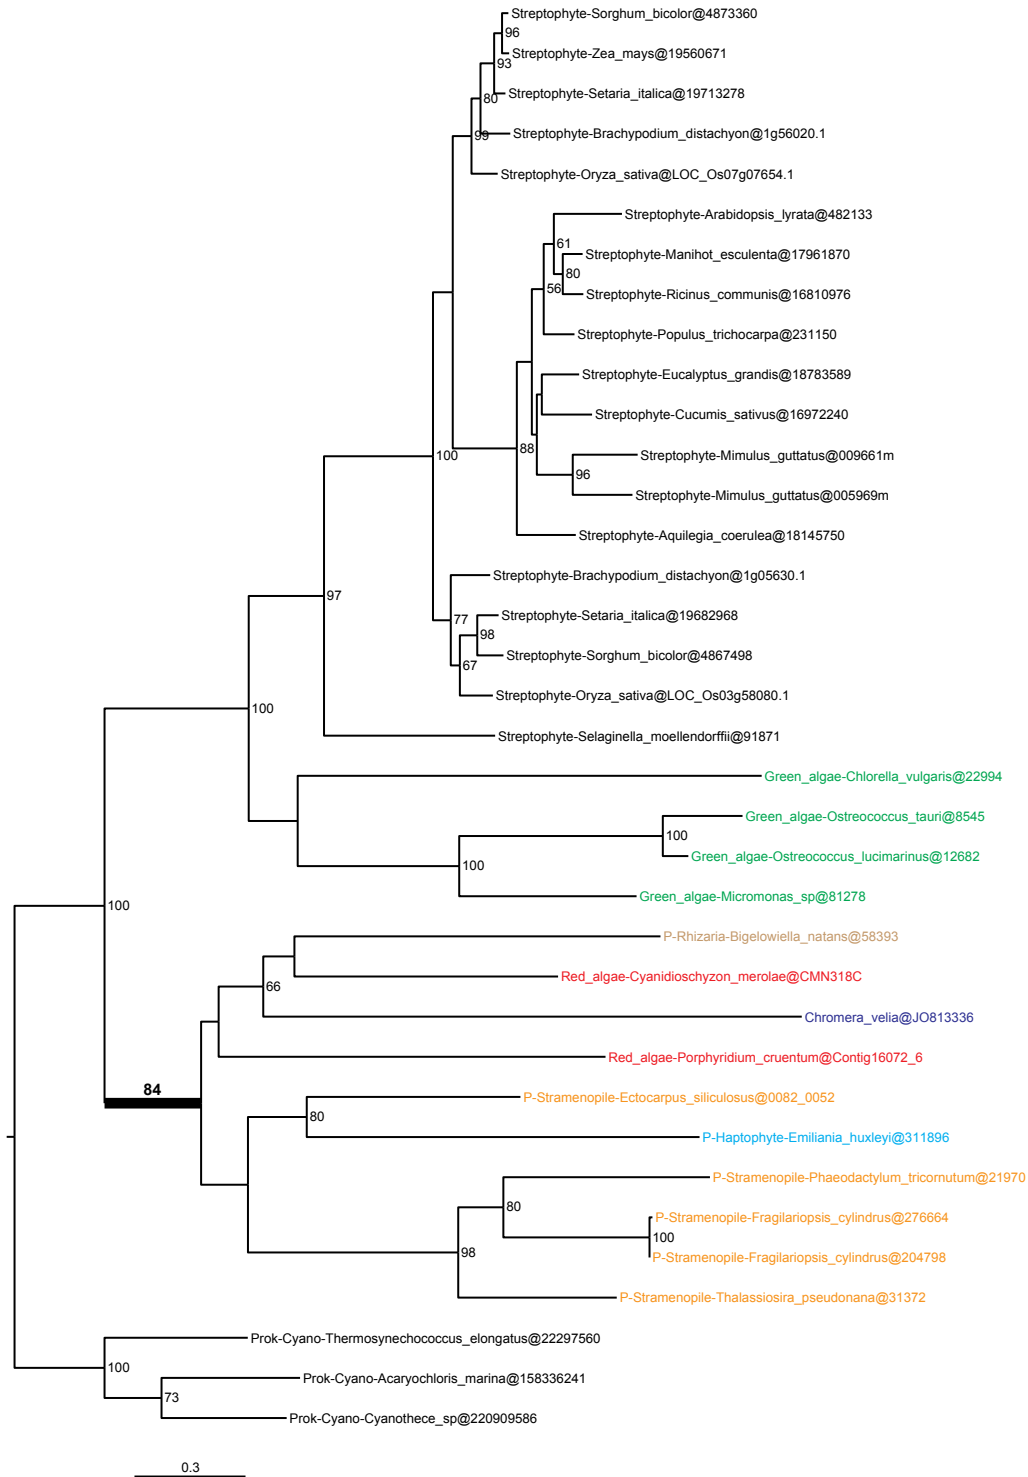

# JO813530: Magnesium chelatase atpase subunit d

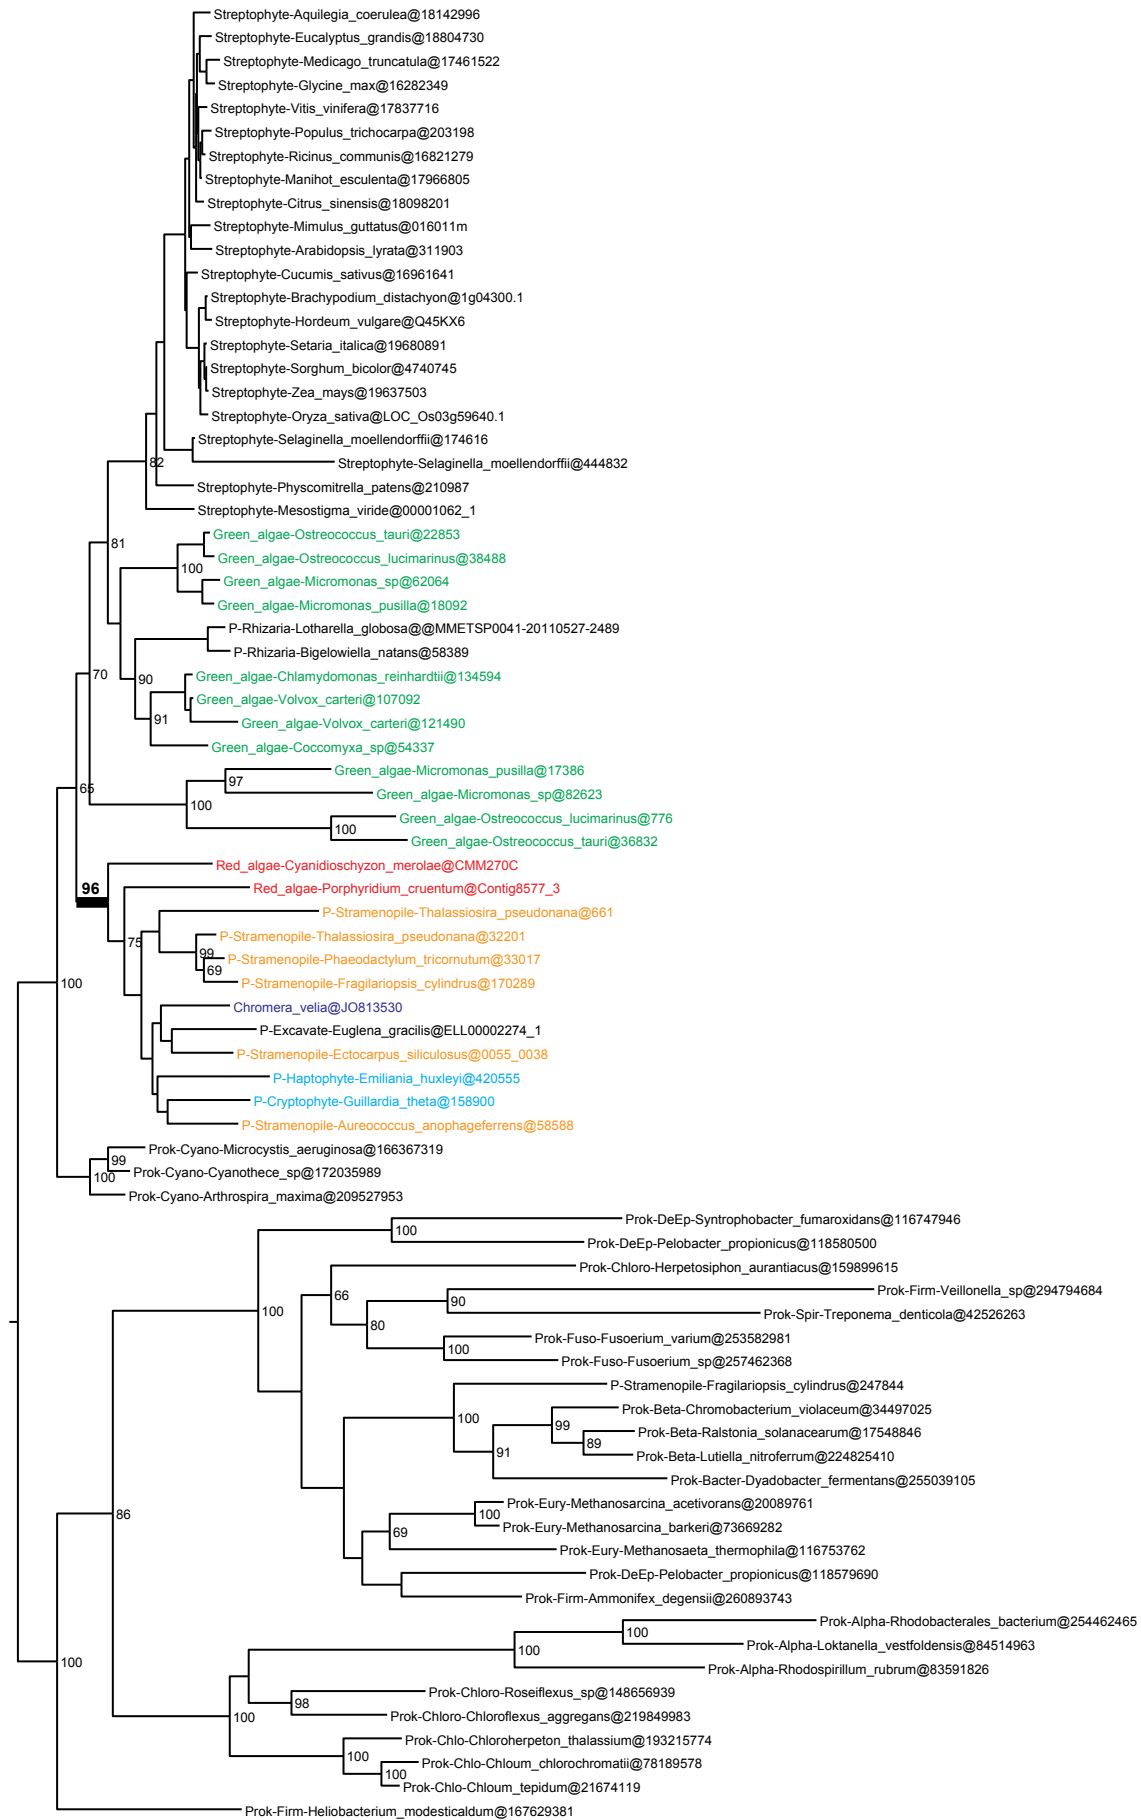

# JO814400: Zinc-binding dehydrogenase

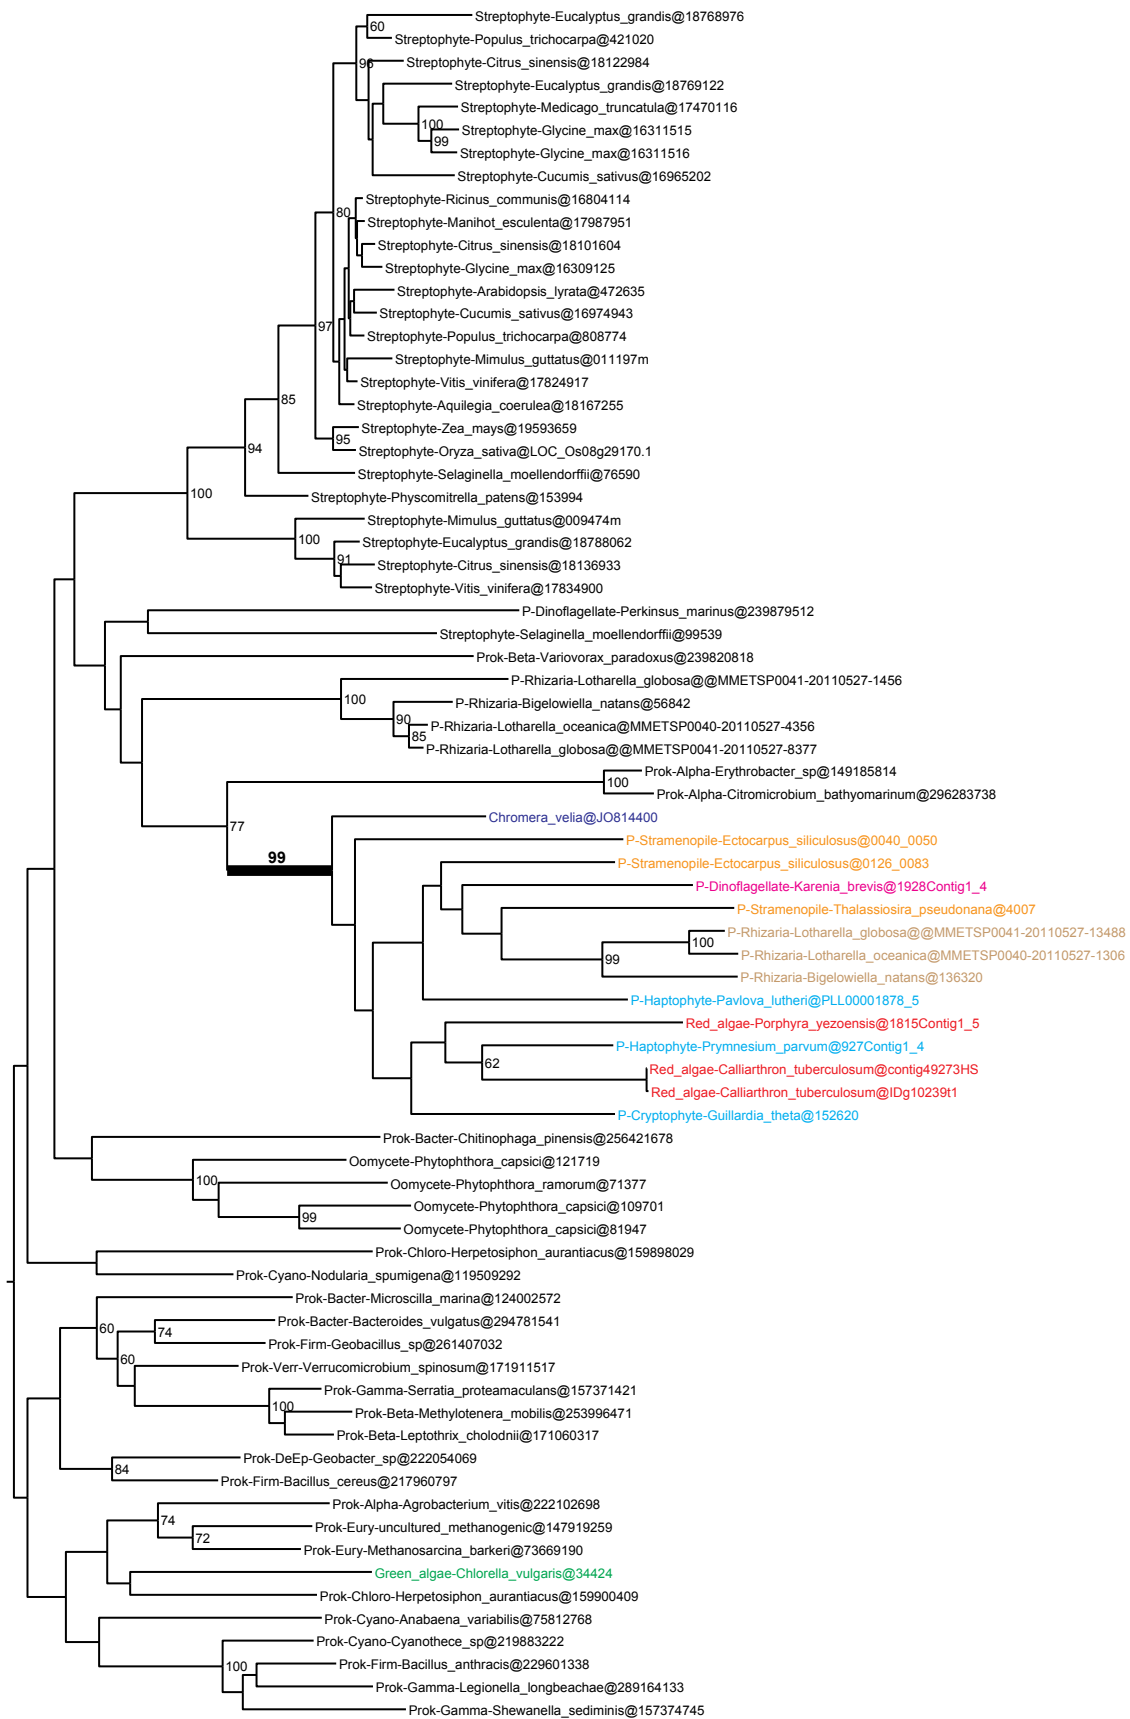

Supplement: evs049_Supplementary_Data.zip [file evs049_Supplementary_Data.zip › FigureS2.pdf]
