# Supplementary material for: Re-evaluating the Green versus Red Signal in Eukaryotes with Secondary Plastid of Red Algal Origin
Source: Oxford University Press journal article supplement (doi:10.1093/gbe/evs049), 2012-01-01

JO786729: No function prediction

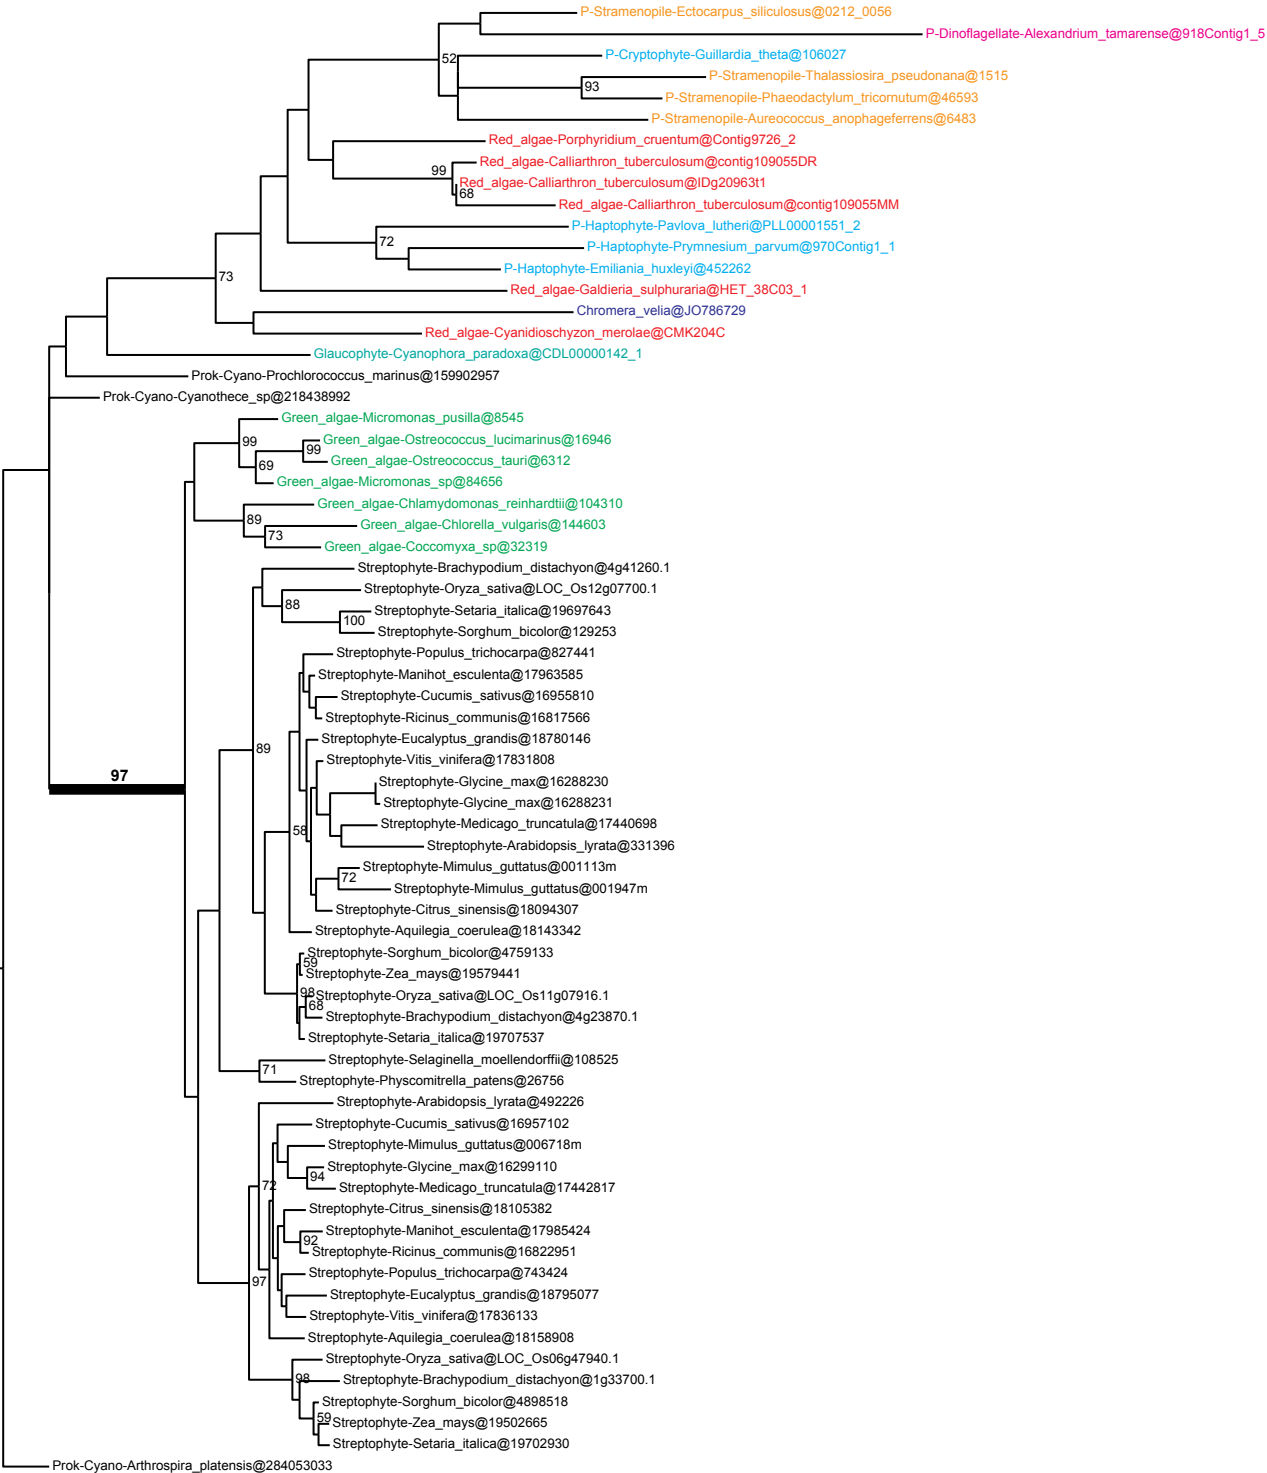

JO786748: ATP-dependent clp protease proteolytic subunit

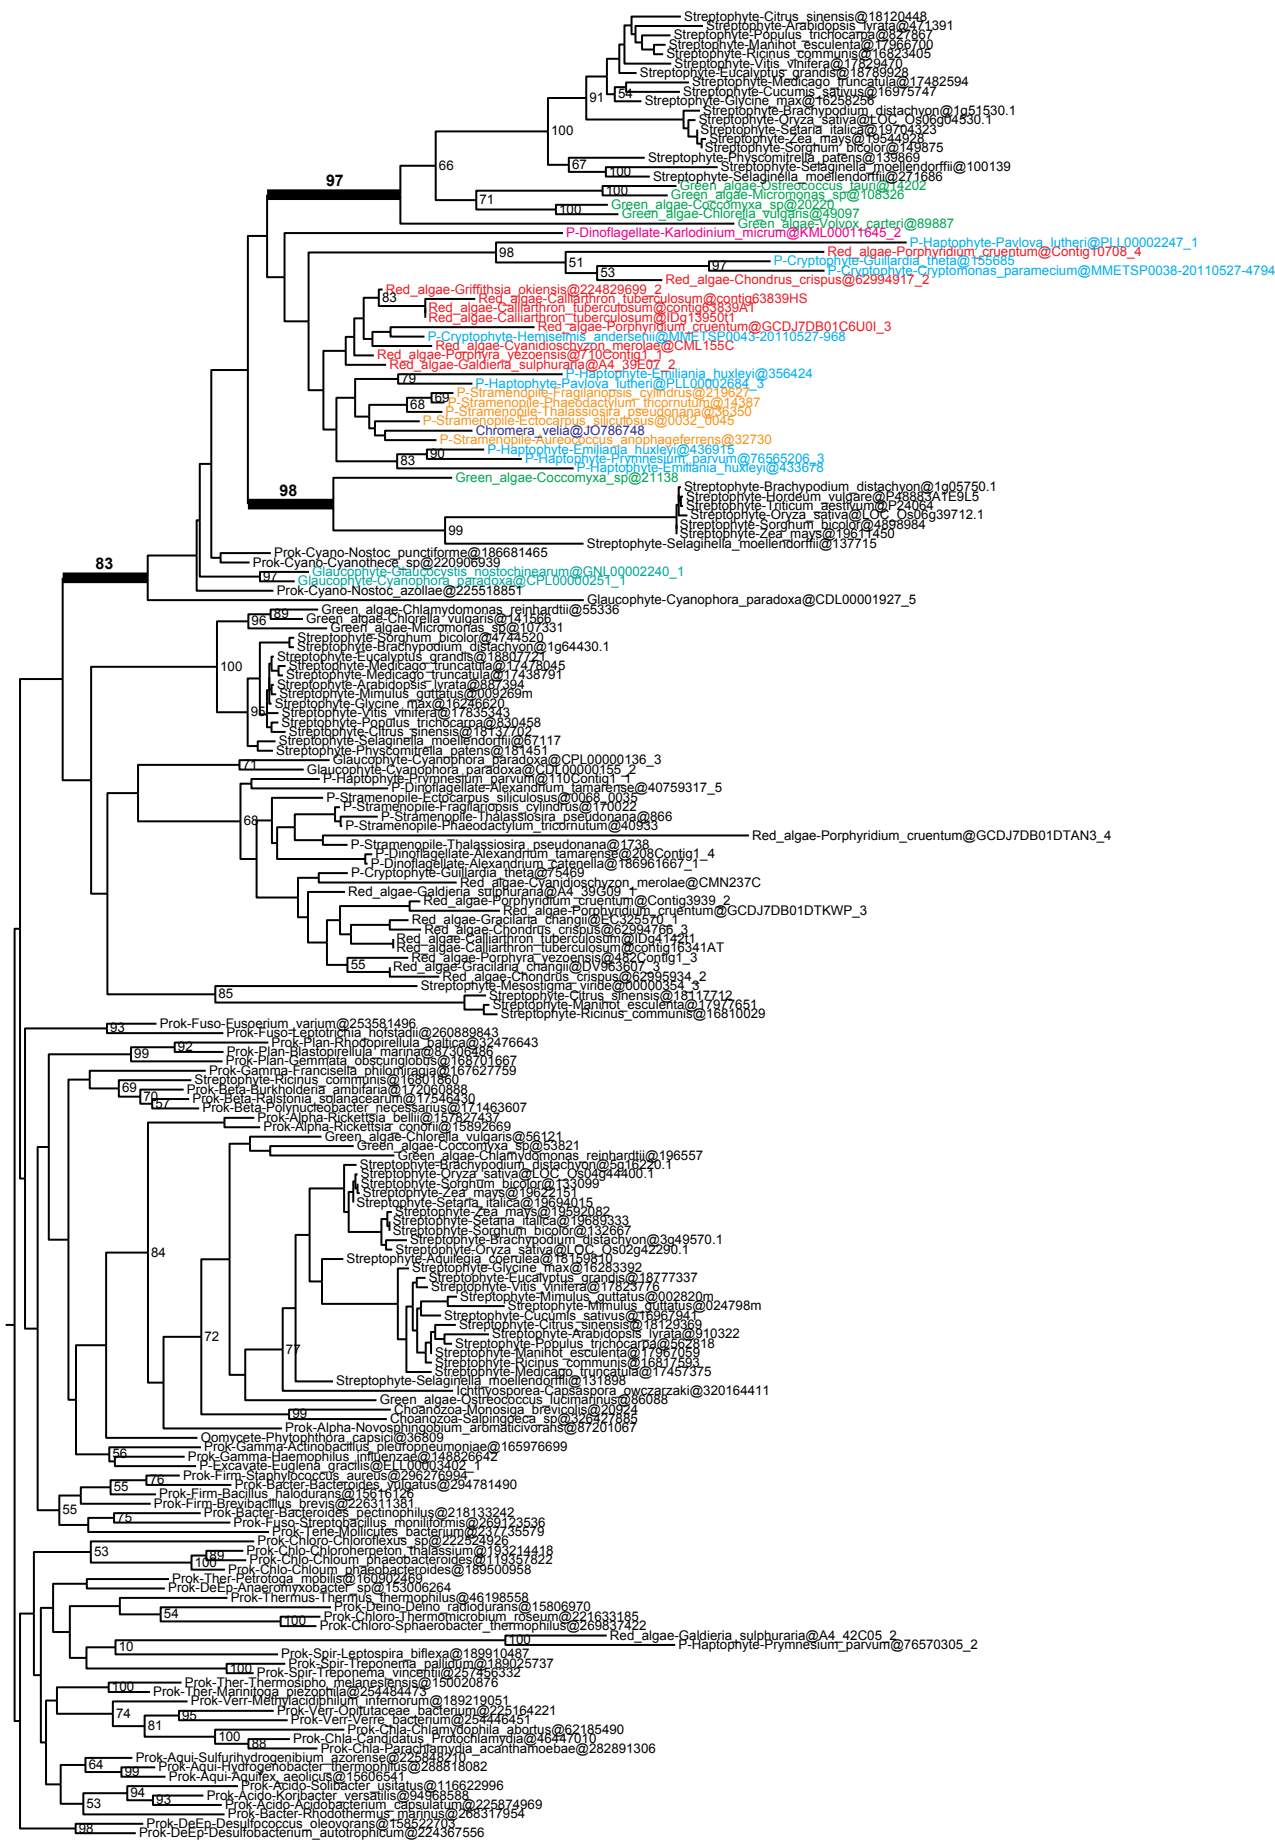

# JO803234: Nad-dependent epimerase dehydratase

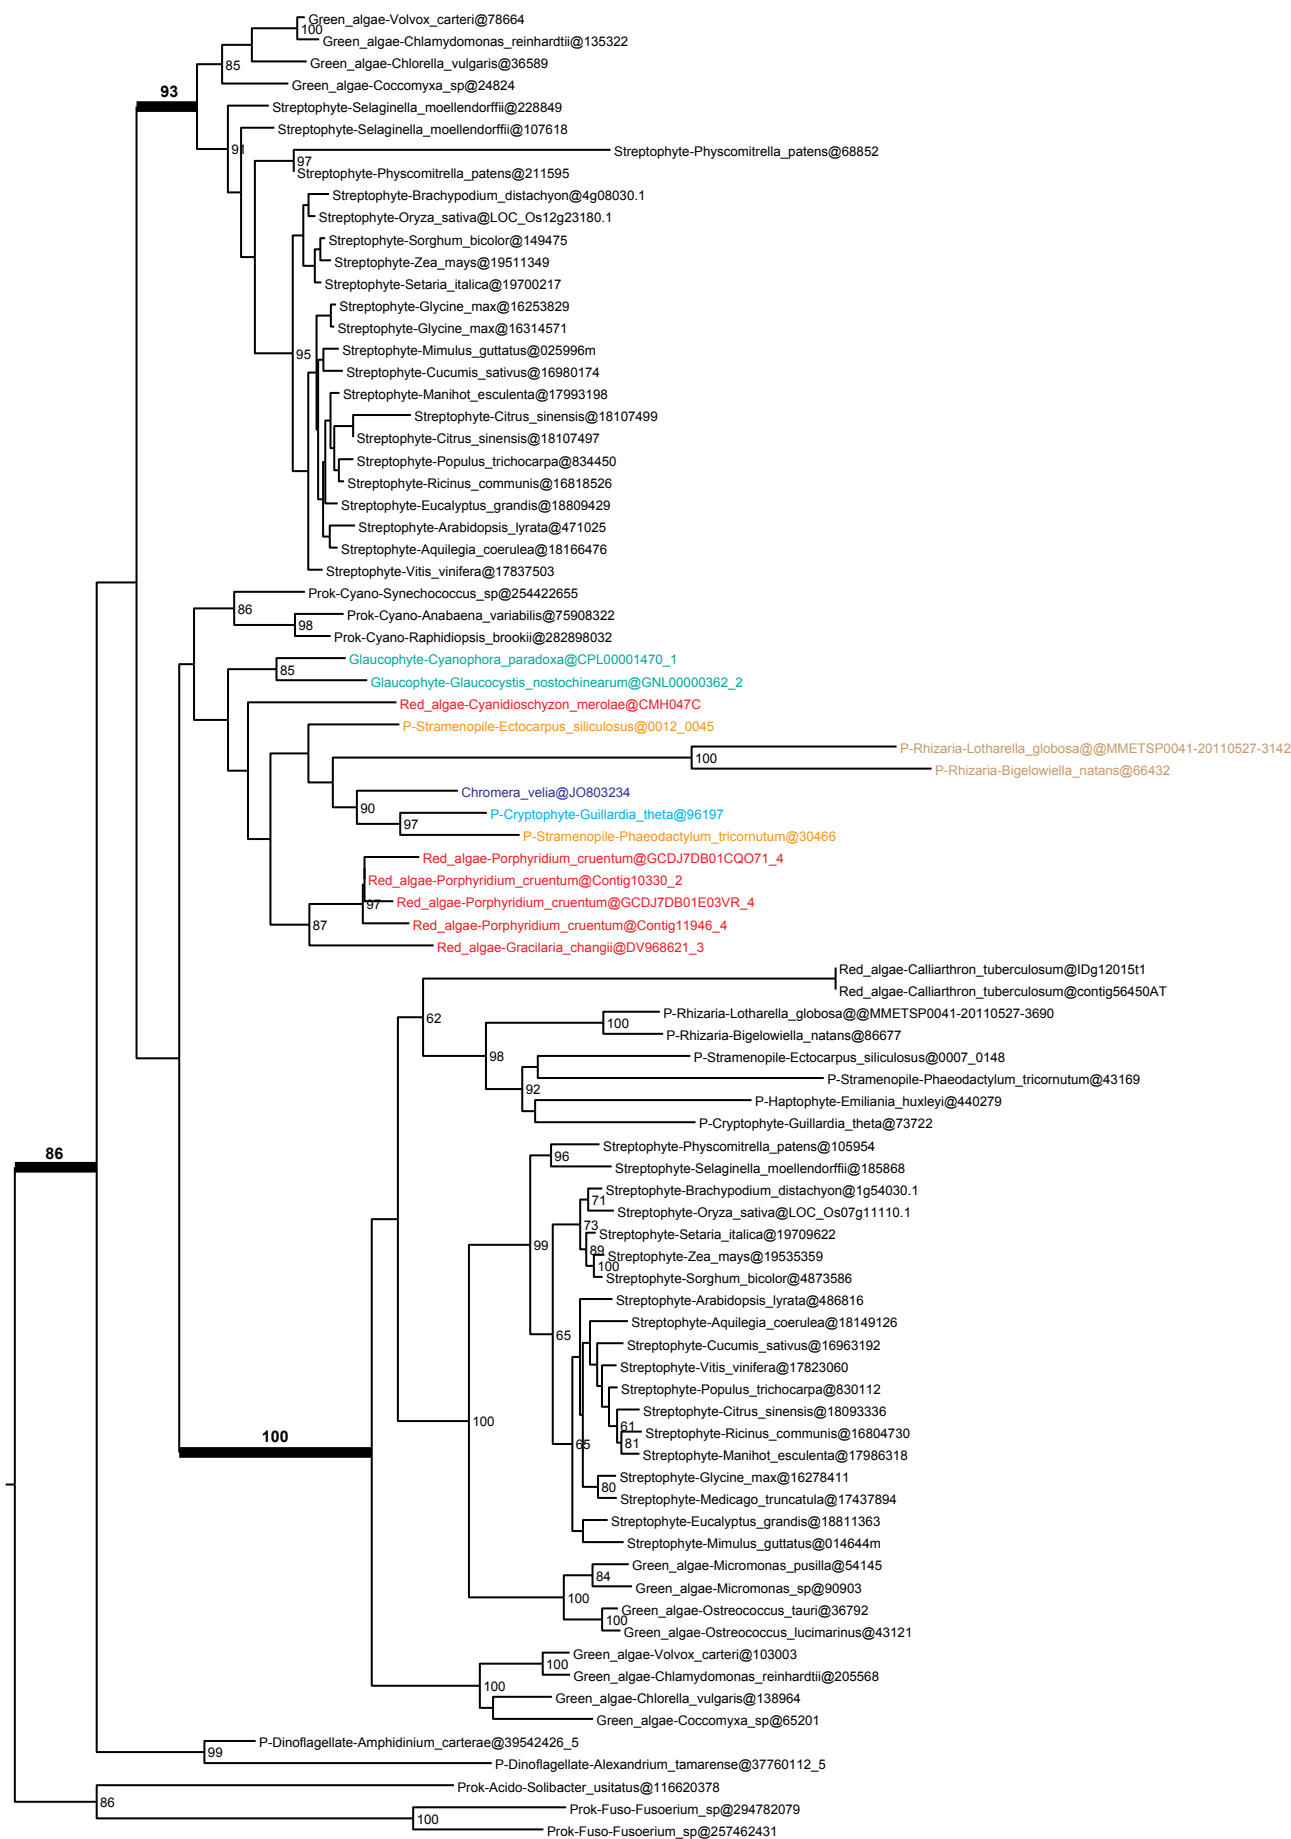

HO865098: Flavodoxin

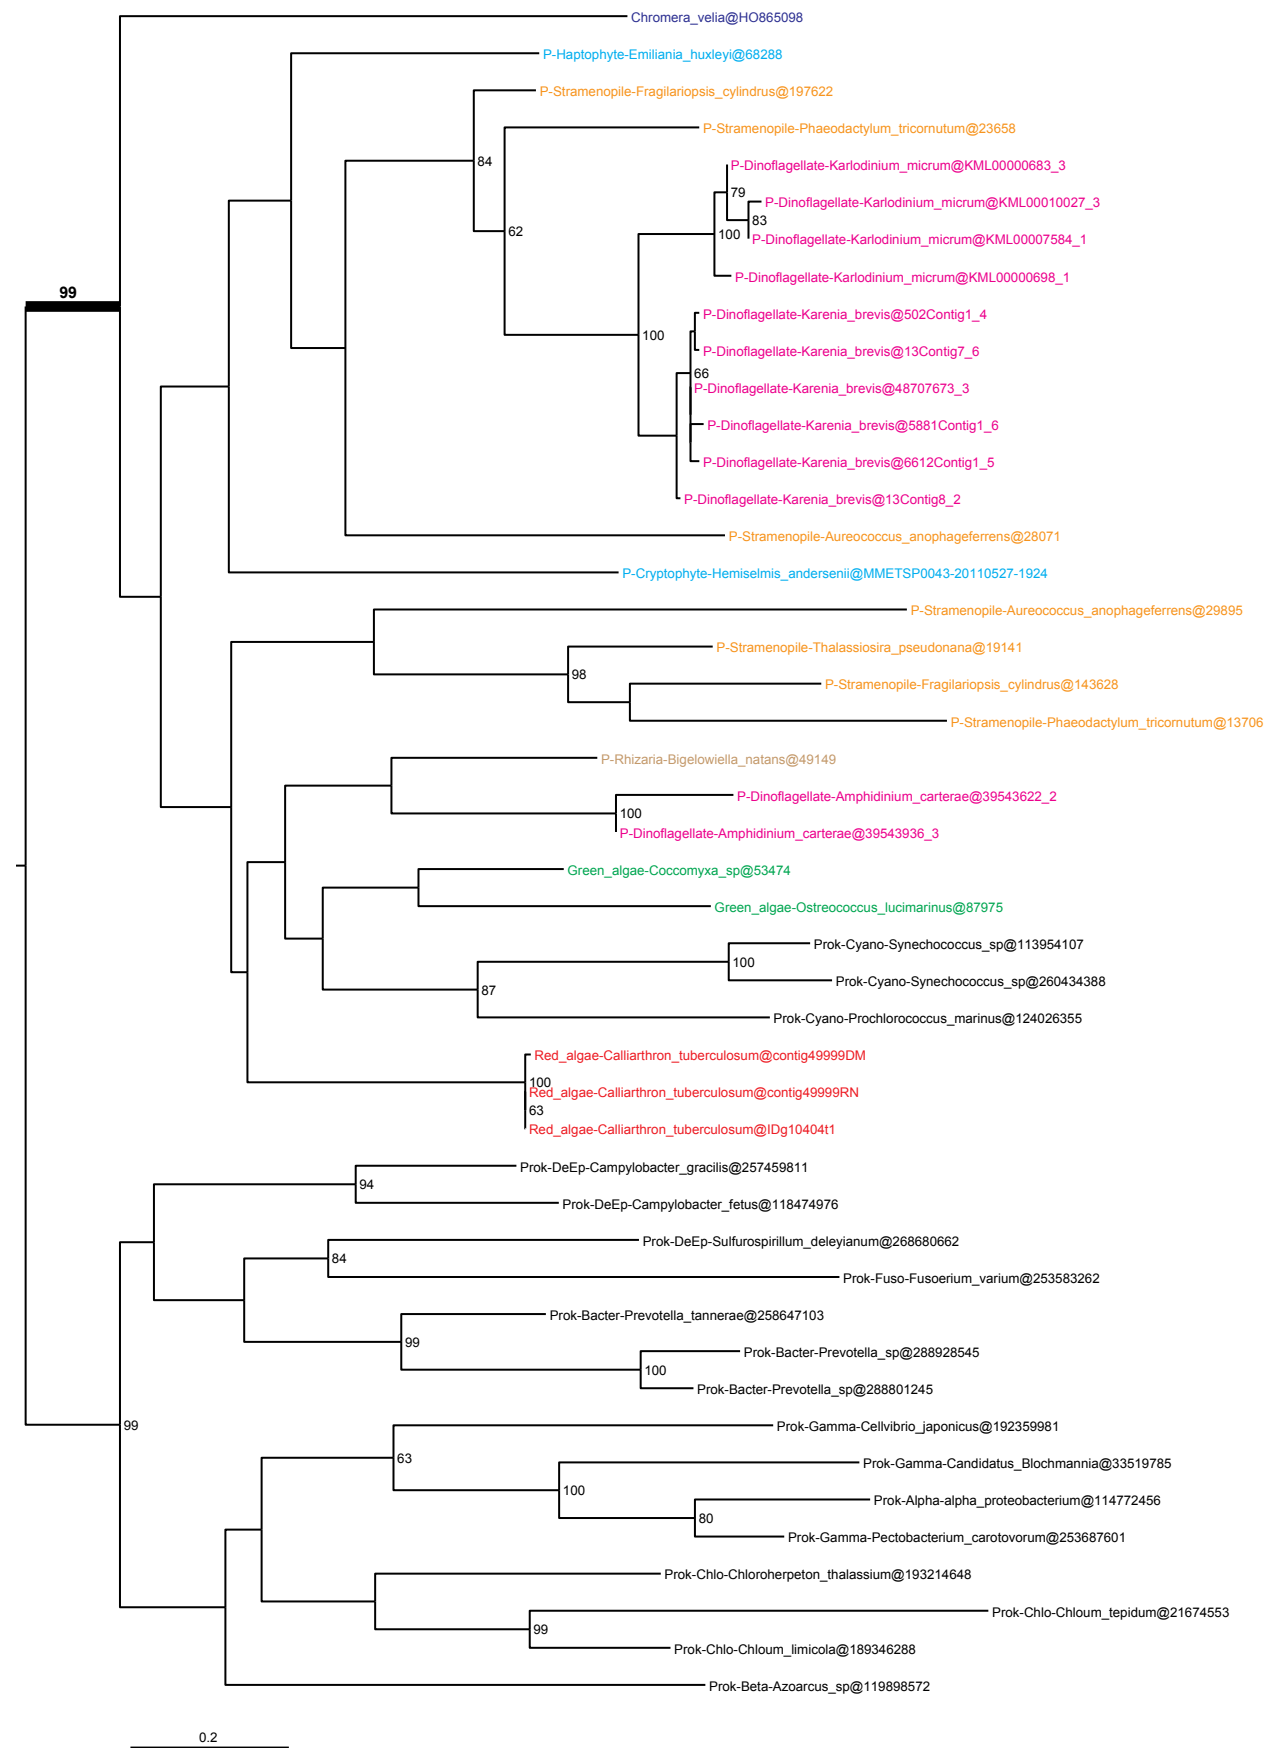

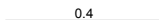

## 0.4

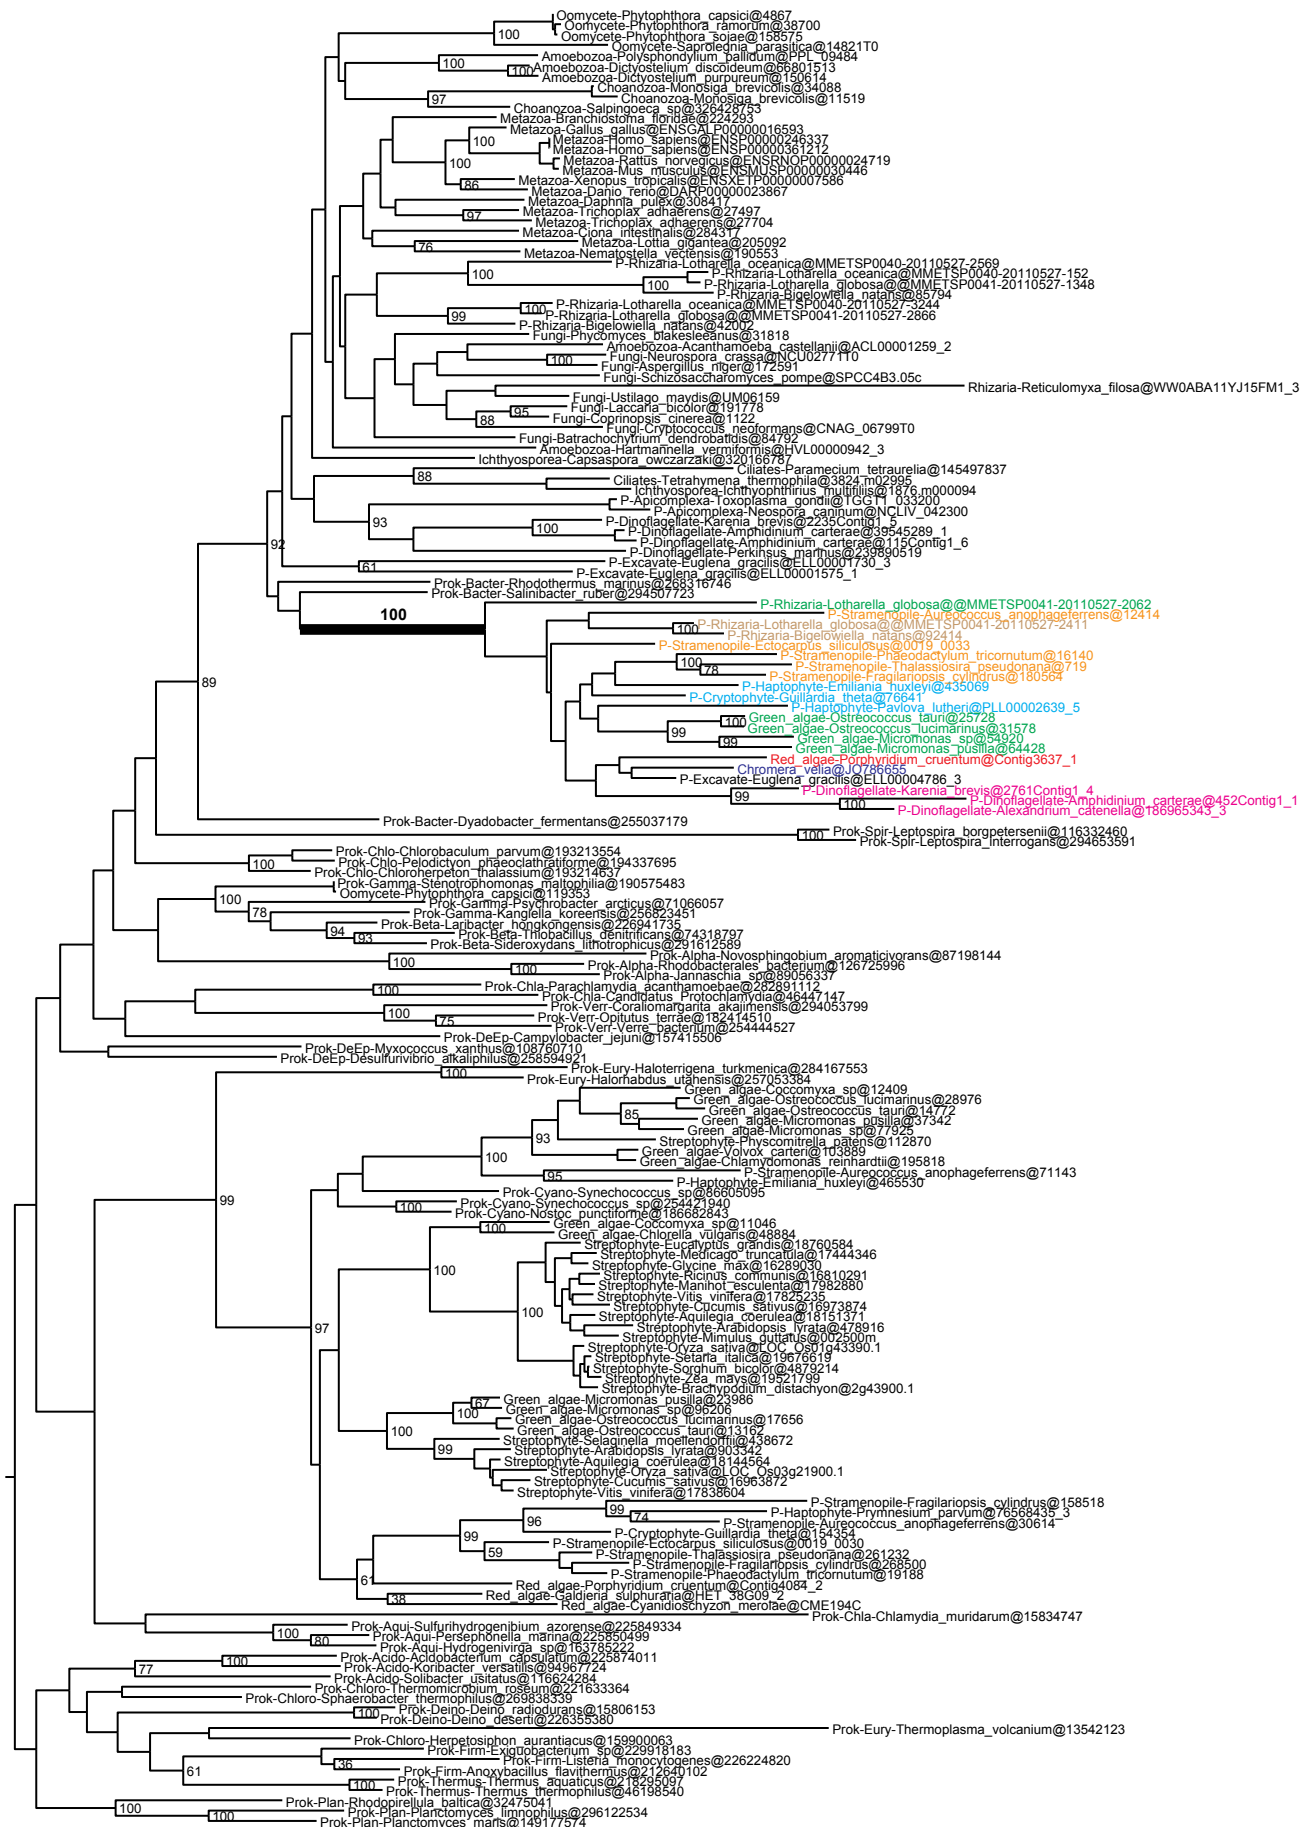

JO786778: Zeta-carotene desaturase

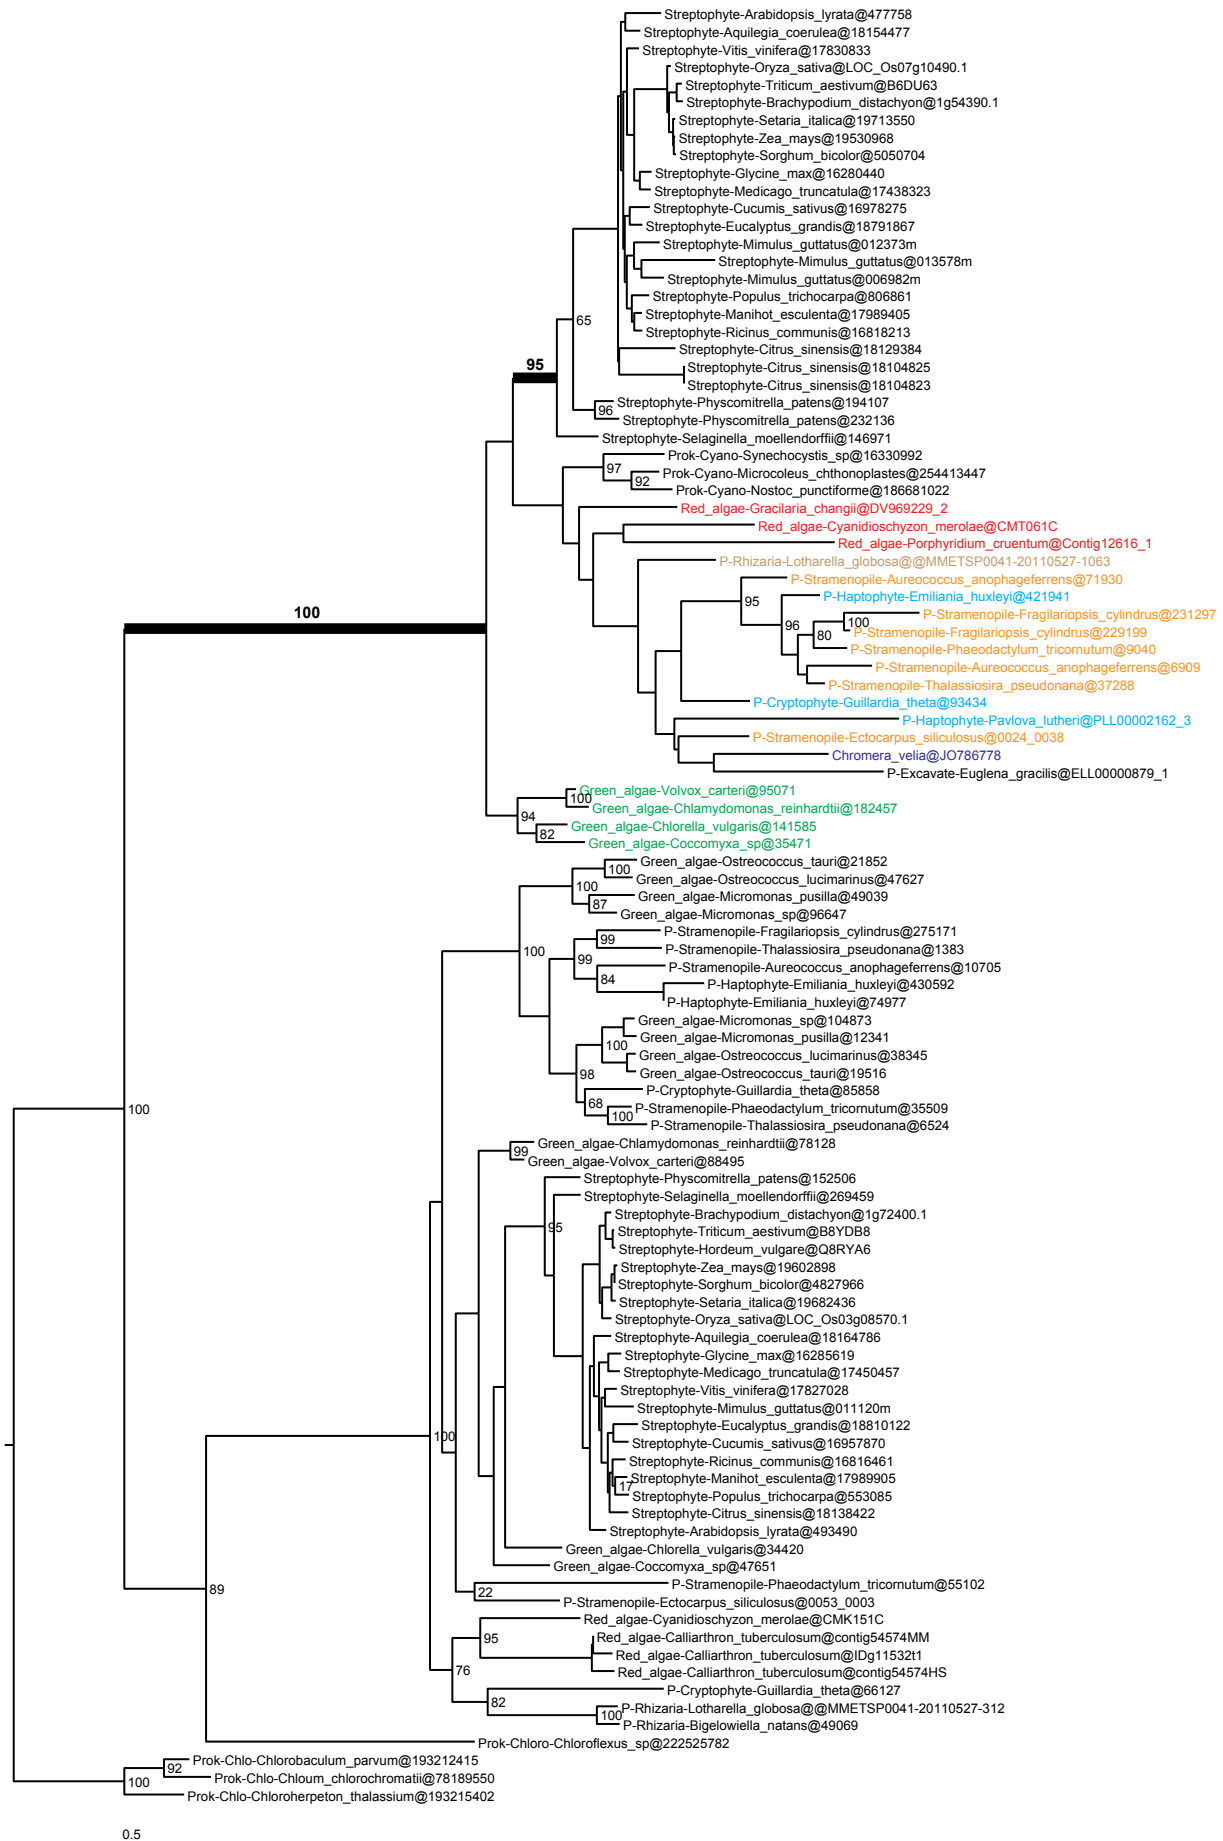

# JO799950: Aldo keto reductase

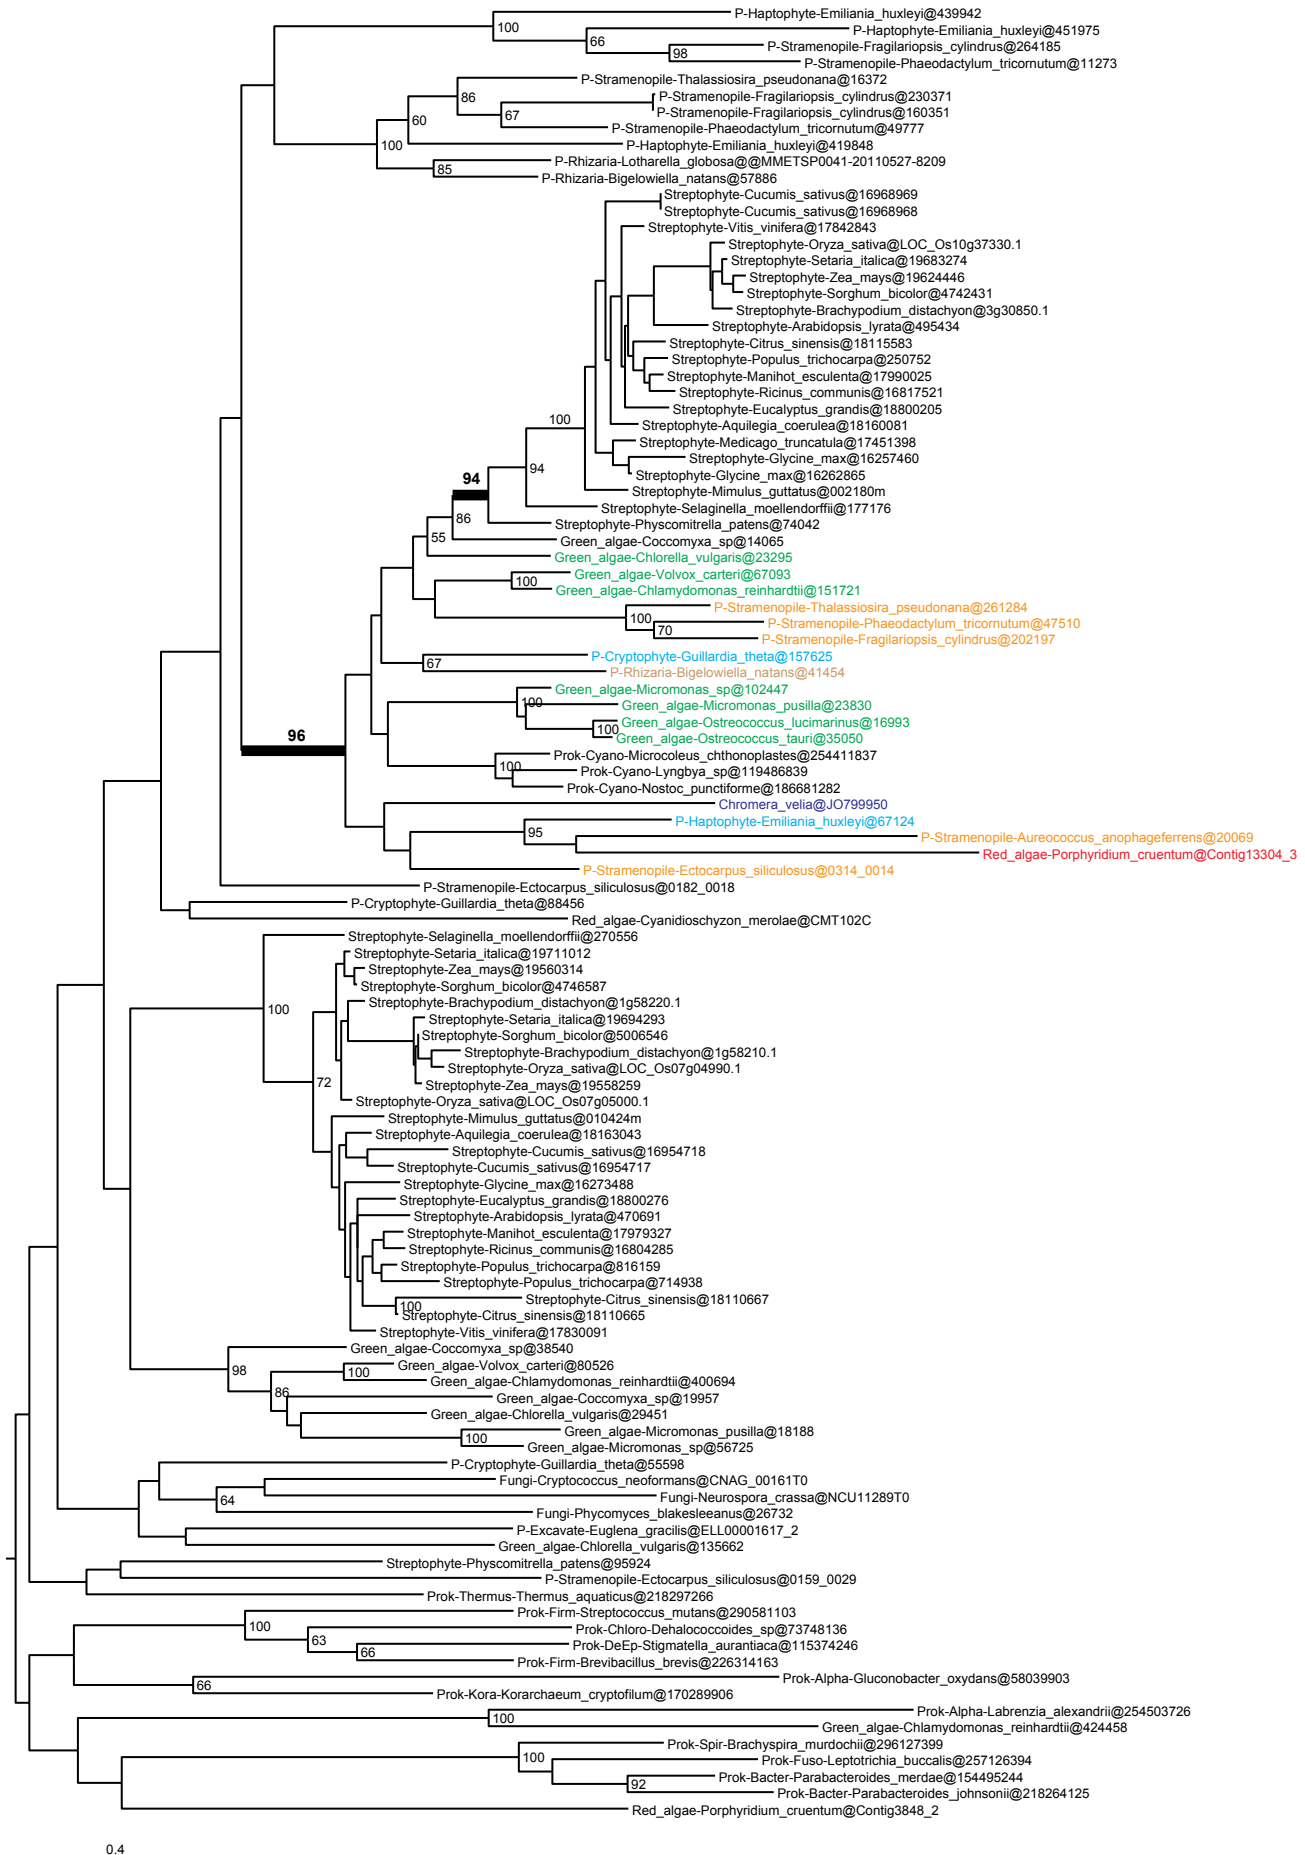

# JO802386: Amine oxidase

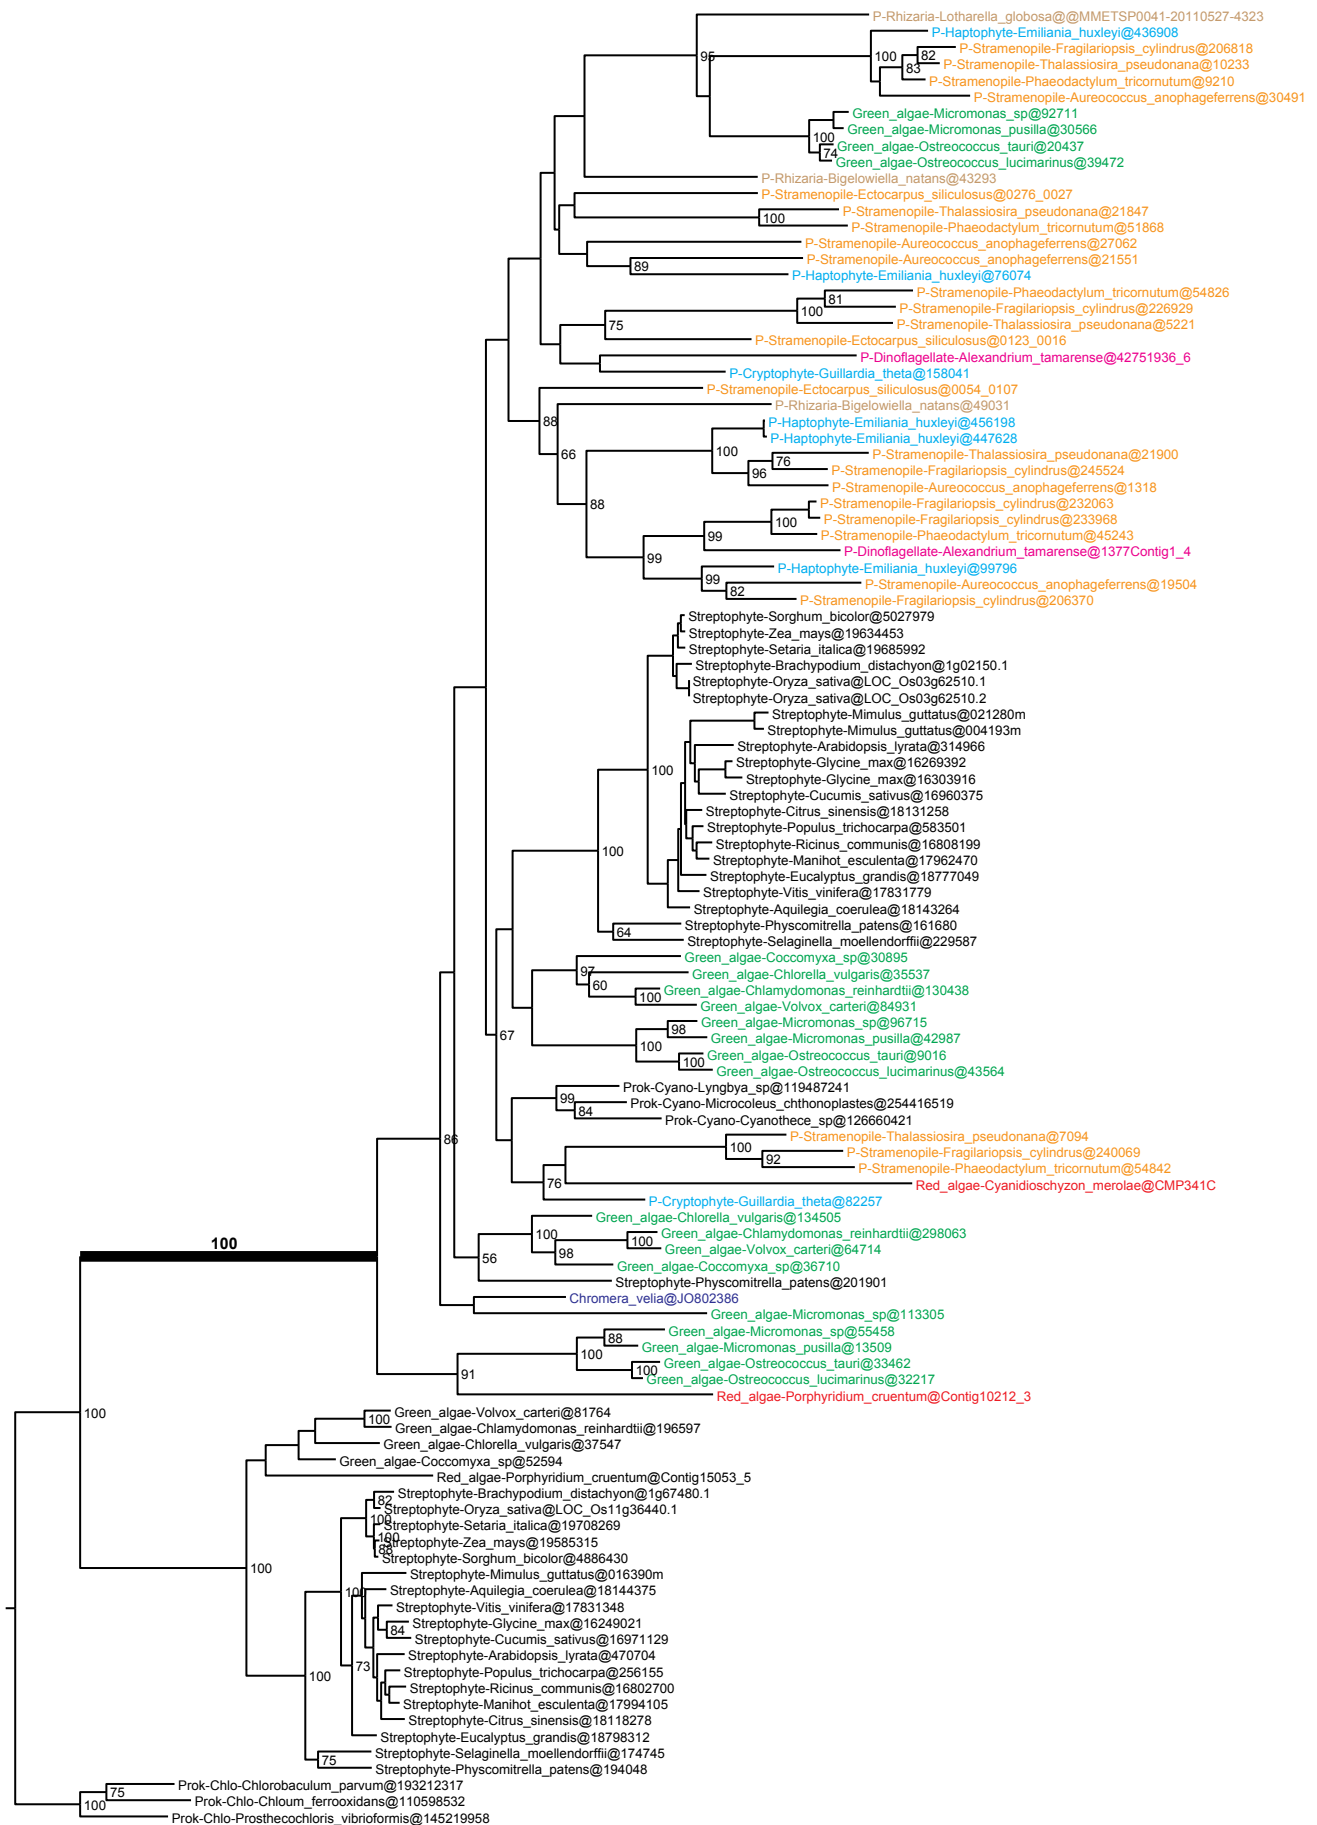

0.3

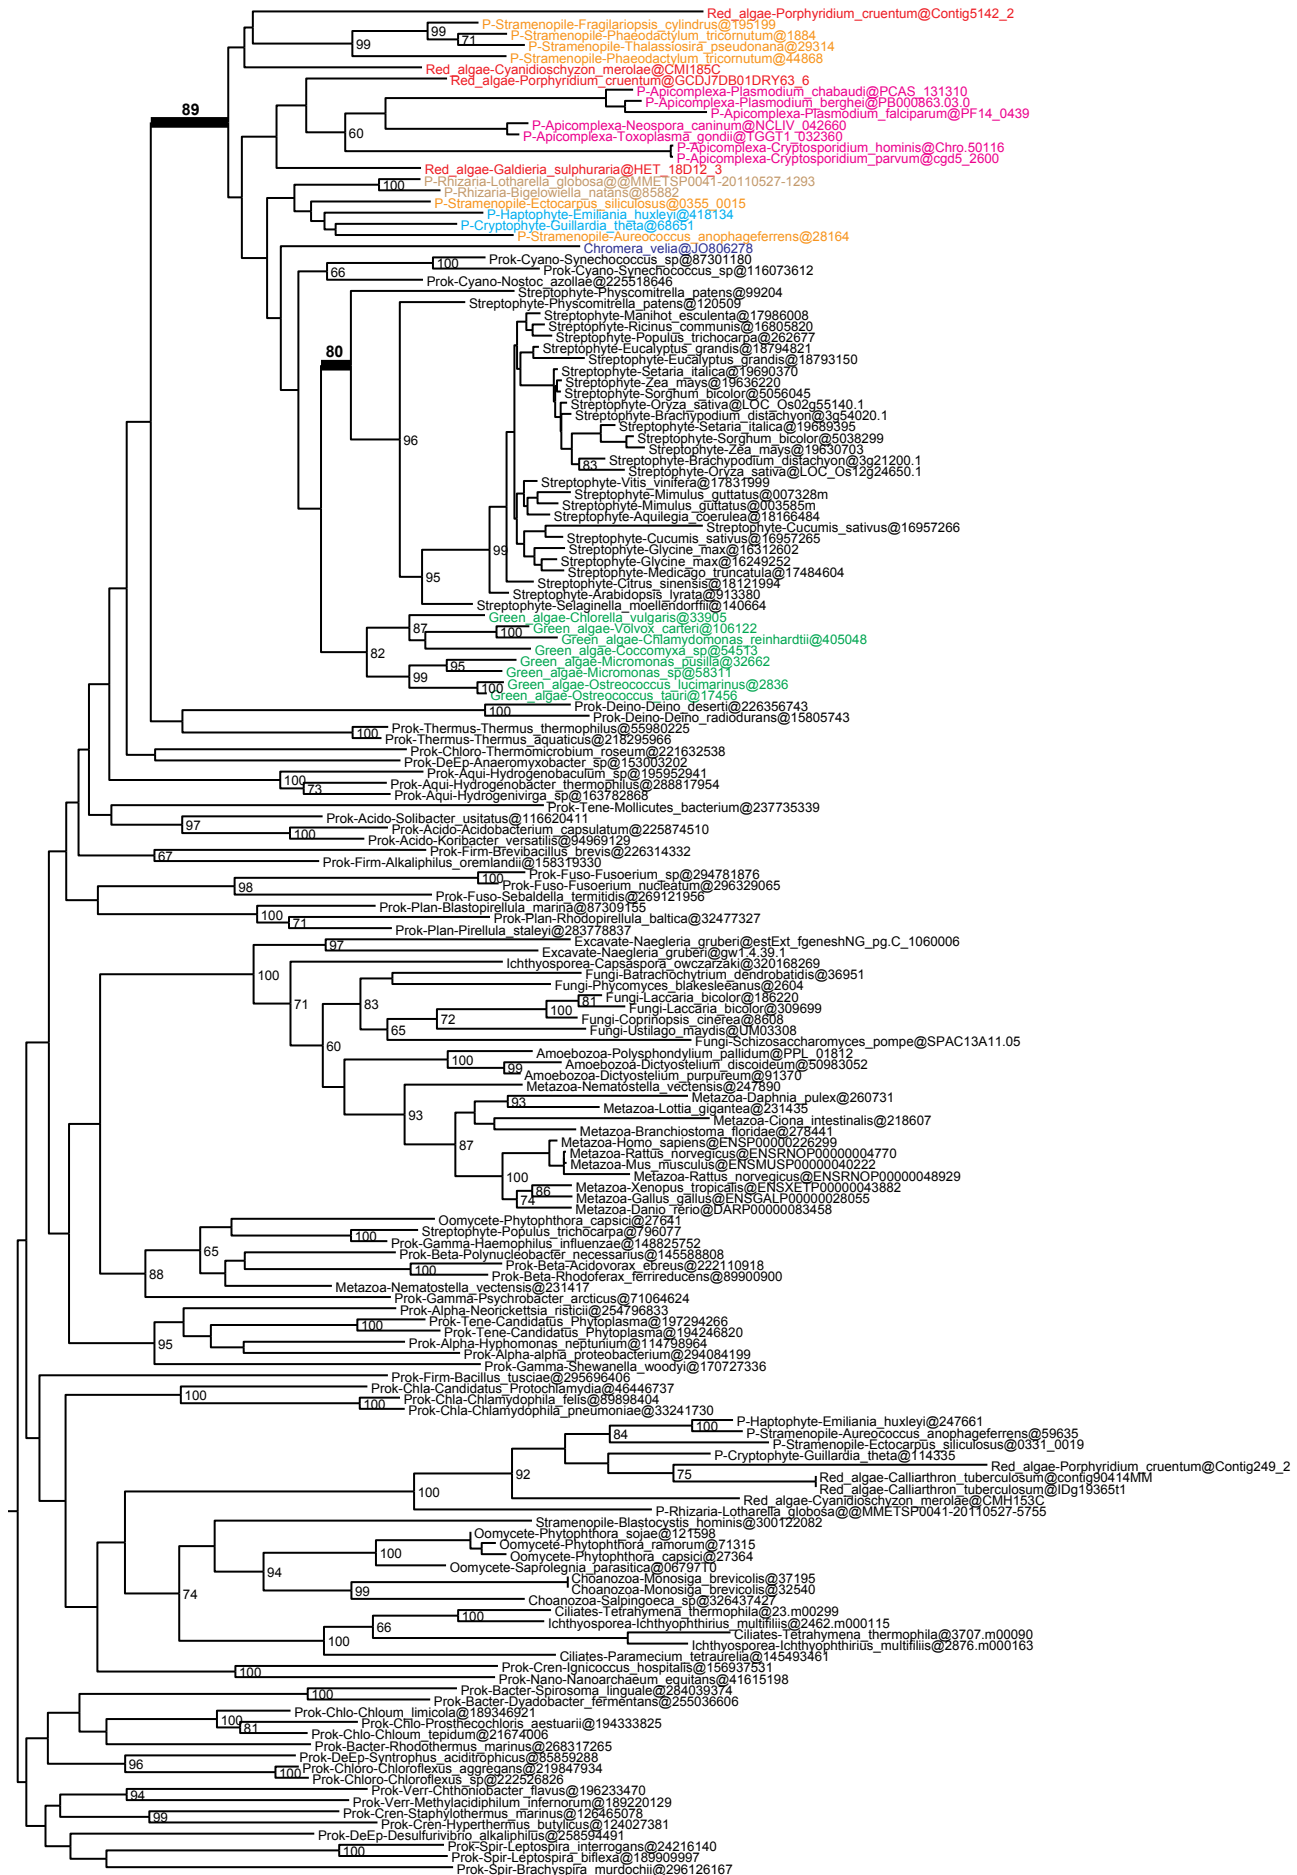

## JO806648: Phosphoserine aminotransferase

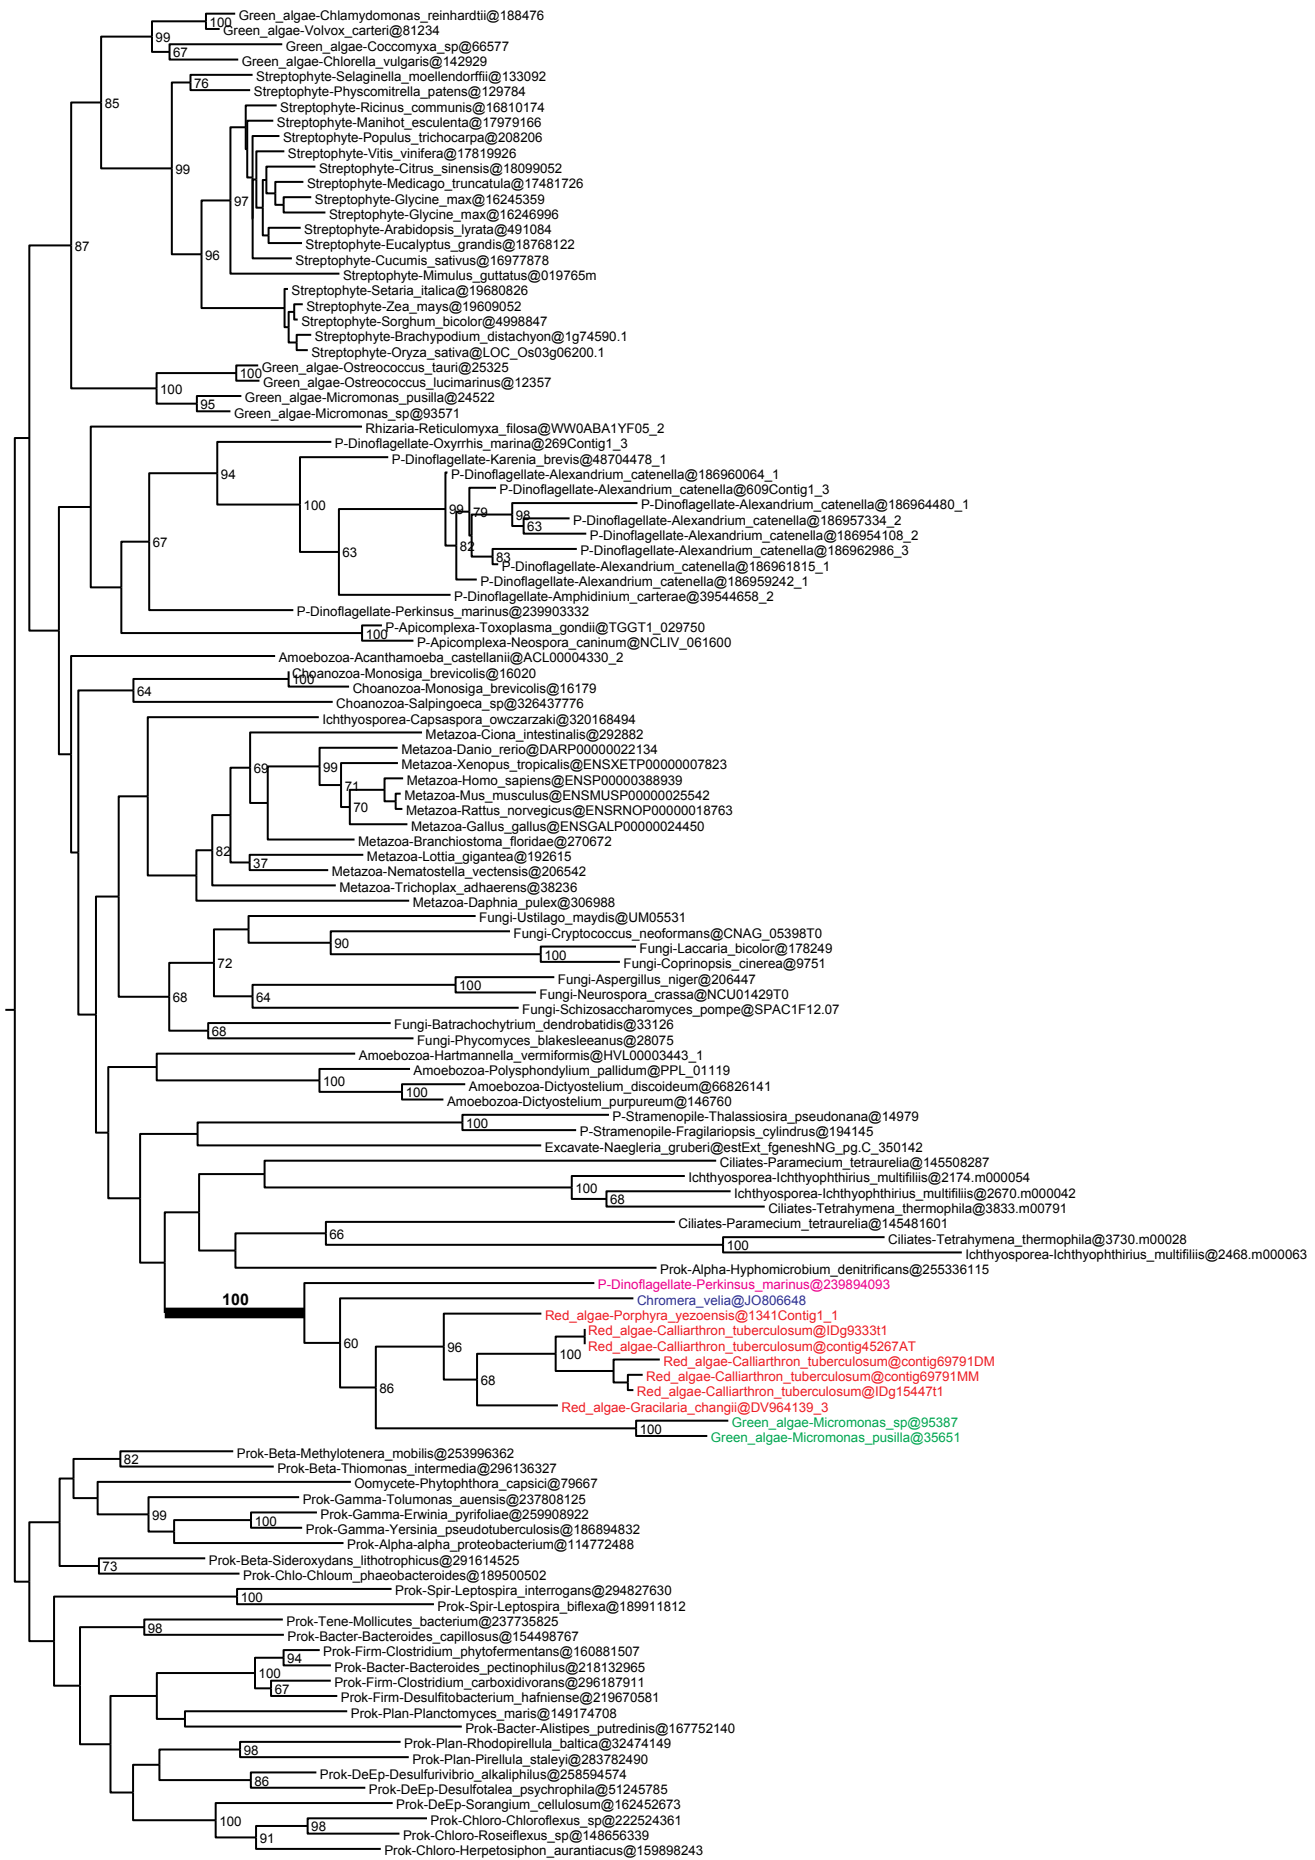

## 0.3

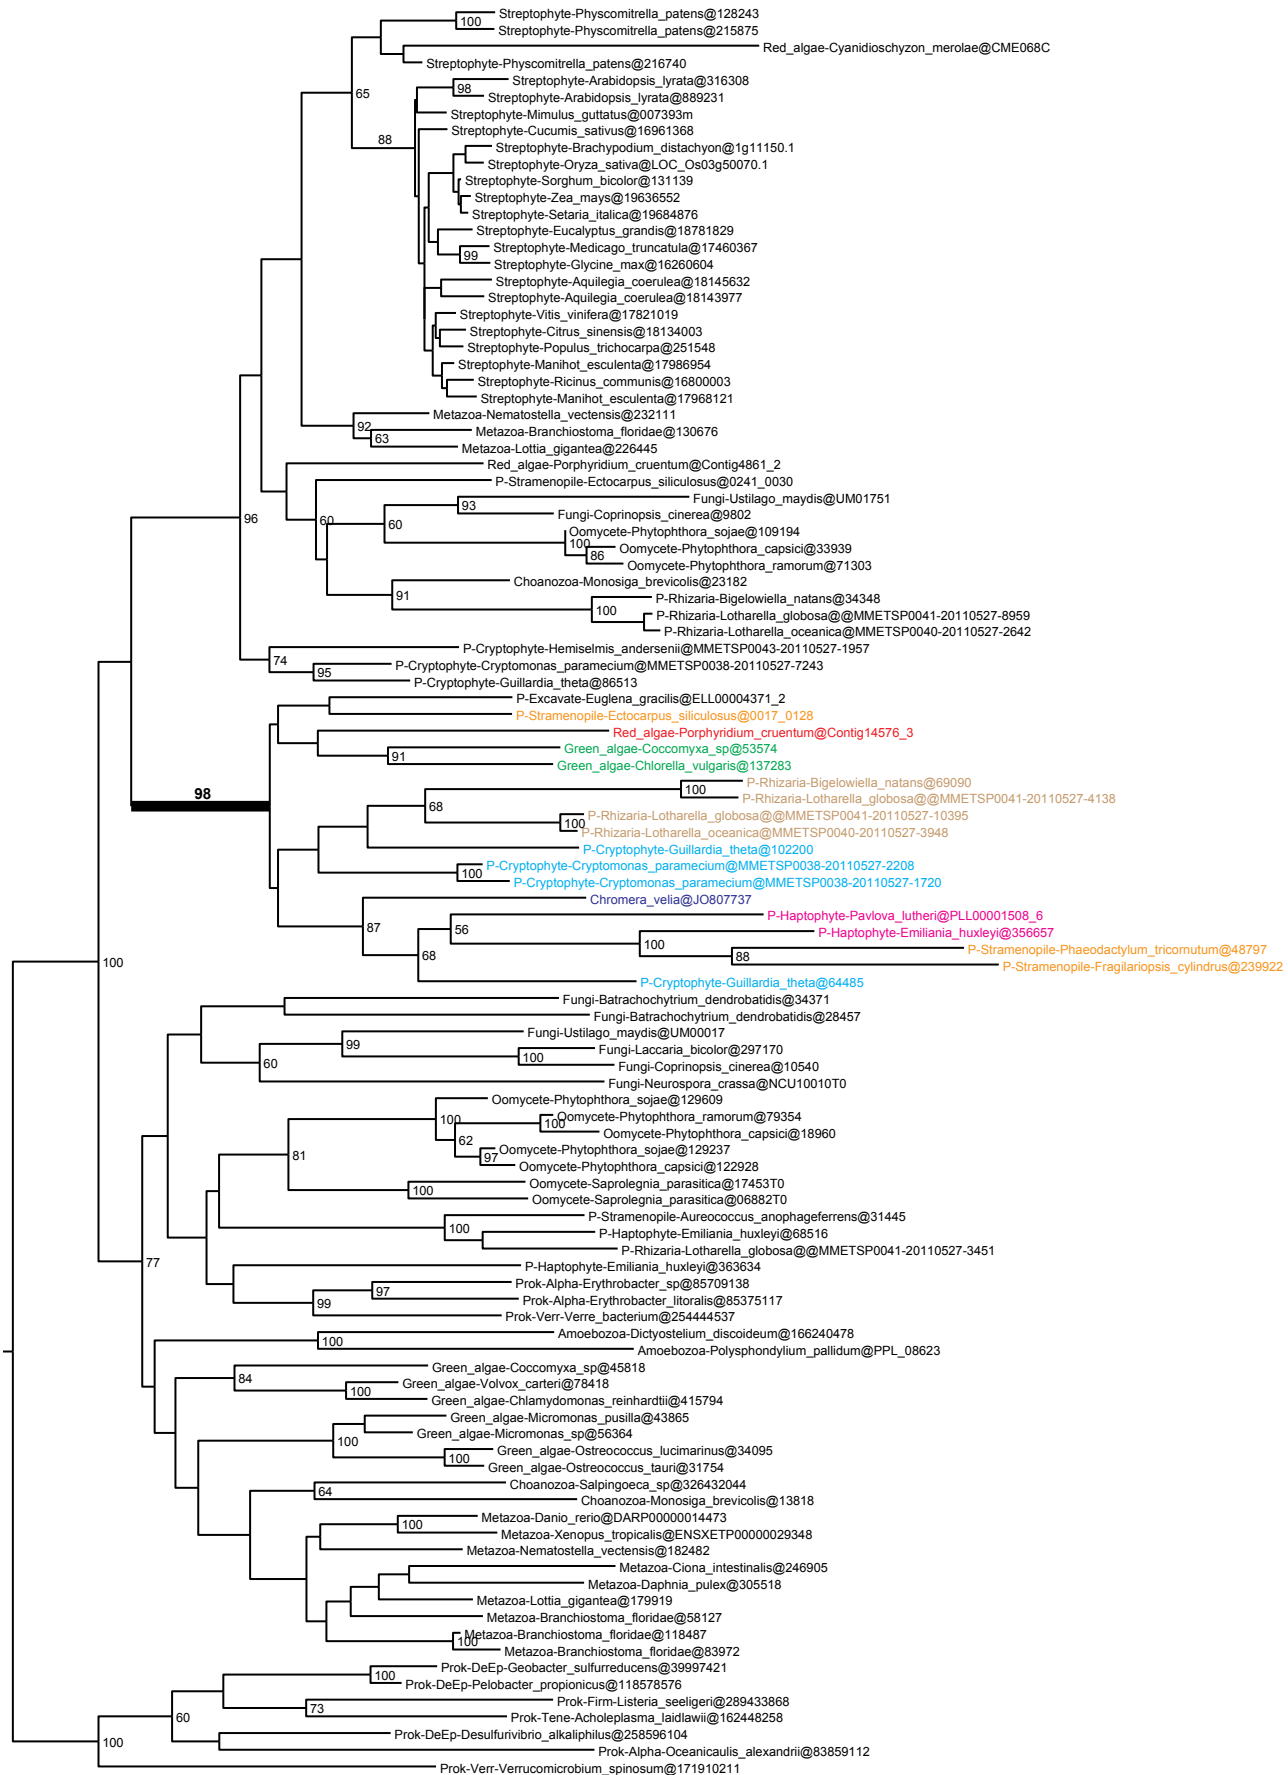

# JO814175: Methyltransferase type 11

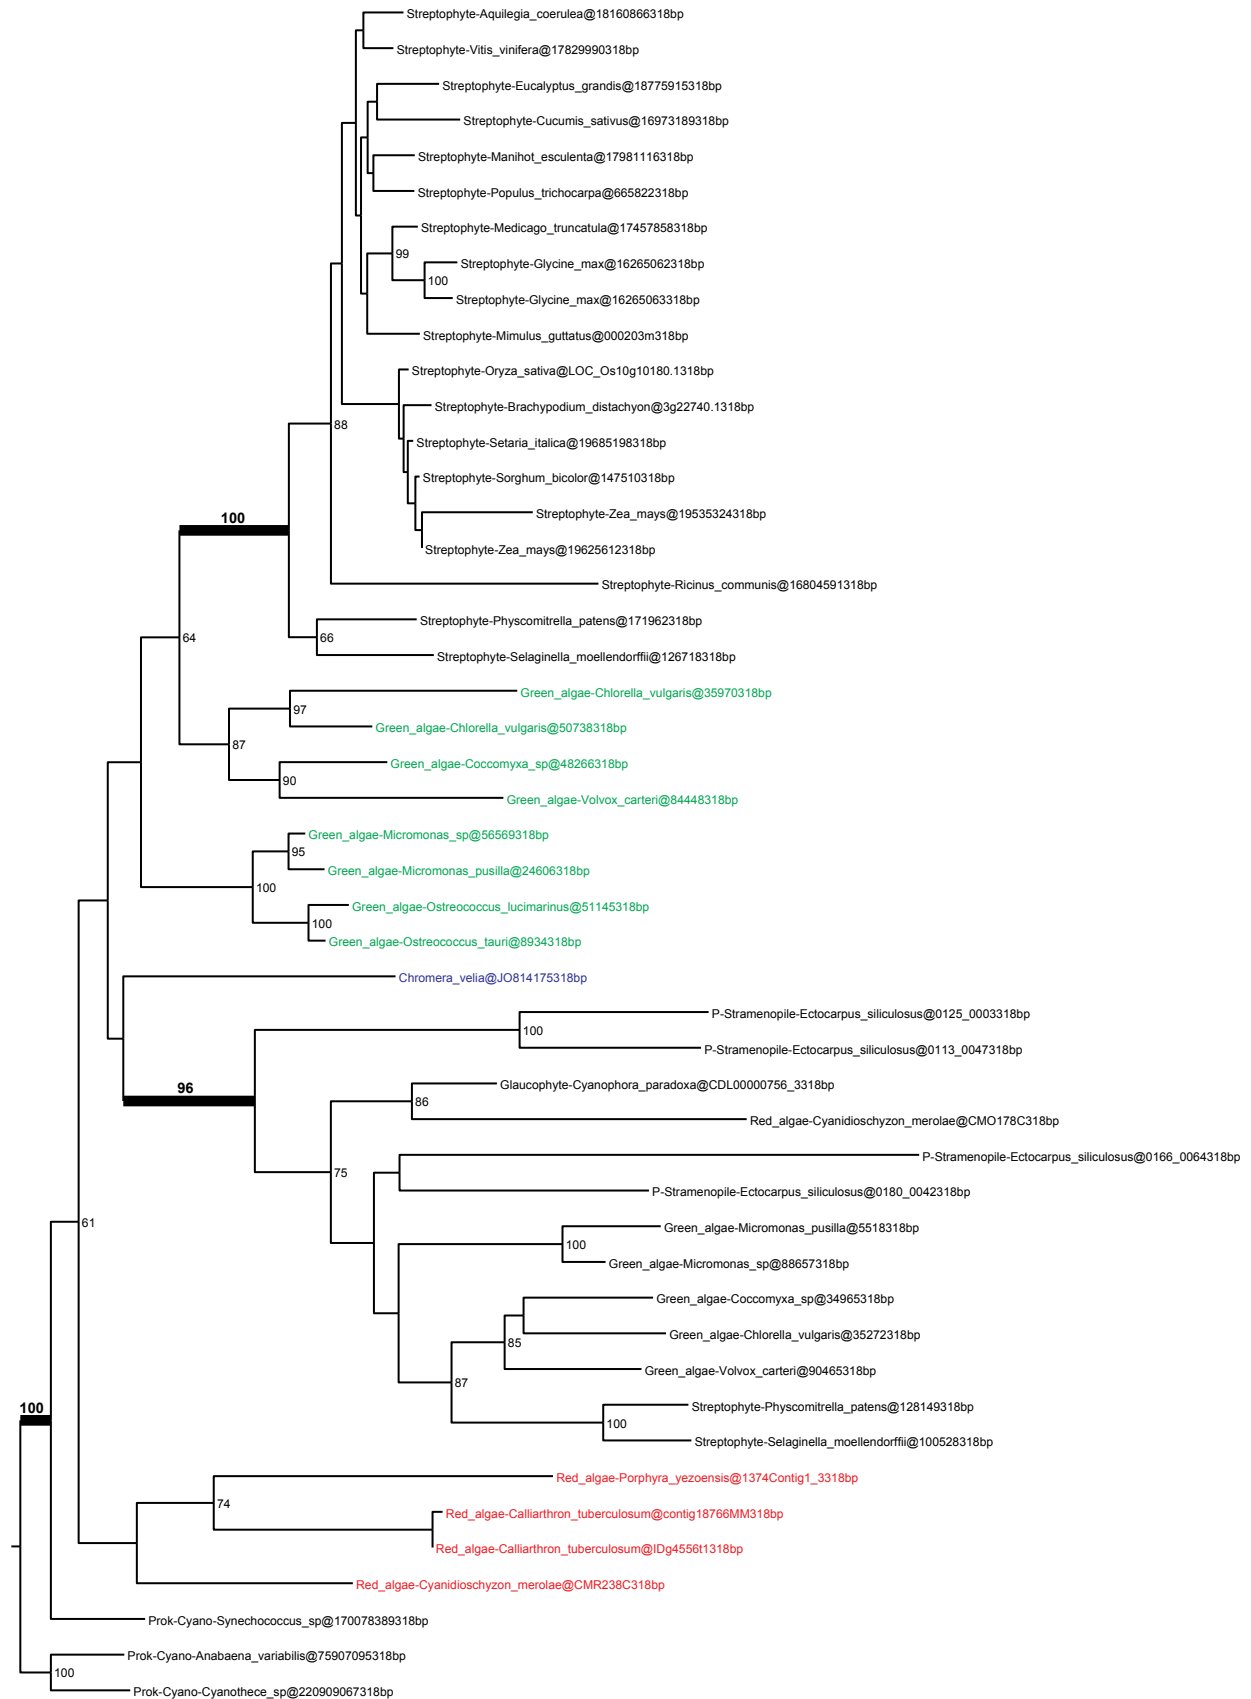

JO786743: No function prediction

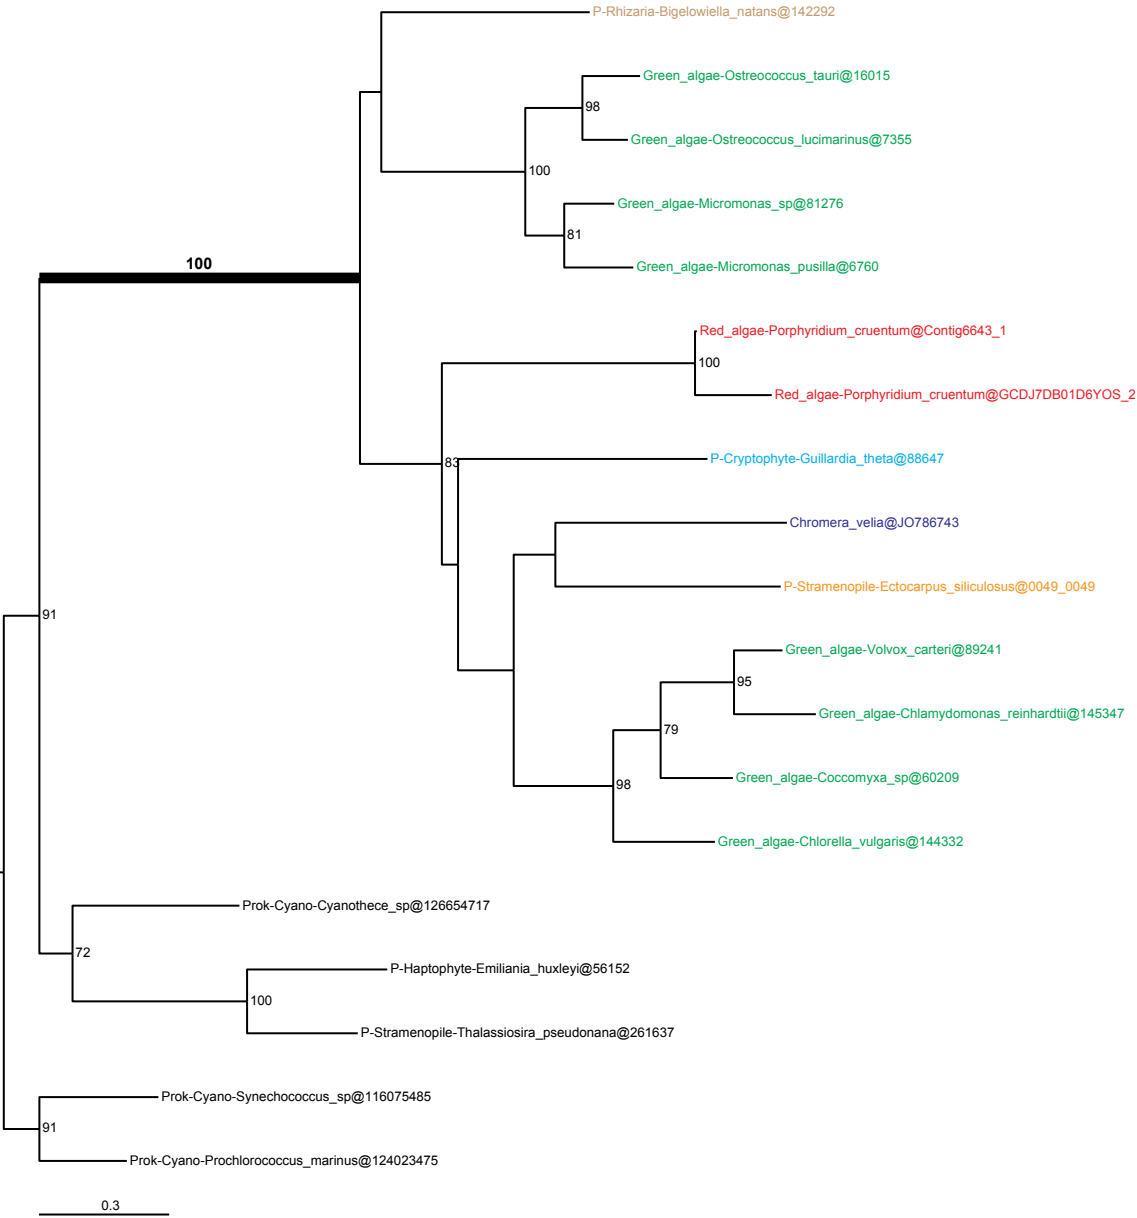

JO786721: Permeases of the major facilitator superfamily

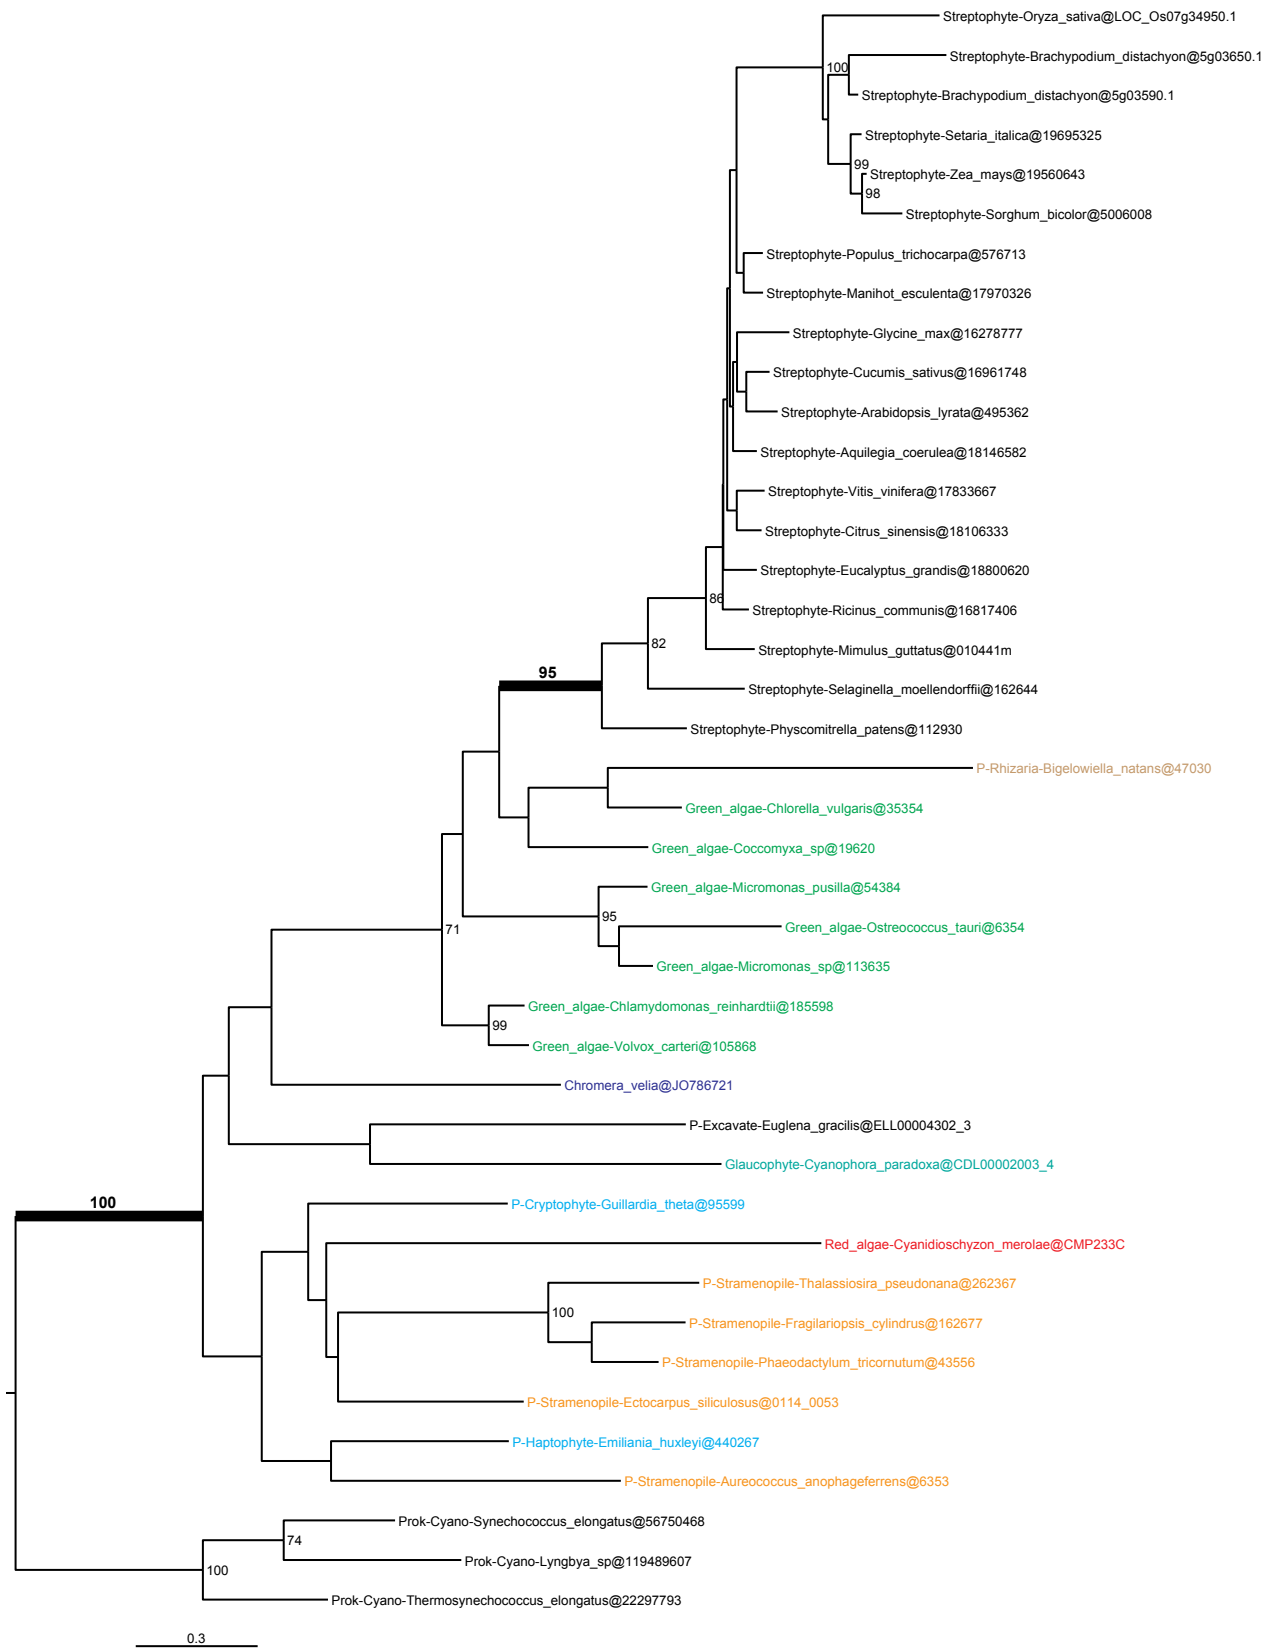

JO786758: Plastid terminal oxidase

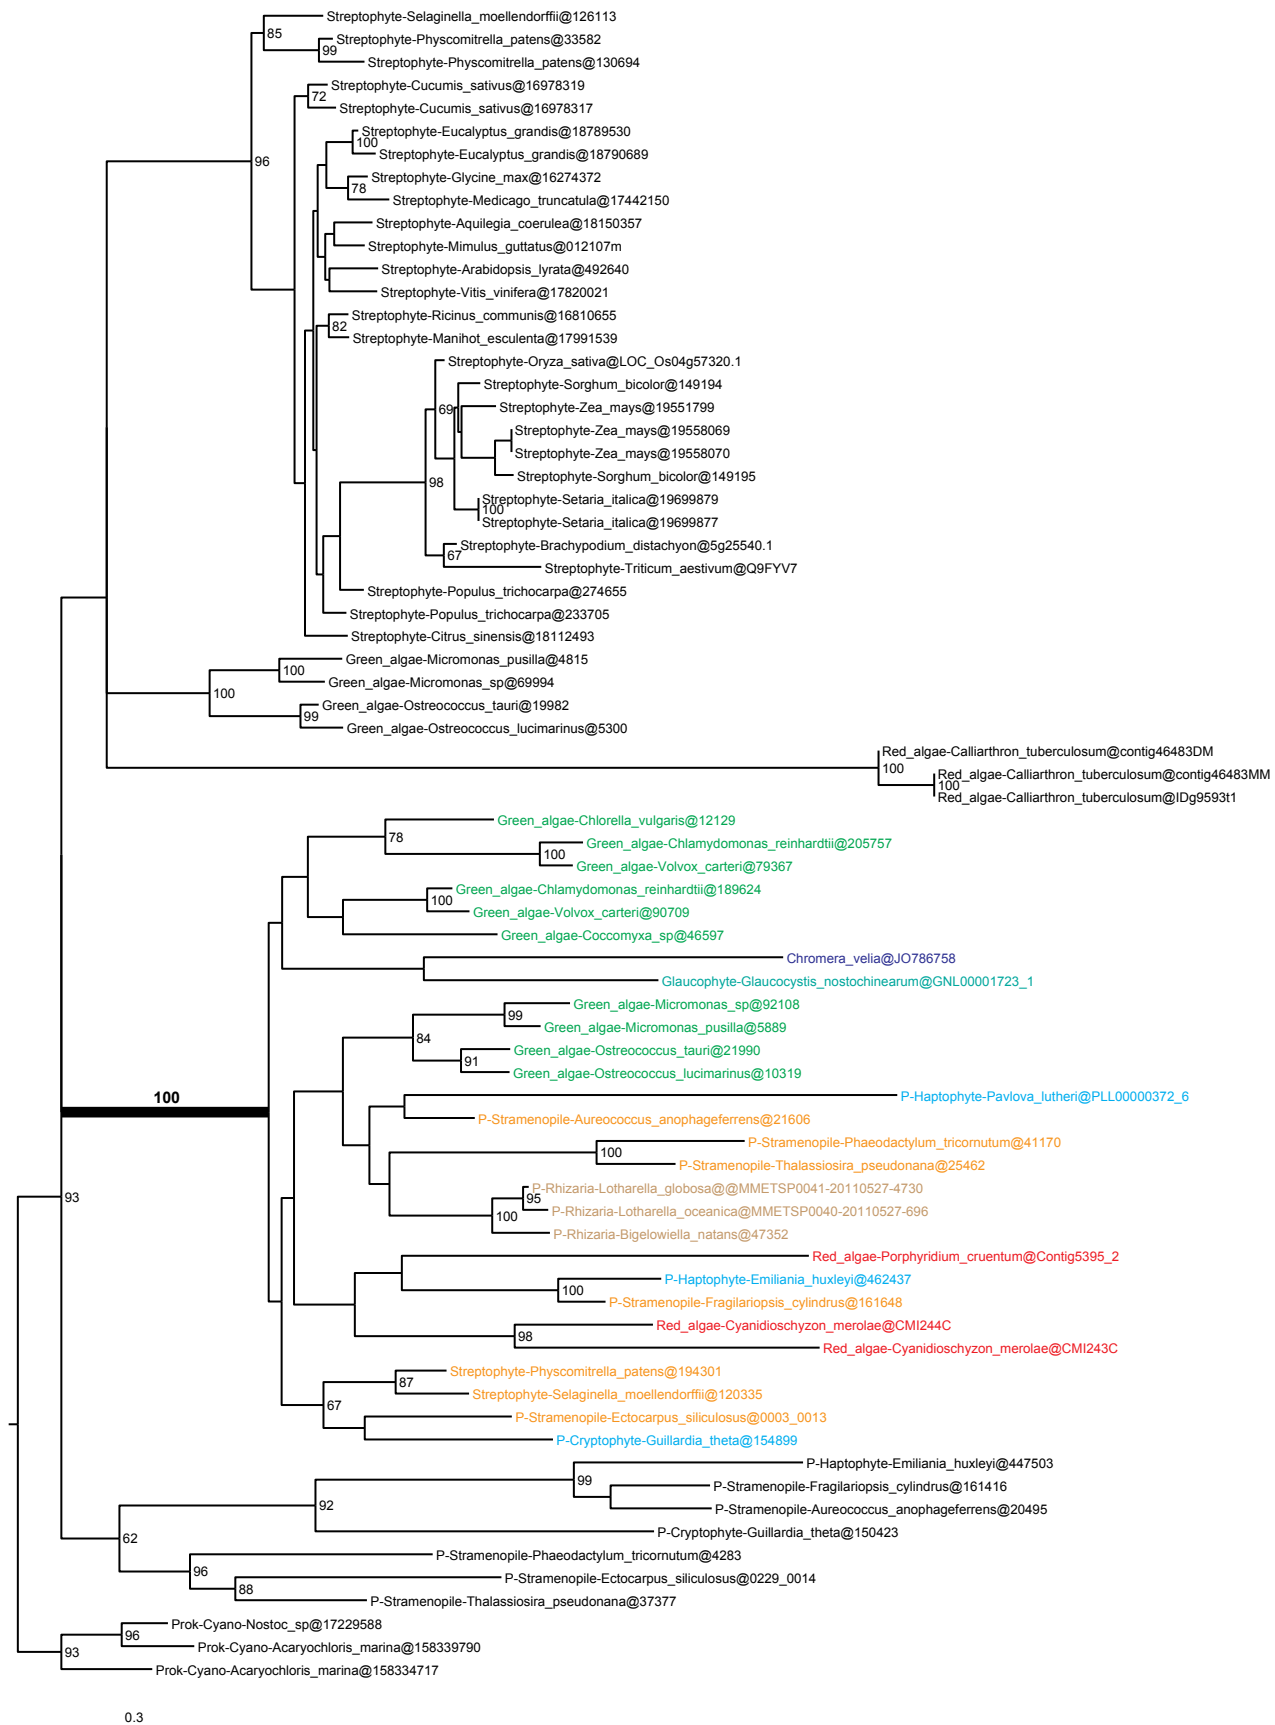

# JO786792: Methyltransferase type 11

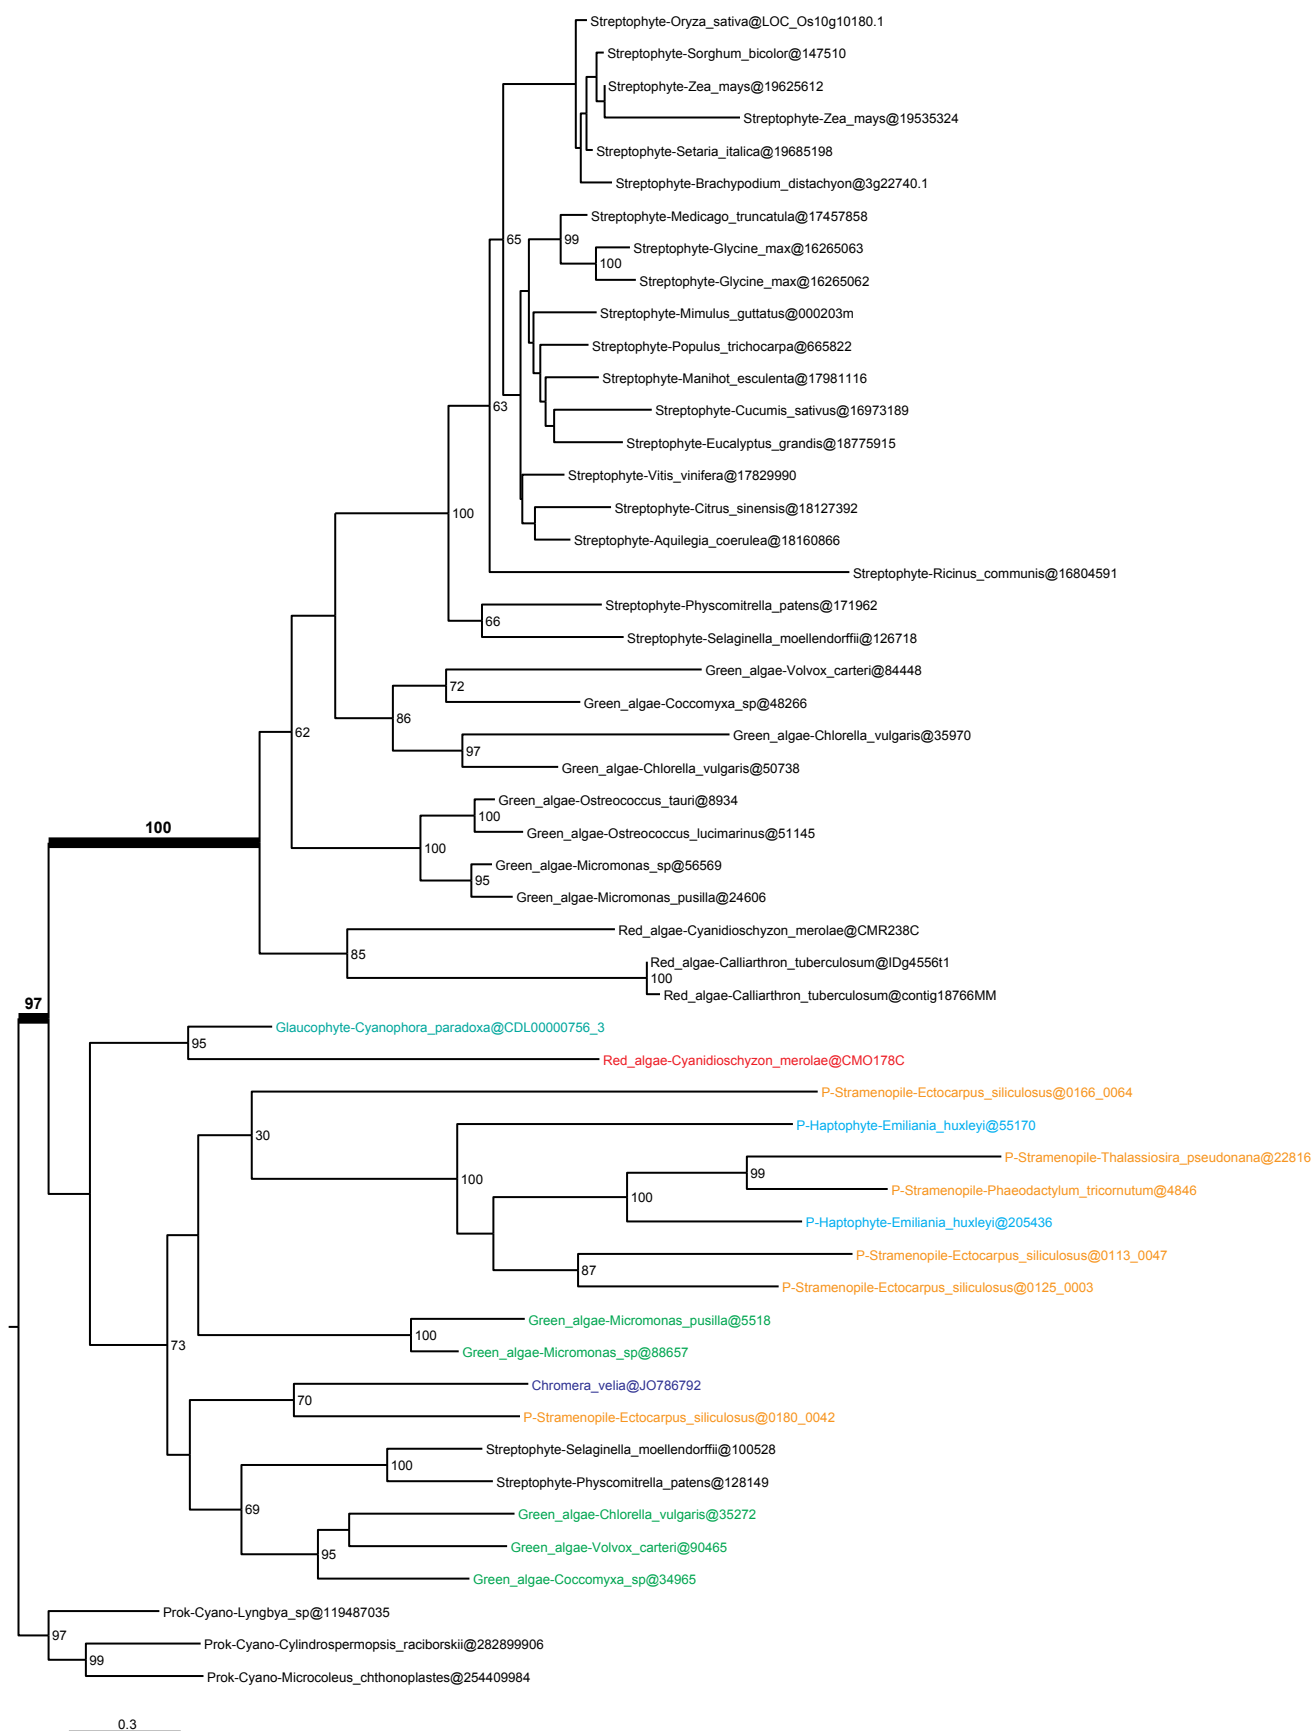

# JO786874: Tryptophanyl-tRNA synthetase

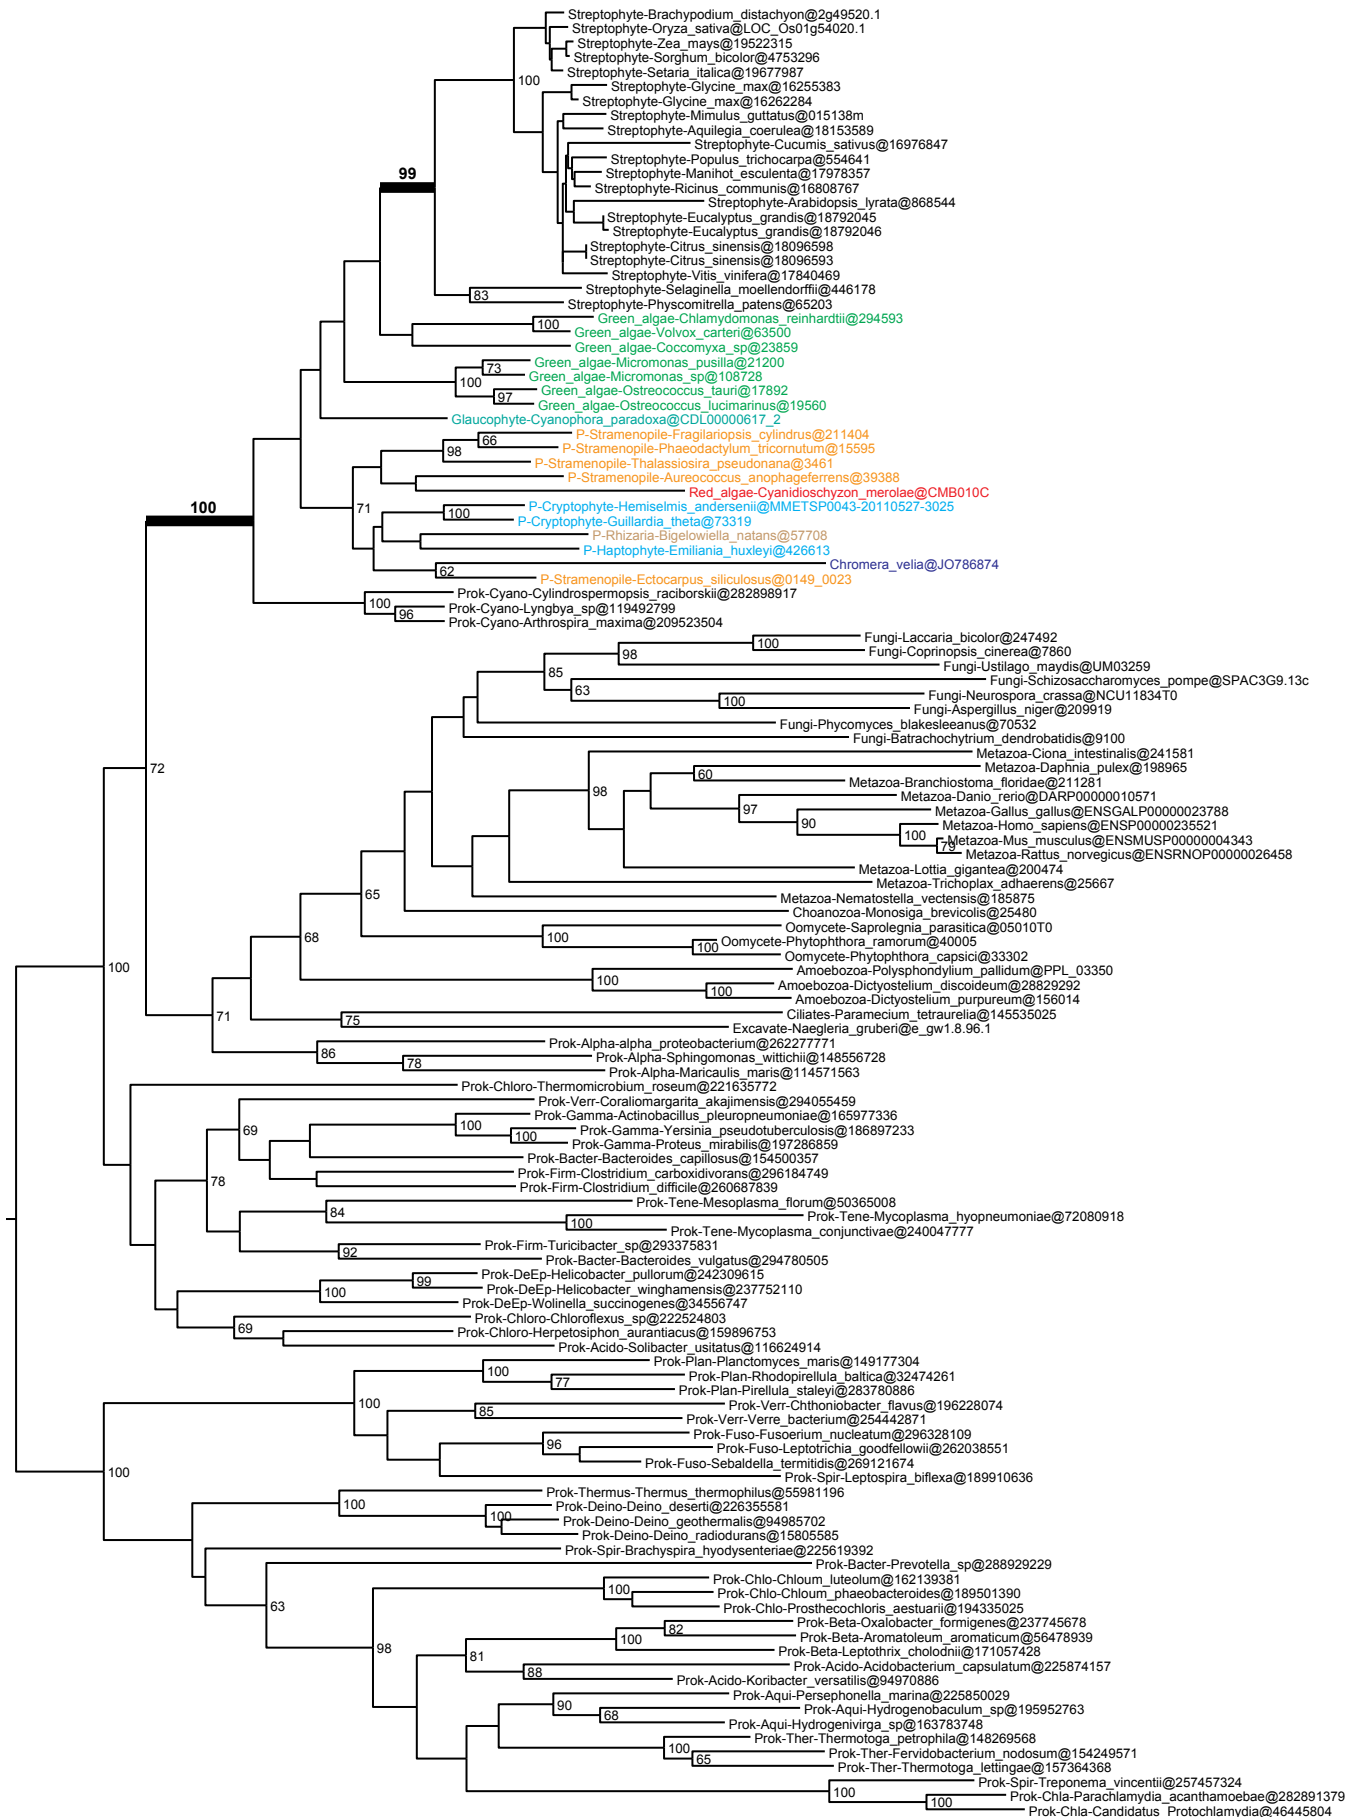

JO803256: Chlorophyll synthetase

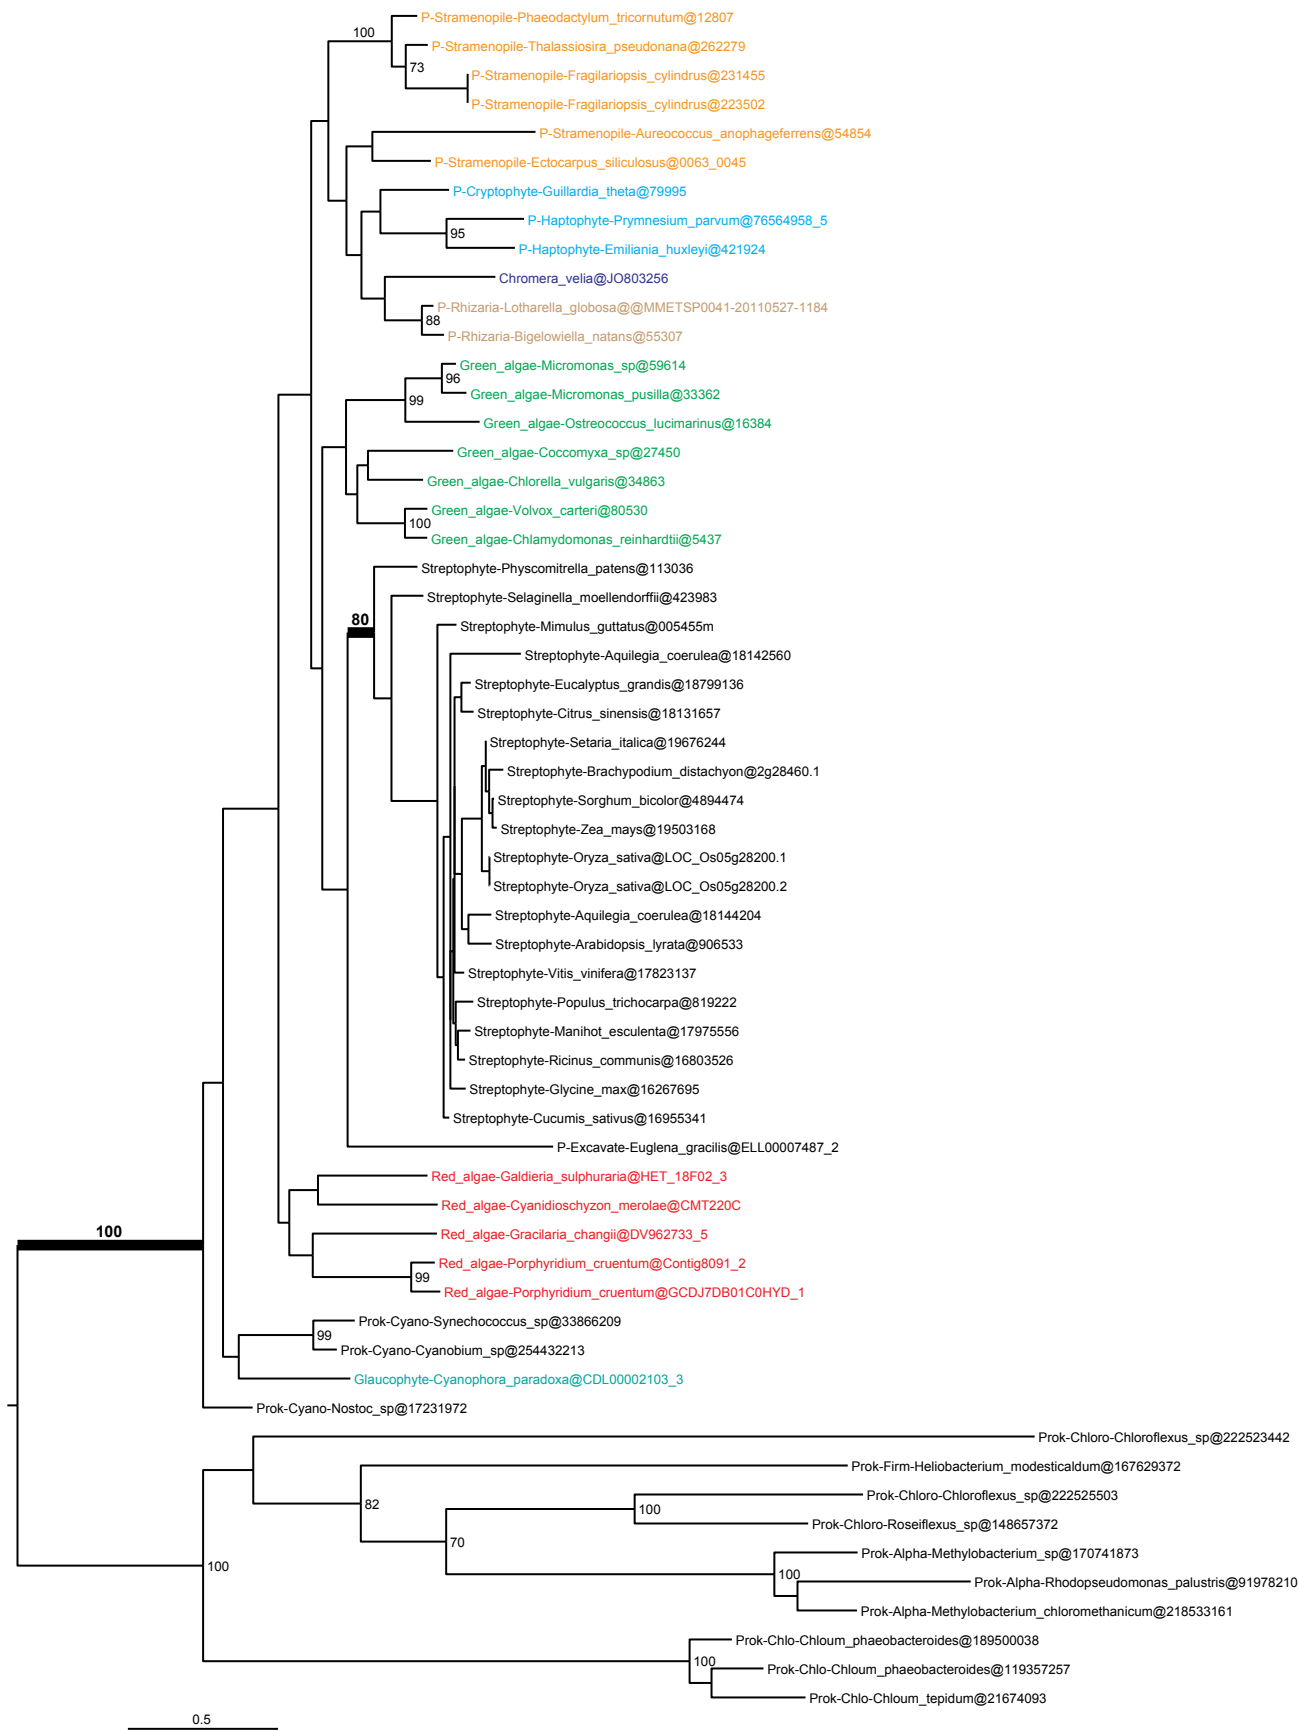

Supplement: evs049_Supplementary_Data.zip [file evs049_Supplementary_Data.zip › FigureS4.pdf]
