# Supplementary material for: Re-evaluating the Green versus Red Signal in Eukaryotes with Secondary Plastid of Red Algal Origin
Source: Oxford University Press journal article supplement (doi:10.1093/gbe/evs049), 2012-01-01
Supplement: evs049_Supplementary_Data.zip [file evs049_Supplementary_Data.zip]

Archive with 11 entries (11 files):
- Supplemental_material_tables_figures.pdf
- TableS3.xls
- FigureS1.pdf
- FigureS5.pdf
- TableS2.xls
- FigureS6.pdf
- FigureS2.pdf
- FigureS4.pdf
- TableS1.xls
- FigureS3.pdf
- Supplementary_figure_legends.doc
