# Supplementary material for: Re-evaluating the Green versus Red Signal in Eukaryotes with Secondary Plastid of Red Algal Origin
Source: Oxford University Press journal article supplement (doi:10.1093/gbe/evs049), 2012-01-01

HO865203: No function prediction

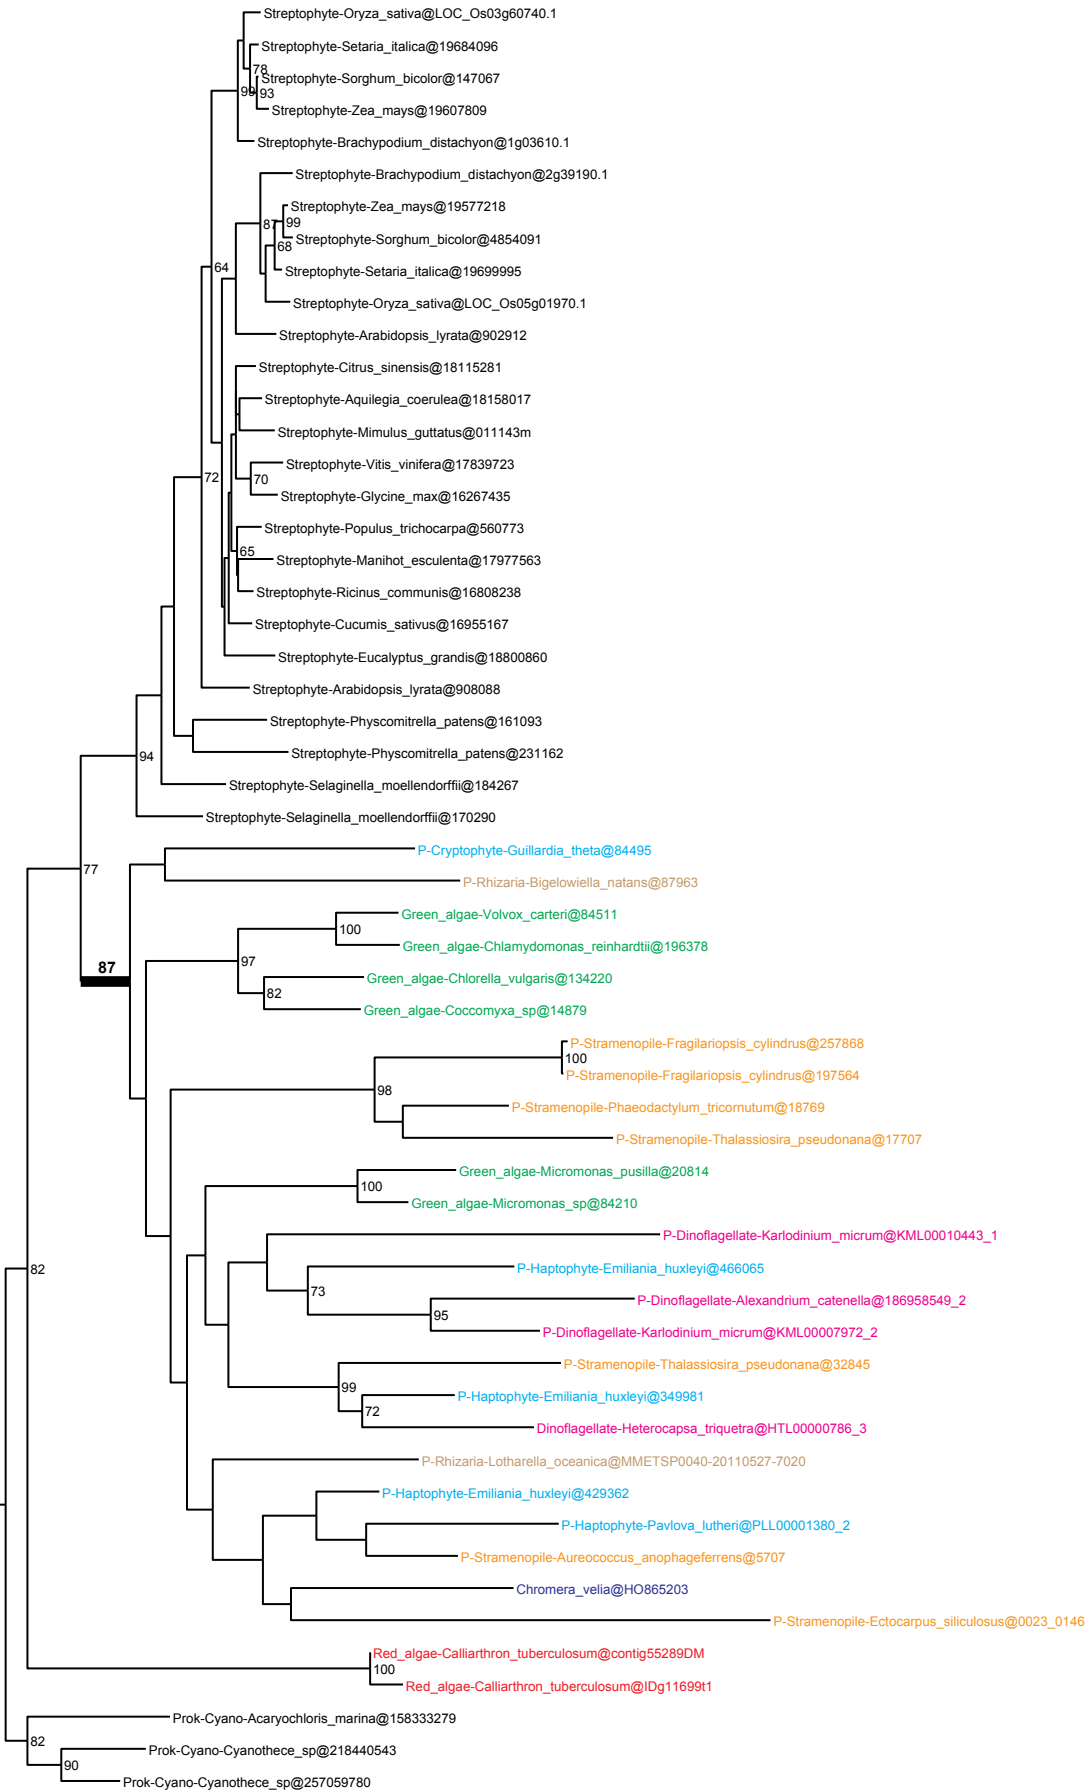

# JO786726: Coproporphyrinogen iii oxidase

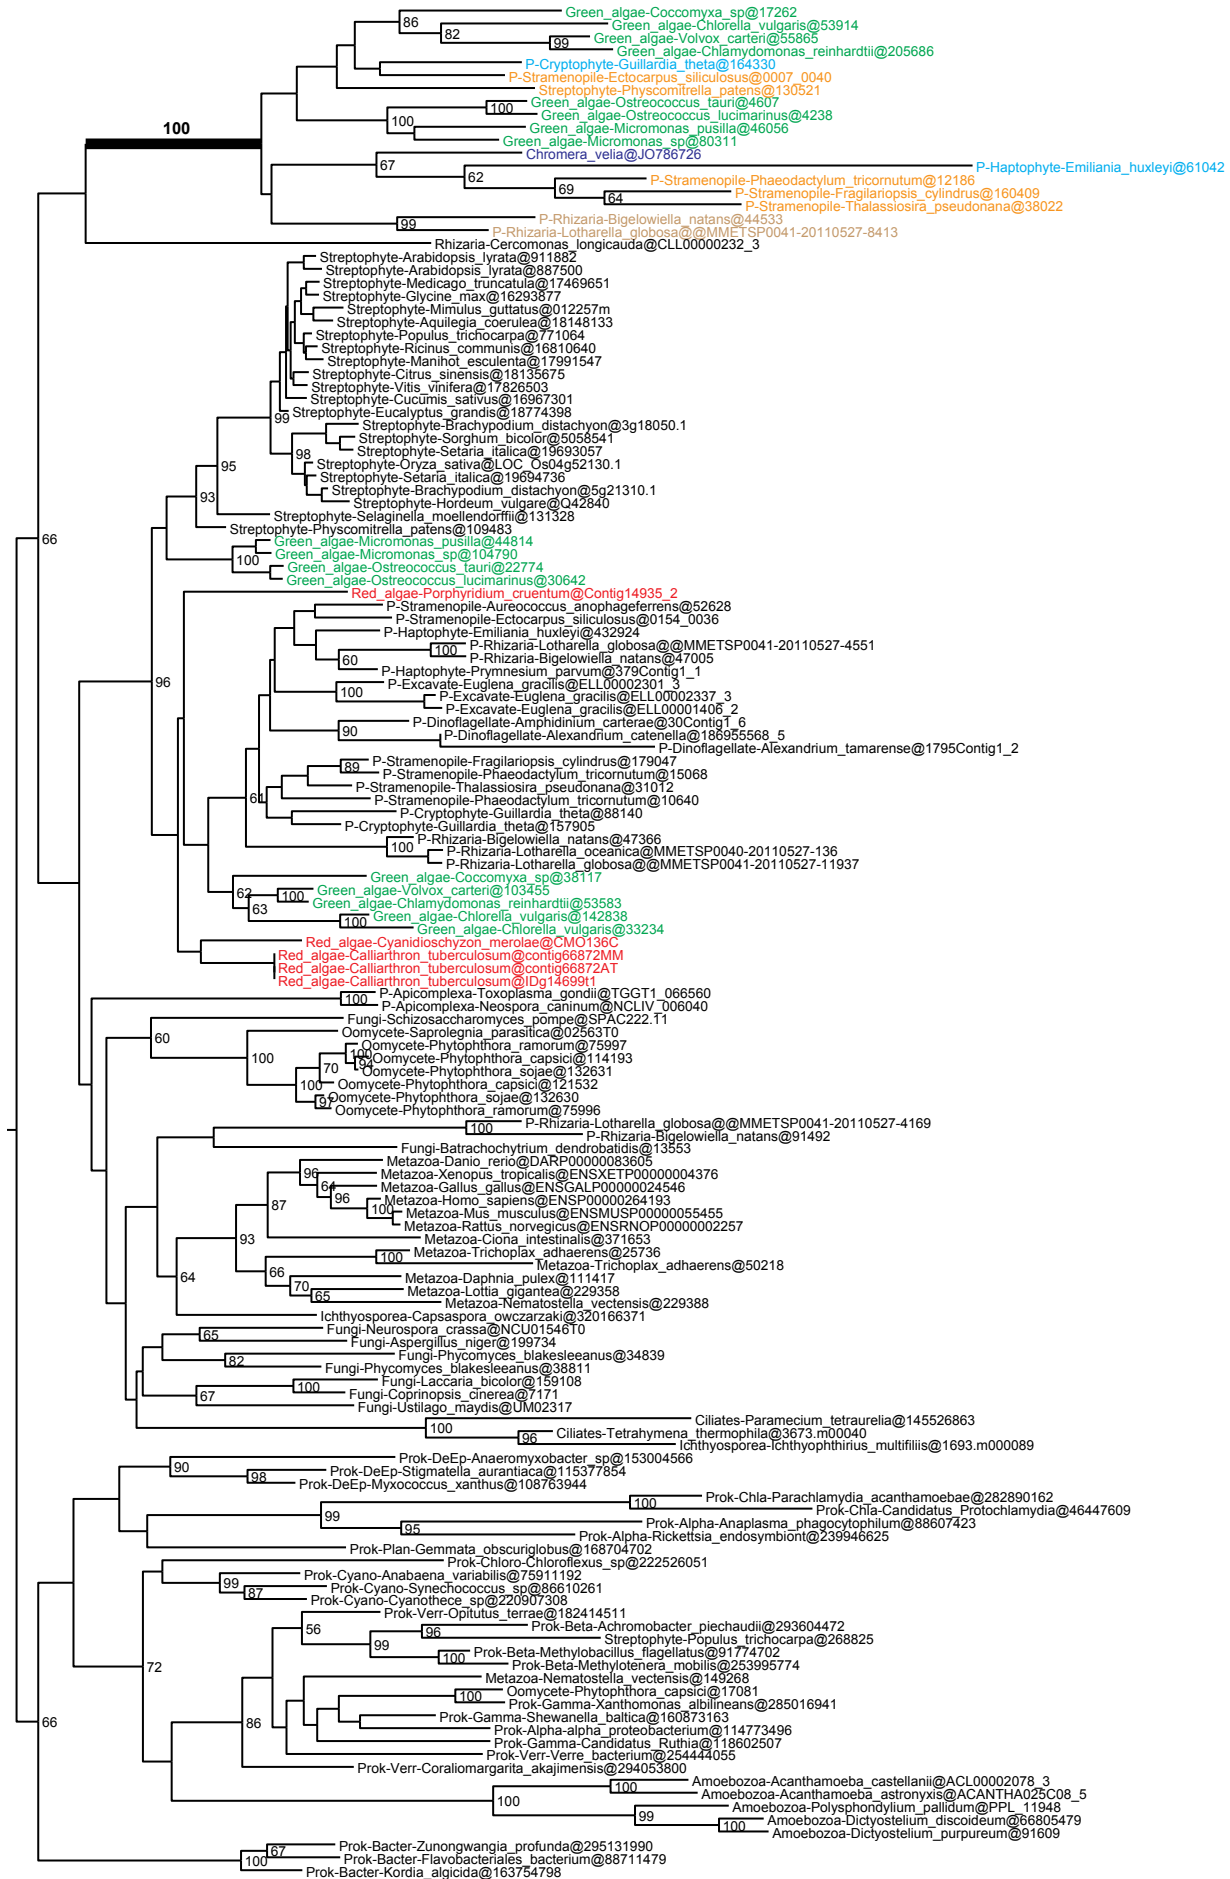

# JO786781: No function prediction

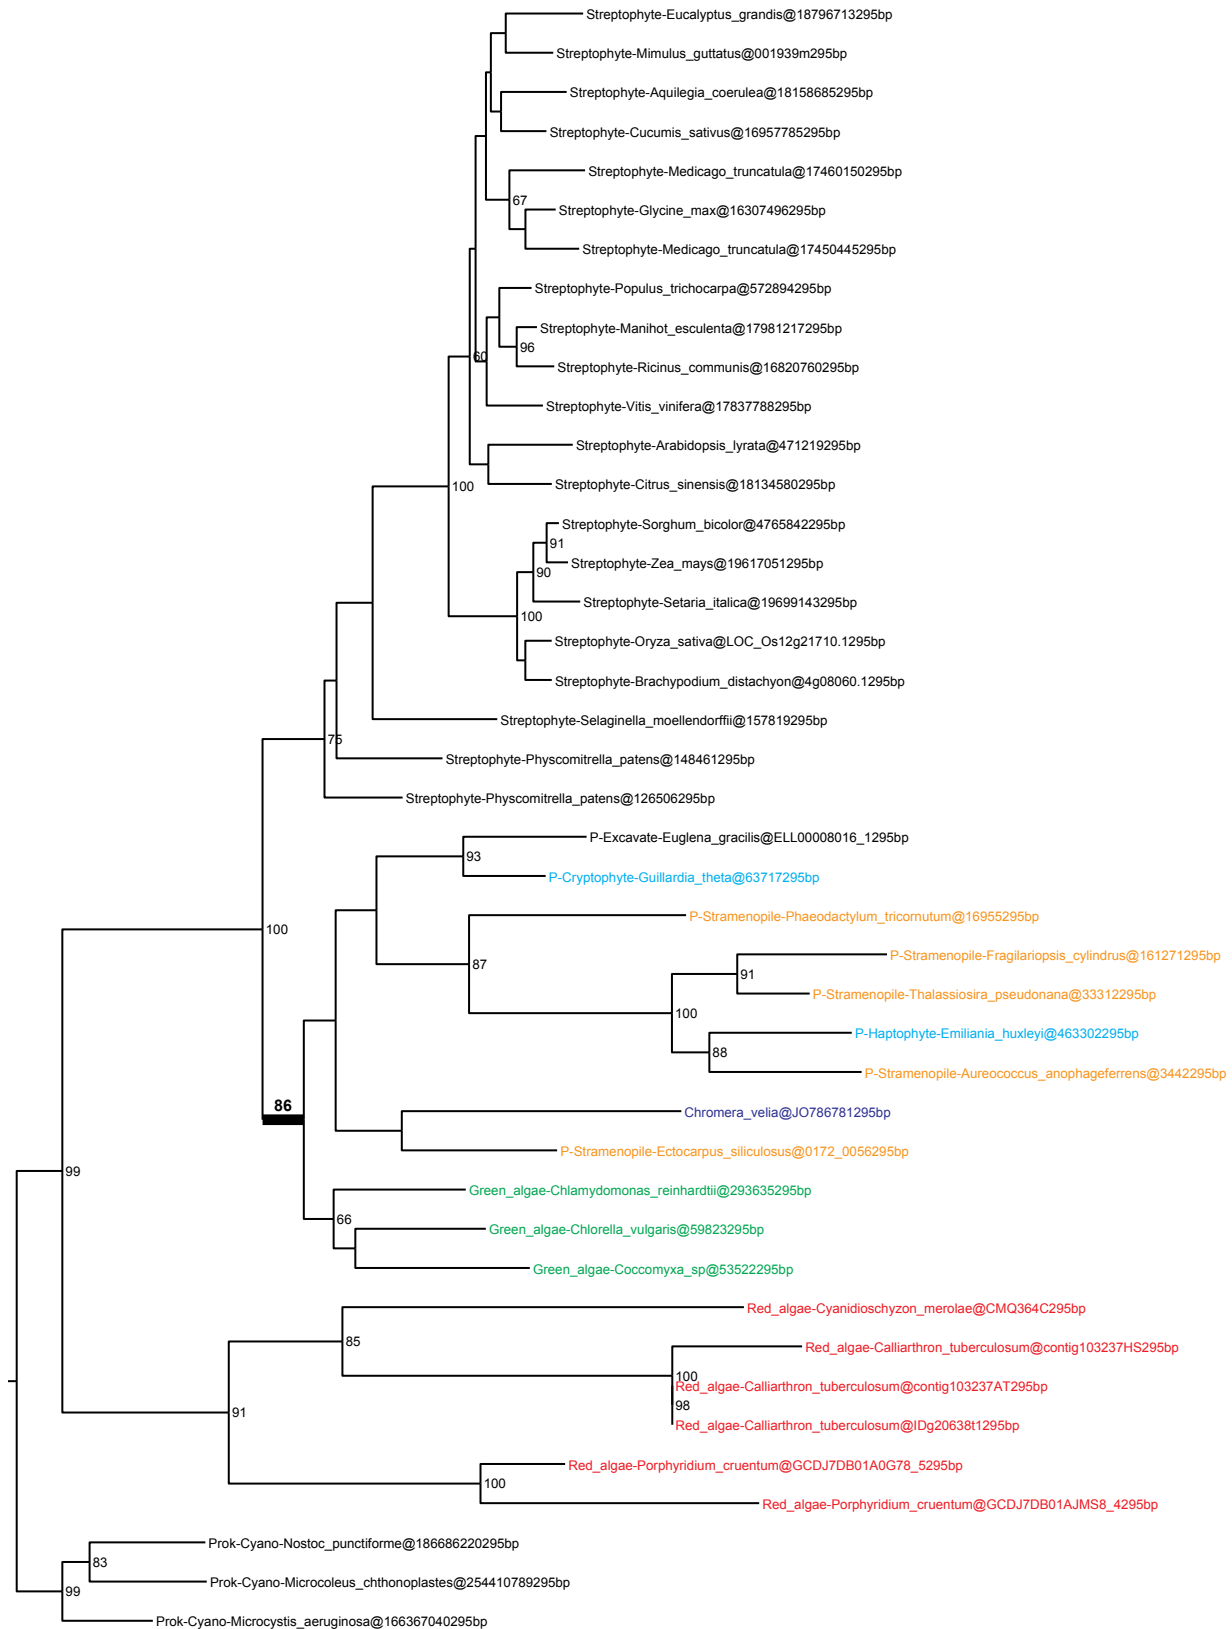

0.3

JO786871: Gun4 domain protein

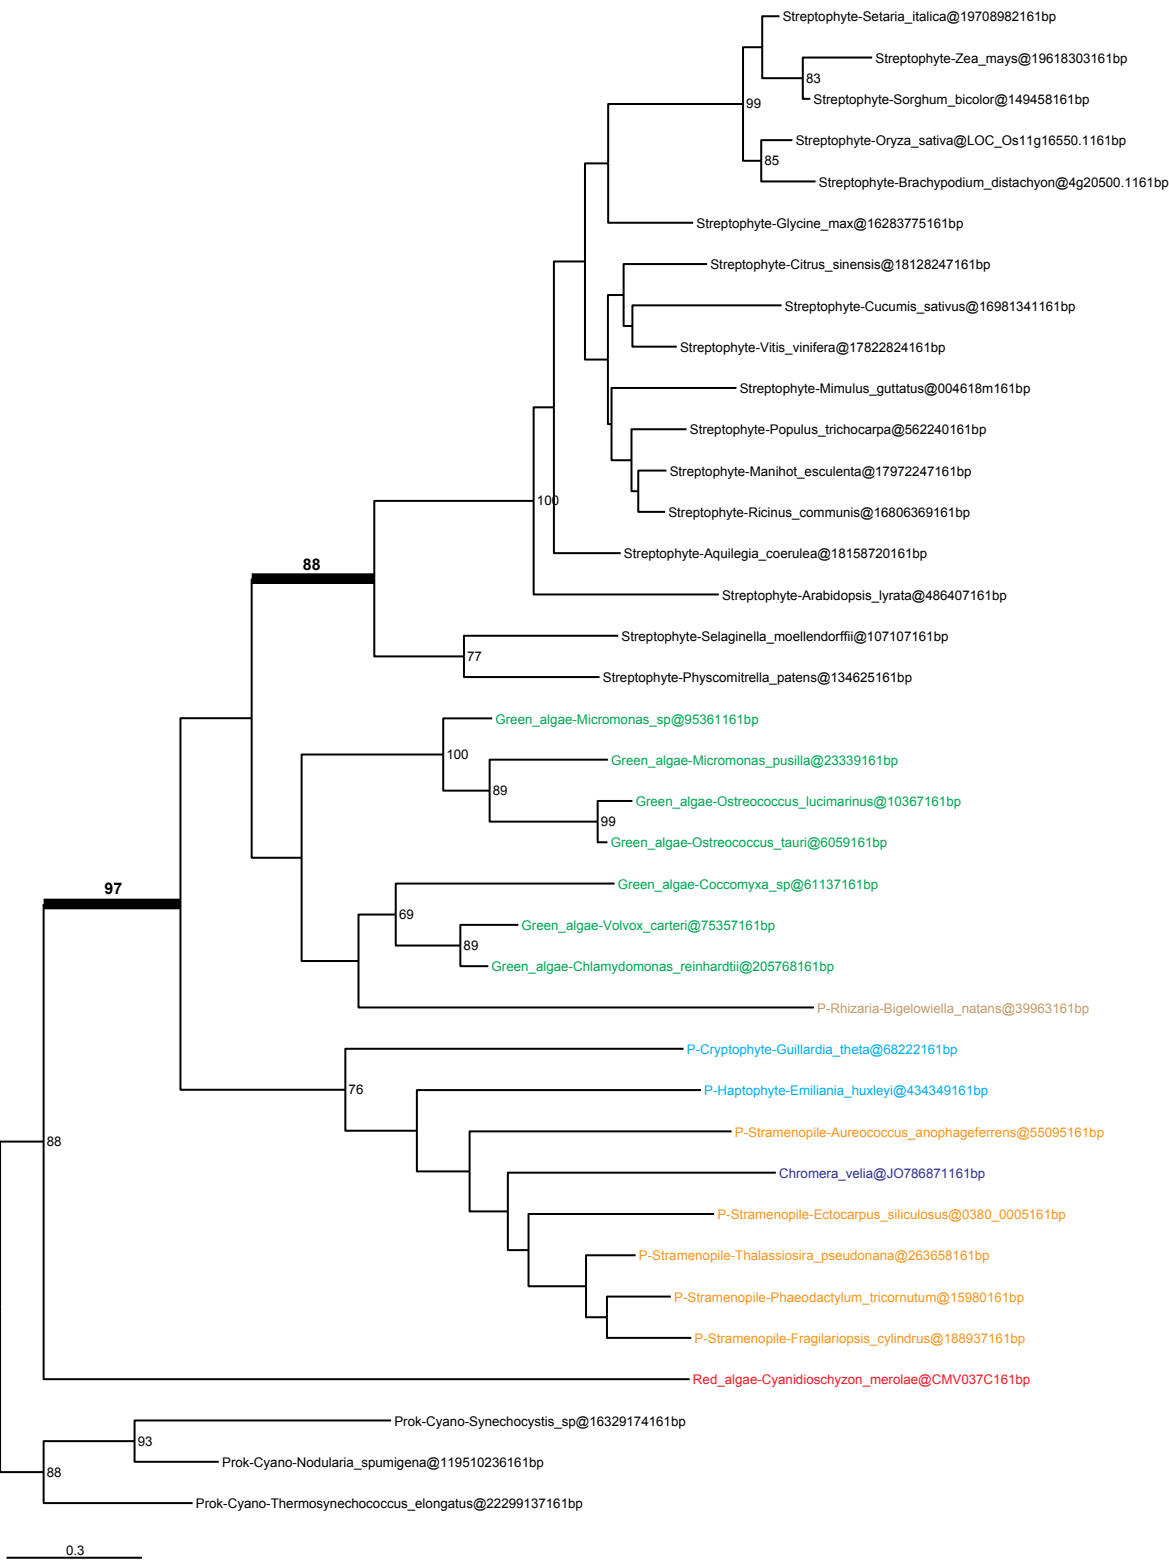

# JO787575: Fructose-bisphosphate aldolase c

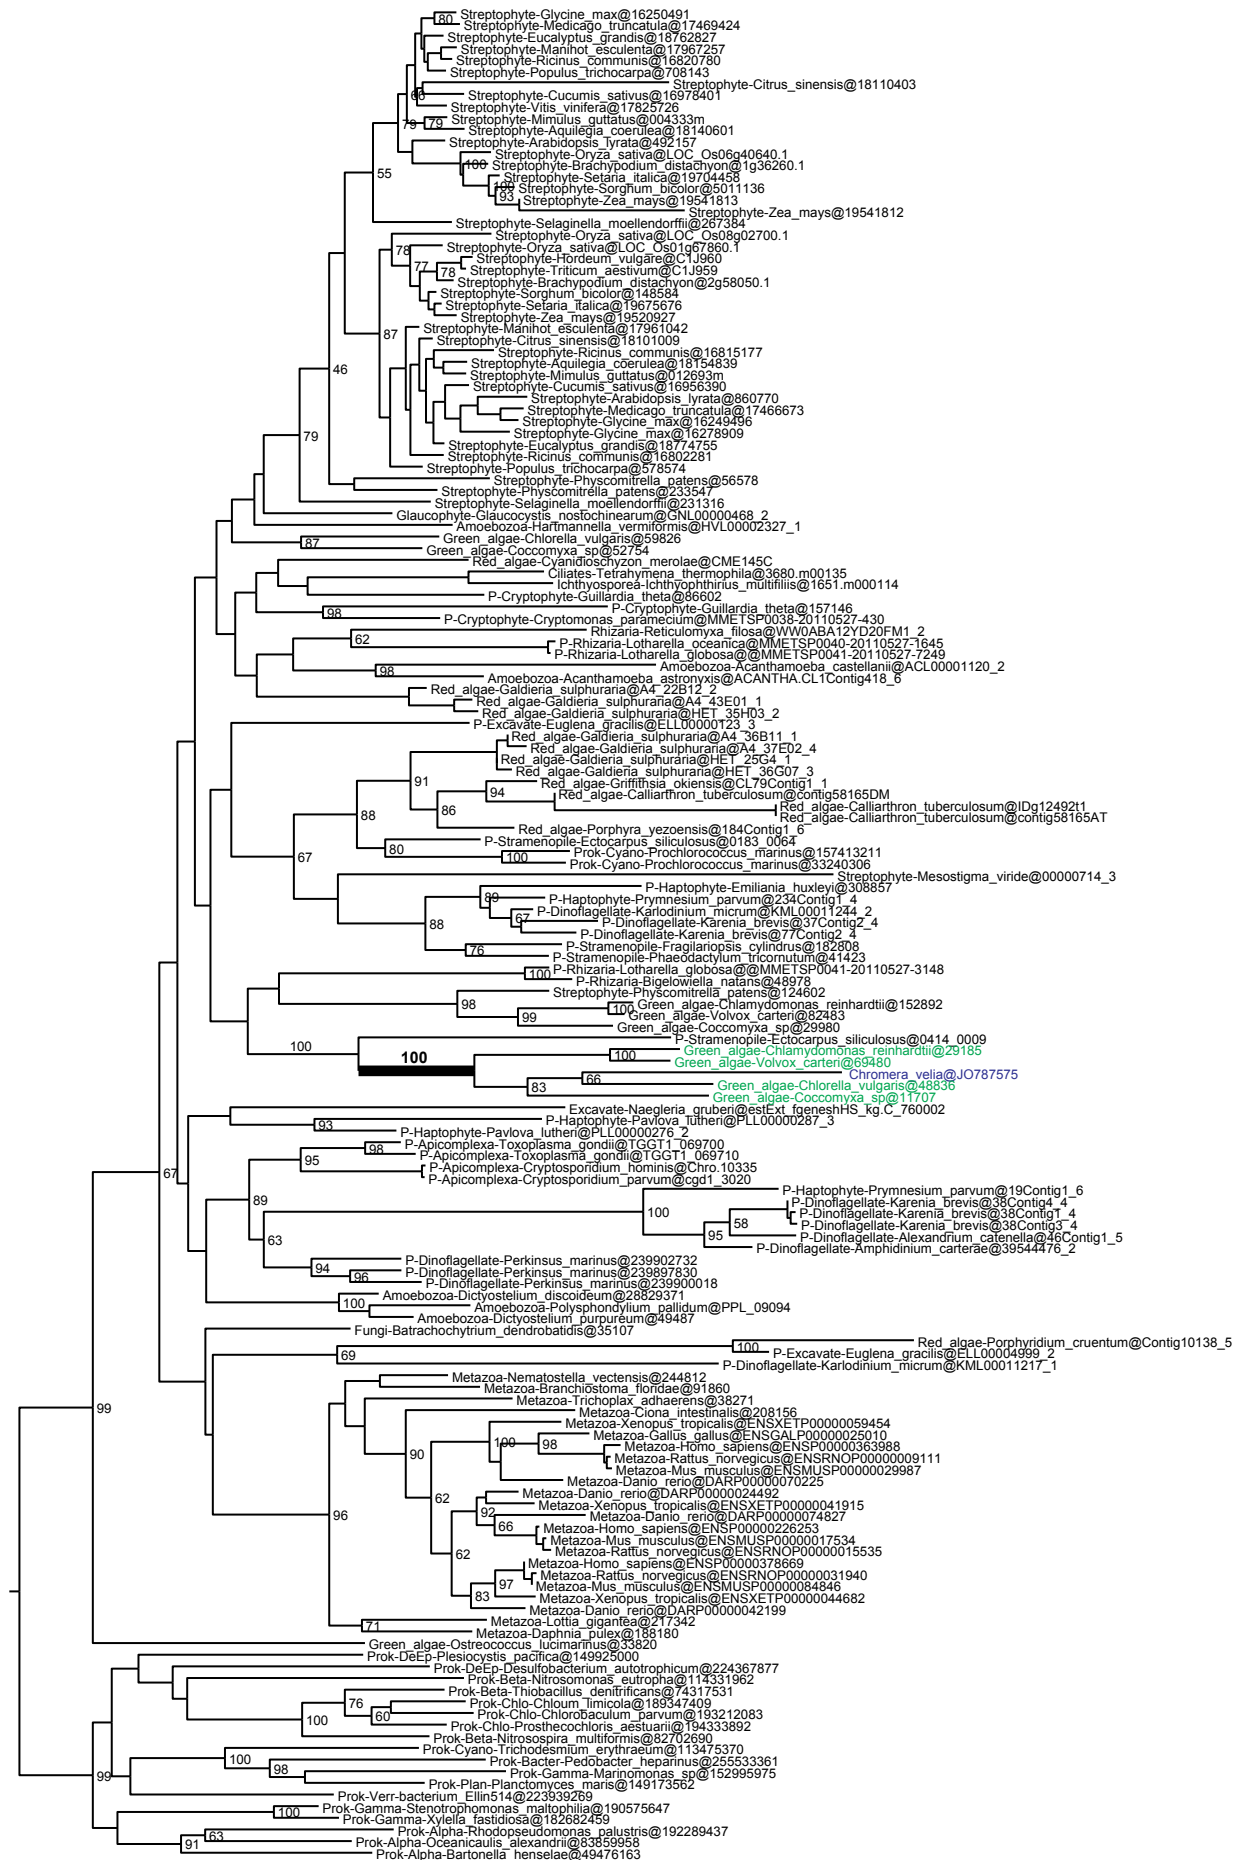

# JO794110: Light-dependent protochlorophyllide oxido-reductase

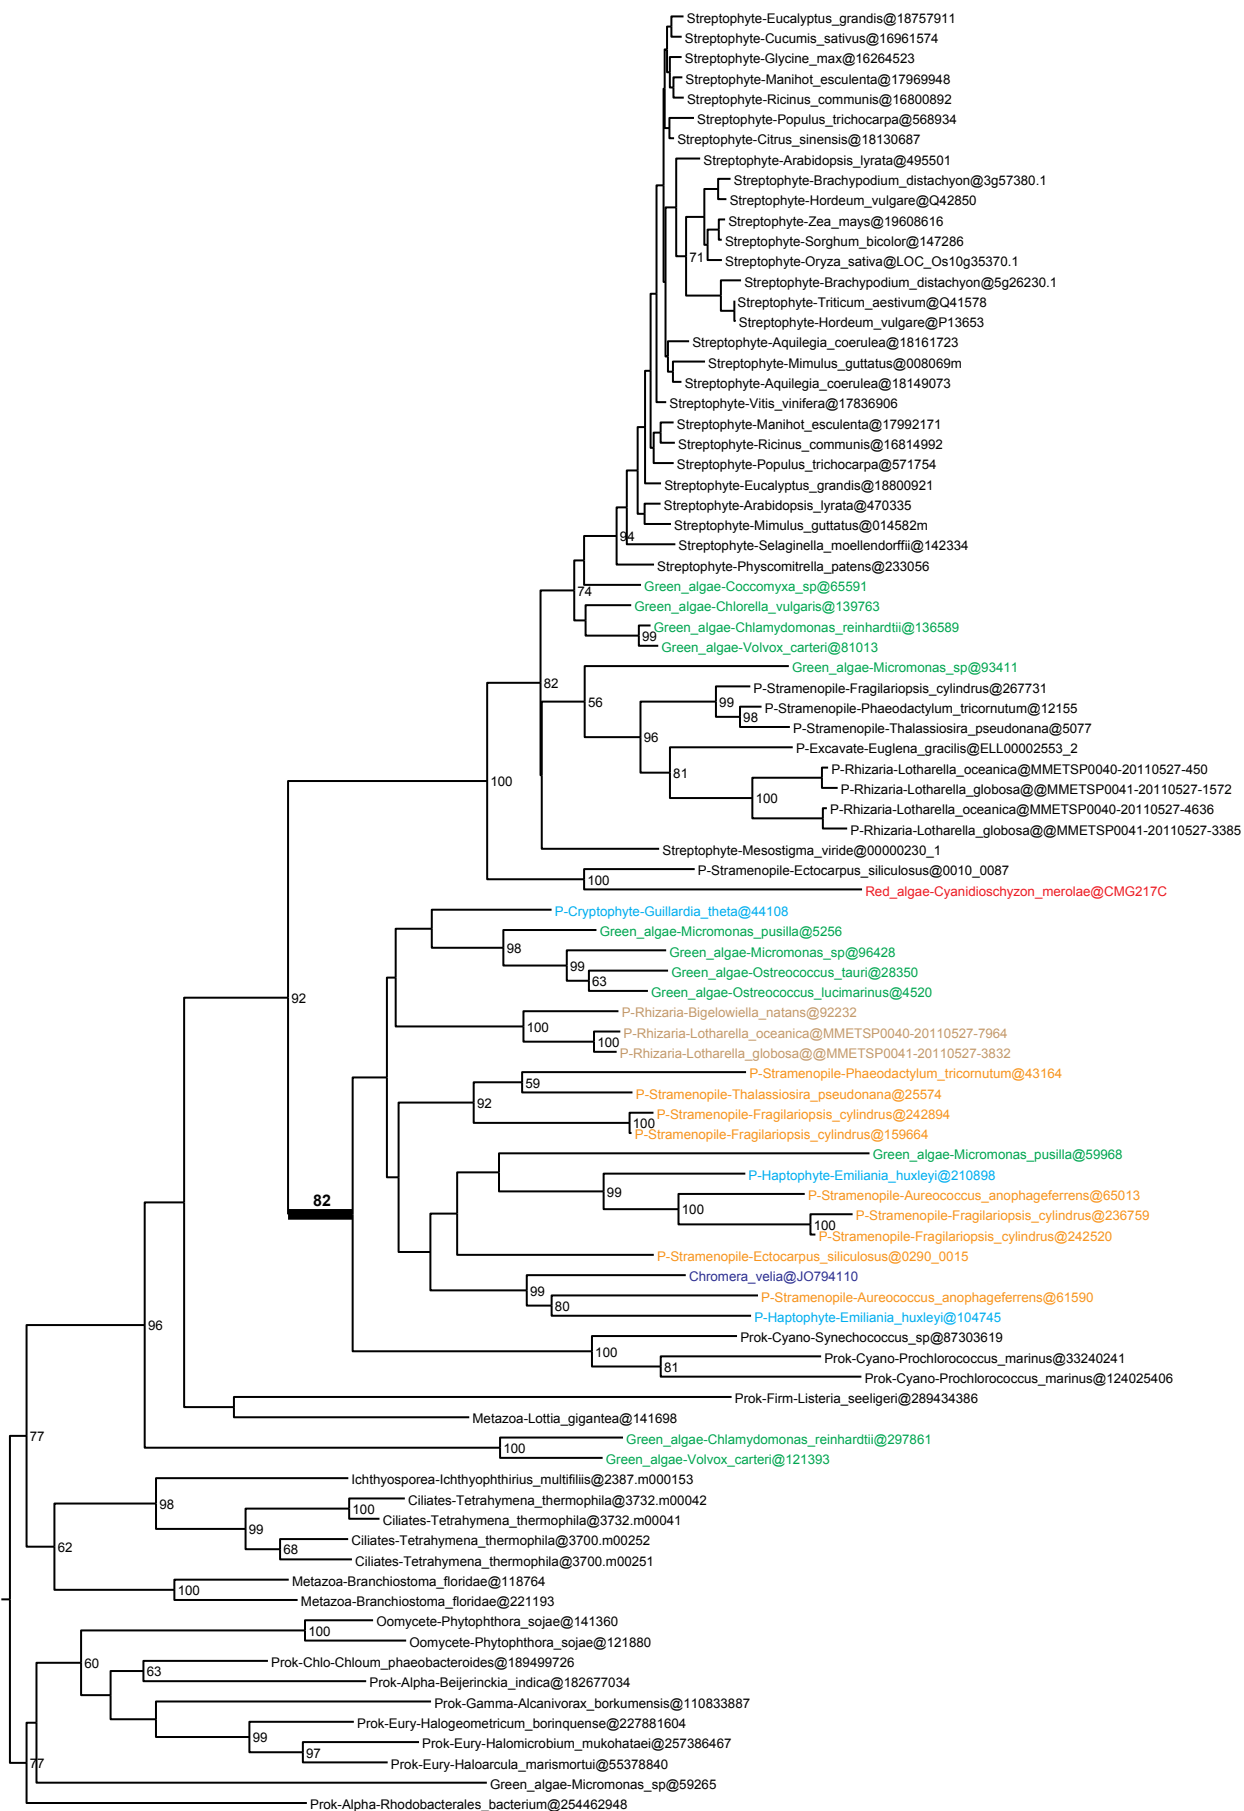

# JO798116: Vacuolar atp synthase 16 kda proteolipid subunit

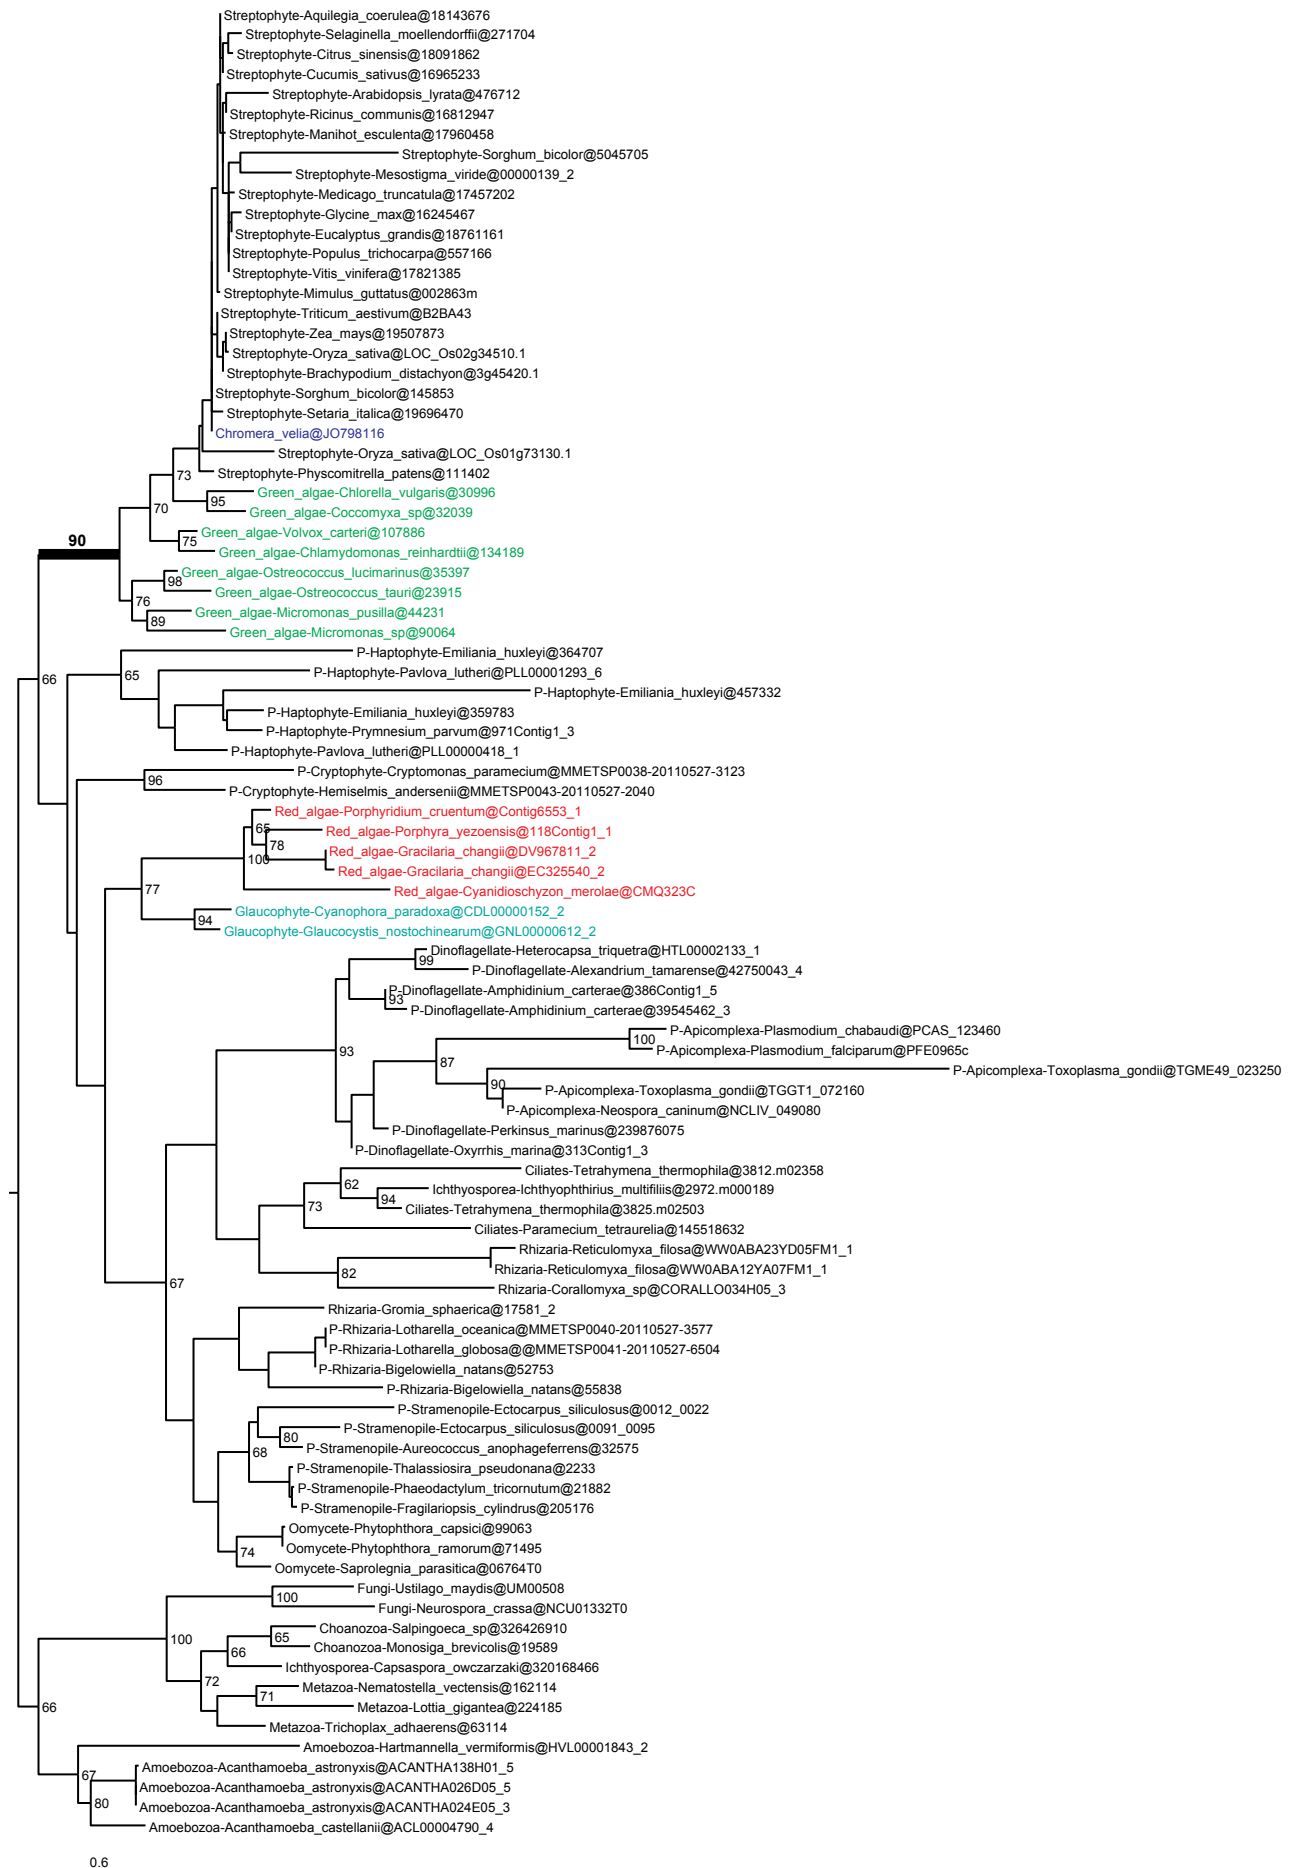

# JO803246: Glucose-methanol-choline oxidoreductase

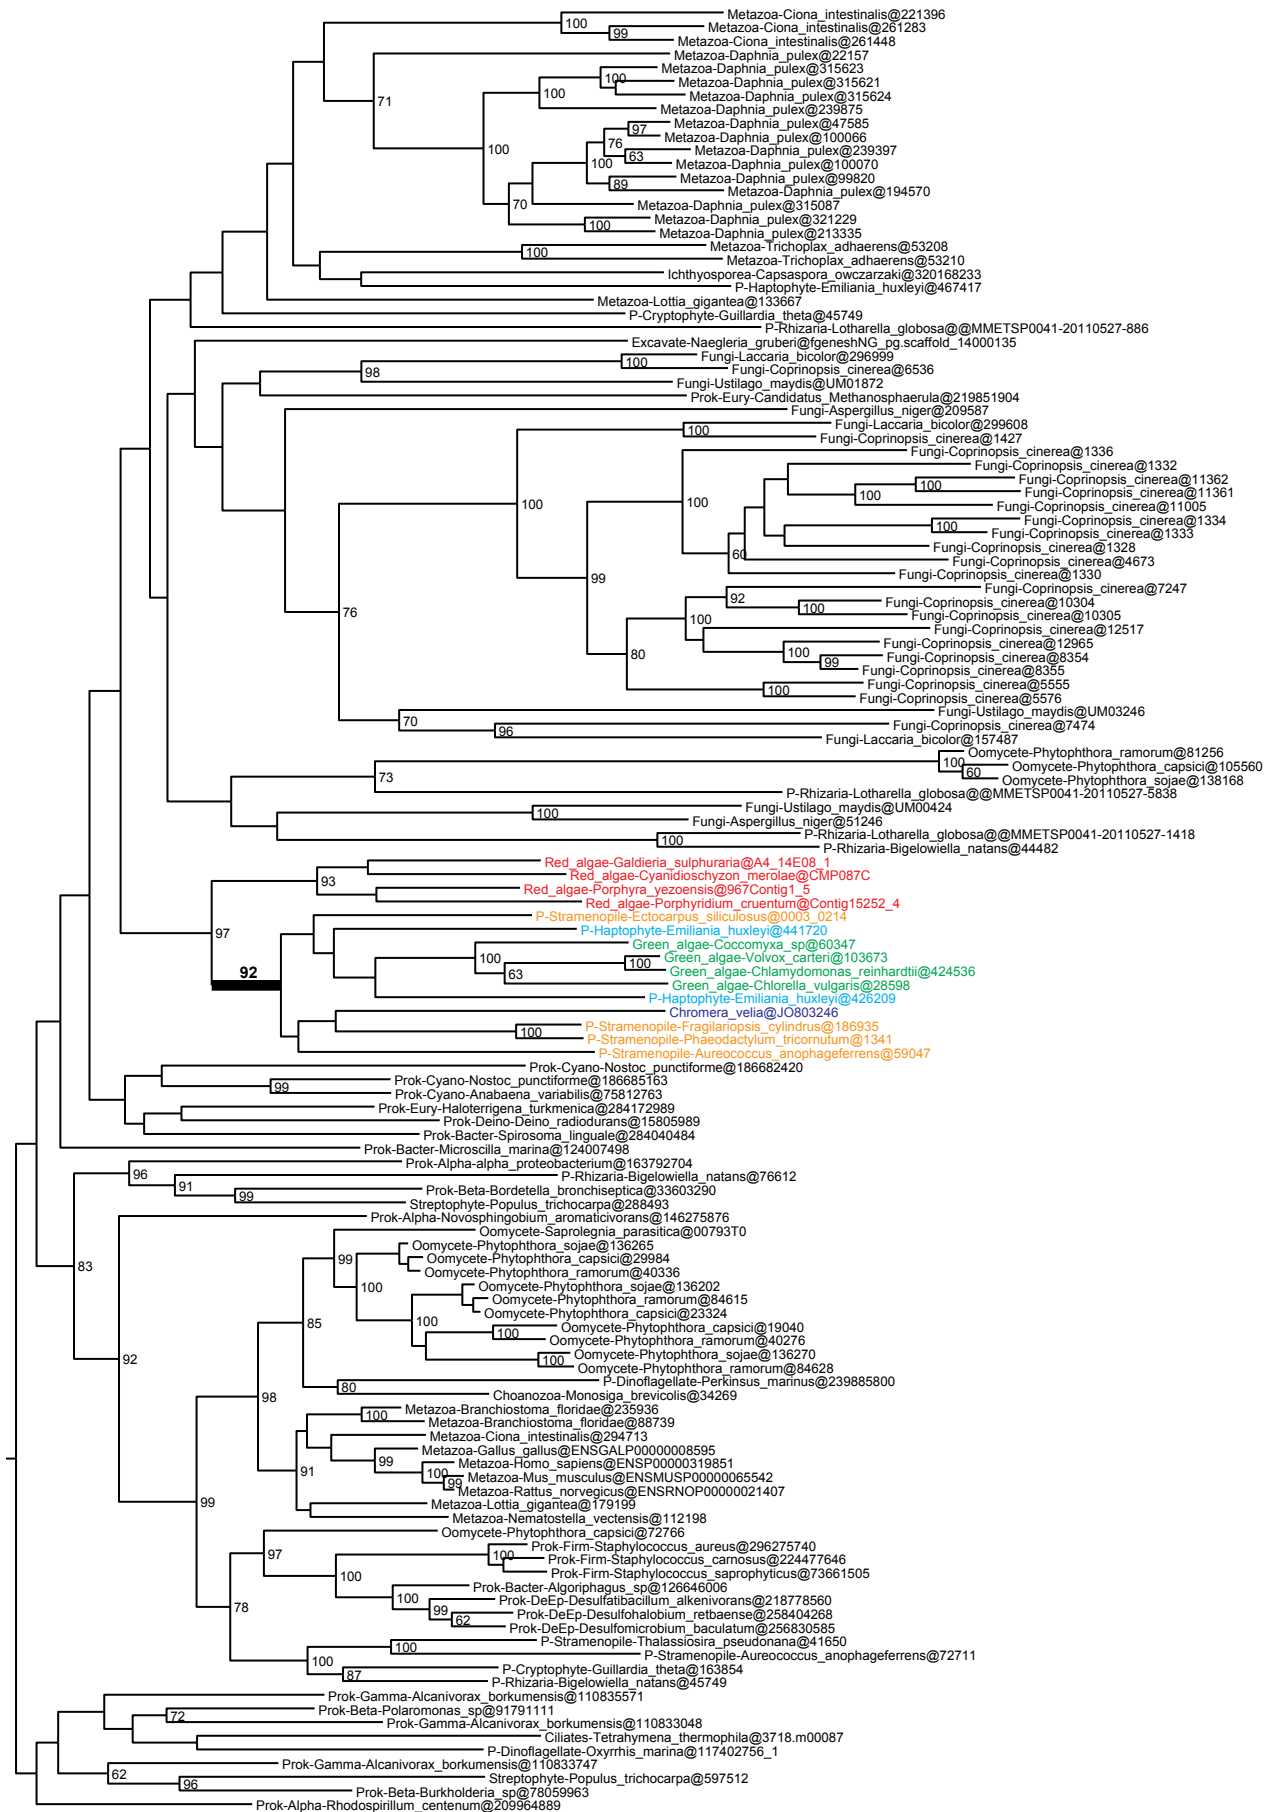

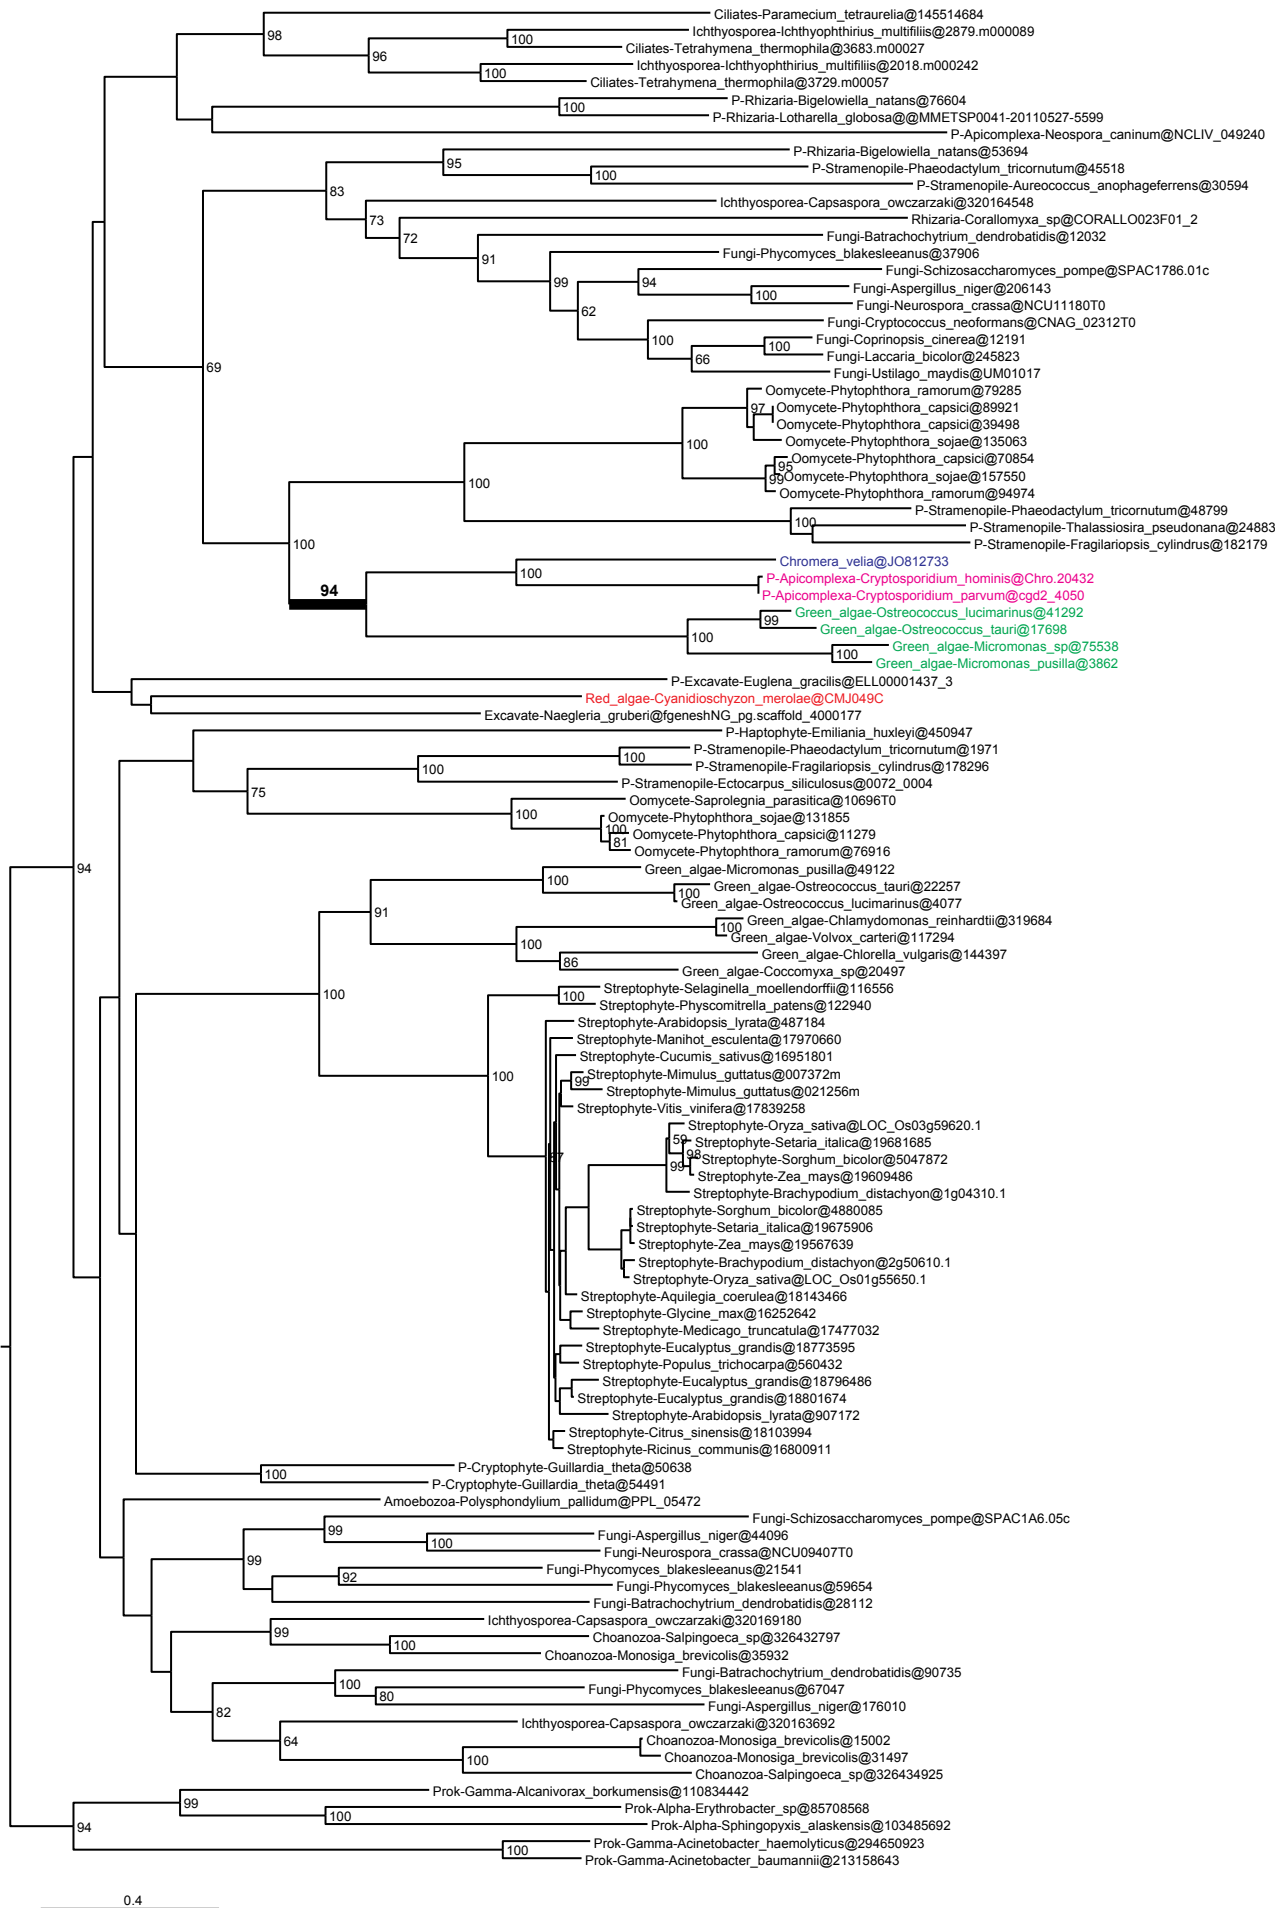

Supplement: evs049_Supplementary_Data.zip [file evs049_Supplementary_Data.zip › FigureS3.pdf]
