# Supplementary material for: Re-evaluating the Green versus Red Signal in Eukaryotes with Secondary Plastid of Red Algal Origin
Source: Oxford University Press journal article supplement (doi:10.1093/gbe/evs049), 2012-01-01
Supplement: evs049_Supplementary_Data.zip [file evs049_Supplementary_Data.zip › TableS1.xls]

## Sheet: IDs.txt
Table S1. Trees supporting monocot contamination in C. velia
In red: the 10 trees inferred in Woehle et al. (2011) to contribute to the green signal
*Coverage is defined here as the length of the C.velia gene fragment divided by the total length of the alignment after masking of the poorly aligned sites (trimal)
C. velia ID	Coverage*	Tree in newick format
JO787228	0.21	(((Streptophyte-Citrus_sinensis@18114361385bp:0.17248015035404154482,((Streptophyte-Populus_trichocarpa@196775385bp:0.18197734697415515748,(Streptophyte-Ricinus_communis@16810783385bp:0.14687398277526661494,Streptophyte-Manihot_esculenta@17992929385bp:0.13616134196579932070)62:0.05046332919265857780)33:0.03141064378203047014,((Streptophyte-Glycine_max@16317073385bp:0.47498544388013674844,Streptop…
JO787236	0.97	((Streptophyte-Brachypodium_distachyon@5g04080.1156bp:0.01687824822293443675,(((((Streptophyte-Zea_mays@19558391156bp:0.00000090688579590175,Streptophyte-Zea_mays@19558392156bp:0.13394161495320788813)100:0.03041419640560584156,Streptophyte-Sorghum_bicolor@148851156bp:0.11321934280609373402)97:0.09060162256208678655,((((Prok-Cyano-Cyanothece_sp@257059483156bp:0.10042237660049552206,(Prok-Cyano-Syn…
JO787794	0.22	(((((Streptophyte-Brachypodium_distachyon@2g31660.1383bp:0.26785186557845058752,(Streptophyte-Oryza_sativa@LOC_Os05g15160.1383bp:0.17185325255691691337,(Streptophyte-Zea_mays@19572252383bp:0.05704452745358529198,(Streptophyte-Setaria_italica@19699070383bp:0.08699672295122527765,Streptophyte-Sorghum_bicolor@5046179383bp:0.04206987866984756436)40:0.01489813623887946241)100:0.13902326105387854960)88…
JO787917	0.64	(Streptophyte-Setaria_italica@19698459265bp:0.02502516822830292559,((Streptophyte-Sorghum_bicolor@4892624265bp:0.05201158572432736799,Streptophyte-Zea_mays@19614053265bp:0.04818799488254143365)96:0.05261955879169383926,((((((Streptophyte-Aquilegia_coerulea@18150845265bp:0.58255491760143485180,((((Streptophyte-Aquilegia_coerulea@18158193265bp:0.74401802105515157937,(((Streptophyte-Arabidopsis_lyra…
JO787926	0.2	(((((Streptophyte-Citrus_sinensis@18125682283bp:0.05019080198529839859,Streptophyte-Cucumis_sativus@16978411283bp:0.07770870443414833184)64:0.02293664528101287473,(Streptophyte-Medicago_truncatula@17446949283bp:0.11723431124733729725,Streptophyte-Glycine_max@16265554283bp:0.06086840893469293995)96:0.06169230884734236420)25:0.00000089285949998227,((Streptophyte-Manihot_esculenta@17990305283bp:0.02…
JO788264	1	(Chromera_velia@JO78826461bp:0.00000108614199865618,(Streptophyte-Triticum_aestivum@P5827361bp:0.00000108614199865618,((Streptophyte-Zea_mays@1963681361bp:0.15735292637094086543,(Streptophyte-Sorghum_bicolor@15010361bp:0.00000108614199865618,Streptophyte-Setaria_italica@1968745461bp:0.00000108614199865618)91:0.00000108614199865618)87:0.06367439831570693987,Streptophyte-Oryza_sativa@LOC_Os02g24642…
JO788759	0.57	((Streptophyte-Glycine_max@16312022217bp:0.11234881786855557828,(Streptophyte-Selaginella_moellendorffii@117112217bp:0.46414355304520210632,(Streptophyte-Physcomitrella_patens@148186217bp:0.37128794177654039776,(Green_algae-Coccomyxa_sp@66039217bp:1.05272581426302358487,((Green_algae-Ostreococcus_tauri@5388217bp:0.06852354574323911429,Green_algae-Ostreococcus_lucimarinus@6822217bp:0.1607957974393…
JO789176	0.74	((Streptophyte-Manihot_esculenta@17982242121bp:0.03994258382078986341,Streptophyte-Ricinus_communis@16817677121bp:0.03379787094945090054)50:0.02346530519999795797,((Streptophyte-Arabidopsis_lyrata@327540121bp:0.09480634661080464265,(Streptophyte-Glycine_max@16259728121bp:0.02387233705248993296,(Streptophyte-Citrus_sinensis@18093340121bp:0.09143411061901336734,Streptophyte-Cucumis_sativus@16963741…
JO789542	0.33	(((Streptophyte-Setaria_italica@19679849491bp:0.02515269991032528449,(Streptophyte-Zea_mays@19594161491bp:0.02215433676371374866,Streptophyte-Sorghum_bicolor@4741106491bp:0.00416446764676298067)98:0.02011558939506845681)88:0.02527208986880707942,((((Green_algae-Volvox_carteri@56272491bp:0.90974627443387390269,(Green_algae-Coccomyxa_sp@29586491bp:0.28472476207880376142,Green_algae-Chlorella_vulgar…
JO789862	0.27	(Streptophyte-Selaginella_moellendorffii@114132393bp:0.33552846674707026420,((((Streptophyte-Vitis_vinifera@17841123393bp:0.10623619874151671305,((((Prok-Gamma-Thioalkalivibrio_sp@220933663393bp:3.06430410703465039290,Streptophyte-Populus_trichocarpa@556843393bp:0.00000091211120171103)86:0.14341666043256648400,((Streptophyte-Manihot_esculenta@17976833393bp:0.07493232379847585001,Streptophyte-Rici…
JO789993	0.14	((((Streptophyte-Setaria_italica@19702382463bp:0.00571244292946165421,(Streptophyte-Zea_mays@19627206463bp:0.01867701222536651343,Streptophyte-Sorghum_bicolor@148453463bp:0.00578937634893082580)89:0.01988544049104670405)49:0.01327582218291017621,((Streptophyte-Arabidopsis_lyrata@329032463bp:0.12334034824571844802,((Streptophyte-Eucalyptus_grandis@18760401463bp:0.08683856180241833478,(Streptophyte…
JO790217	0.26	((((Streptophyte-Zea_mays@19630987269bp:0.07797224952866310677,(Streptophyte-Zea_mays@19579184269bp:0.11907152604122785144,Streptophyte-Sorghum_bicolor@144233269bp:0.03527590985081444086)69:0.03552510149385301741)77:0.09033885875112958319,Streptophyte-Setaria_italica@19690136269bp:0.16348637174142052753)91:0.06223758842924109053,Streptophyte-Sorghum_bicolor@148522269bp:0.50189194985434681939)53:0…
JO790229	0.18	((((Streptophyte-Brachypodium_distachyon@5g10490.1325bp:0.07938530625515272110,((Streptophyte-Setaria_italica@19694627325bp:0.05024935413390108768,Streptophyte-Oryza_sativa@LOC_Os04g35520.1325bp:0.17497717529930439939)48:0.01694839912774856114,(Streptophyte-Sorghum_bicolor@5057218325bp:0.01307406978450252263,Streptophyte-Zea_mays@19552325325bp:0.03002191956241968829)94:0.03280892902456539195)71:0…
JO790255	0.52	(Streptophyte-Sorghum_bicolor@5050988215bp:0.02360897901147020542,(Streptophyte-Setaria_italica@19713181215bp:0.02296709099019101502,(((Streptophyte-Cucumis_sativus@16954066215bp:0.12329334252357236623,((Streptophyte-Populus_trichocarpa@202723215bp:0.11494228154291954991,((Streptophyte-Mimulus_guttatus@011216m215bp:0.23735574979664816886,Streptophyte-Medicago_truncatula@17447803215bp:0.2153757183…
JO790287	0.7	(Chromera_velia@JO790287178bp:0.16755950113224890585,(((Streptophyte-Sorghum_bicolor@147410178bp:0.01093053520095816494,Streptophyte-Zea_mays@19544951178bp:0.00769297512718815704)89:0.04842433391143859817,Streptophyte-Setaria_italica@19682861178bp:0.01658273576581879155)58:0.03380903436046962807,((((((Streptophyte-Manihot_esculenta@17976674178bp:0.05640983950820466913,(Streptophyte-Populus_tricho…
JO790493	0.33	(Streptophyte-Zea_mays@19616785348bp:0.05472785542916681206,((Streptophyte-Setaria_italica@19674965348bp:0.10972483105635626177,Streptophyte-Setaria_italica@19678651348bp:0.05388785341438228488)84:0.00996157537482973351,(((((((Streptophyte-Oryza_sativa@LOC_Os01g02690.1348bp:0.02926638559363580264,Streptophyte-Oryza_sativa@LOC_Os01g02460.1348bp:0.03368204036556928654)100:0.05757687215729739155,Str…
JO791319	0.4	(Chromera_velia@JO791319233bp:0.12204811635437248785,(Streptophyte-Brachypodium_distachyon@2g33320.1233bp:0.13433995594140787921,(((Streptophyte-Sorghum_bicolor@4990933233bp:0.35850471793782778818,(Streptophyte-Setaria_italica@19702149233bp:0.05216176768879896702,((((Streptophyte-Zea_mays@19502605233bp:0.06882572166408407188,Streptophyte-Sorghum_bicolor@146276233bp:0.14186652060594909242)79:0.059…
JO791342	0.35	(((Streptophyte-Physcomitrella_patens@173131382bp:0.16818584345505976918,((Streptophyte-Mesostigma_viride@00000413_2382bp:0.30038418703675490162,(((Green_algae-Volvox_carteri@89593382bp:0.05107811487213143042,Green_algae-Chlamydomonas_reinhardtii@128310382bp:0.08034312257456076301)92:0.08724447366042883956,(Green_algae-Coccomyxa_sp@23324382bp:0.36817152033607114525,Green_algae-Chlorella_vulgaris@…
JO791621	0.92	(((Streptophyte-Populus_trichocarpa@725698168bp:0.13370918663533998272,(((Streptophyte-Sorghum_bicolor@144097168bp:0.08191336852927828815,(Streptophyte-Zea_mays@19634646168bp:0.22469238205398062158,(Streptophyte-Zea_mays@19634648168bp:0.00000086873084040106,(Streptophyte-Zea_mays@19632101168bp:0.00607667714992467592,Streptophyte-Zea_mays@19634650168bp:0.29960204418513092239)12:0.00054162438318242…
JO791906	0.3	((Streptophyte-Setaria_italica@19678001333bp:0.01525808294741399368,(Streptophyte-Sorghum_bicolor@148140333bp:0.00607791030702730870,Streptophyte-Zea_mays@19576517333bp:0.00910306158164485811)62:0.00000094569879759698)92:0.01284933372618945503,(((Streptophyte-Selaginella_moellendorffii@160113333bp:0.08690235982405329629,((Streptophyte-Physcomitrella_patens@185348333bp:0.10515968474068418392,Strep…
JO792271	0.37	(Streptophyte-Aquilegia_coerulea@18144579293bp:0.23938698817542838904,((((Streptophyte-Glycine_max@16249218293bp:0.27764746180158000888,Streptophyte-Citrus_sinensis@18118237293bp:0.20959224466208903337)65:0.10493940515623241538,((Streptophyte-Ricinus_communis@16801324293bp:0.15111235142181531077,Streptophyte-Manihot_esculenta@17992261293bp:0.09038087383817582088)81:0.03934053023887272571,(Strepto…
JO792435	0.35	(Streptophyte-Cucumis_sativus@16955671296bp:0.00000092918324607705,((((Streptophyte-Aquilegia_coerulea@18155398296bp:0.23289290775844165293,Streptophyte-Aquilegia_coerulea@18147942296bp:0.11334075617659447599)100:0.74030359403913381655,(Streptophyte-Aquilegia_coerulea@18163756296bp:0.09086654903279445250,Streptophyte-Aquilegia_coerulea@18147907296bp:0.00000092918324607705)98:0.0000009291832460770…
JO792674	0.28	(((Streptophyte-Arabidopsis_lyrata@327146320bp:0.27005896850425015199,Streptophyte-Populus_trichocarpa@249723320bp:0.13915545513281429857)22:0.03755262081872227931,Streptophyte-Citrus_sinensis@18091944320bp:0.62770999011235095733)6:0.02112295940271444530,((Streptophyte-Aquilegia_coerulea@18142994320bp:0.08035284690563679333,Streptophyte-Vitis_vinifera@17831812320bp:0.04763077867471732230)20:0.012…
JO793175	0.22	(((Streptophyte-Sorghum_bicolor@4869539679bp:0.03012305698656047095,Streptophyte-Zea_mays@19593692679bp:0.02331698773241947312)65:0.00835660151280543002,Streptophyte-Setaria_italica@19680329679bp:0.03187423518214237833)99:0.04310565163472032668,((((Streptophyte-Oryza_sativa@LOC_Os10g28030.1679bp:0.06695710267063383070,Streptophyte-Brachypodium_distachyon@3g26790.1679bp:0.11738087898249022212)91:0…
JO793331	0.34	(((((Streptophyte-Mimulus_guttatus@012391m231bp:0.23902056067102750436,((Streptophyte-Glycine_max@16271373231bp:0.24970949329981029230,Streptophyte-Arabidopsis_lyrata@488165231bp:0.51063907658265128564)94:0.14868011782810694466,(Streptophyte-Populus_trichocarpa@814100231bp:0.36733774723453421762,(Streptophyte-Ricinus_communis@16802471231bp:0.07567327611805653442,Streptophyte-Manihot_esculenta@179…
JO794051	0.54	(((Streptophyte-Sorghum_bicolor@149739263bp:0.05753145178960532291,Streptophyte-Setaria_italica@19702038263bp:0.01585905714814431558)97:0.06008503995562870792,Streptophyte-Brachypodium_distachyon@2g23480.1263bp:0.02984592897346579482)60:0.01742795190054020199,((Streptophyte-Aquilegia_coerulea@18147135263bp:0.19814095674994119944,(Streptophyte-Vitis_vinifera@17826888263bp:0.16973638676612329279,((…
JO794401	0.84	(Chromera_velia@JO794401142bp:0.00000096825162432470,(Streptophyte-Glycine_max@16297055142bp:0.10595853357458903665,((((Streptophyte-Arabidopsis_lyrata@891585142bp:0.04408751920610409769,Streptophyte-Zea_mays@19522506142bp:0.00724314277515660399)14:0.00000096825162432470,((Streptophyte-Oryza_sativa@LOC_Os12g10560.1142bp:0.00000096825162432470,Streptophyte-Setaria_italica@19702387142bp:0.007228562…
JO794673	0.3	((Streptophyte-Selaginella_moellendorffii@77840364bp:0.81417254208566802731,(((Streptophyte-Citrus_sinensis@18102401364bp:0.15107537231209719475,((Streptophyte-Medicago_truncatula@17455786364bp:0.12950815045725594388,Streptophyte-Glycine_max@16277380364bp:0.08298752109411884625)98:0.10694941462065749027,(Streptophyte-Vitis_vinifera@17838156364bp:0.07758039393148949414,(((Streptophyte-Aquilegia_co…
JO794804	0.56	(Streptophyte-Brachypodium_distachyon@3g43140.1217bp:0.00000086045902994337,(Chromera_velia@JO794804217bp:0.12483455206079724364,(Streptophyte-Oryza_sativa@LOC_Os02g26700.1217bp:0.04854659726315064400,((((Streptophyte-Physcomitrella_patens@125867217bp:0.16878184161537707064,(Streptophyte-Physcomitrella_patens@198320217bp:0.11913157753270596506,Streptophyte-Physcomitrella_patens@124114217bp:0.1201…
JO795595	0.66	(Chromera_velia@JO795595203bp:0.50087410987948211005,(((((Streptophyte-Selaginella_moellendorffii@425480203bp:0.13812853010958067723,Streptophyte-Selaginella_moellendorffii@406519203bp:0.15367829556910356237)100:0.72588819170008378467,Streptophyte-Physcomitrella_patens@172311203bp:0.32611850919989954223)65:0.22128498640733684777,(((Streptophyte-Cucumis_sativus@16971516203bp:0.09539234645861771611…
JO795941	0.31	((Streptophyte-Setaria_italica@19713480190bp:0.10083402862212773043,(Streptophyte-Zea_mays@19562931190bp:0.34194741872623818368,(Streptophyte-Zea_mays@19537904190bp:0.02472221488310127196,Streptophyte-Sorghum_bicolor@5000454190bp:0.03465509231772802984)40:0.02448437663634008346)49:0.03138565084823864704)97:0.08884553773901762708,(Chromera_velia@JO795941190bp:0.04693839111056952867,Streptophyte-Br…
JO797054	0.16	(Chromera_velia@JO797054814bp:0.10803583229146840328,(Streptophyte-Brachypodium_distachyon@2g45070.1814bp:0.01367137786586952383,(((Streptophyte-Setaria_italica@19677096814bp:0.00714205452989072256,(Streptophyte-Sorghum_bicolor@4780116814bp:0.00000093439754636774,(Streptophyte-Zea_mays@19536846814bp:0.55819887434012827043,Streptophyte-Zea_mays@19576906814bp:0.00311791473959635492)45:0.00308288412…
JO797805	0.11	((((Streptophyte-Physcomitrella_patens@1734791164bp:0.15460109320634013441,(Streptophyte-Selaginella_moellendorffii@1369831164bp:0.14151950587366857182,((((P-Dinoflagellate-Perkinsus_marinus@2398783151164bp:0.67981970975976946381,(((P-Stramenopile-Thalassiosira_pseudonana@215381164bp:0.20245591460511938586,(P-Stramenopile-Phaeodactylum_tricornutum@422761164bp:0.18838403530570371758,P-Stramenopile…
JO797967	0.4	(Chromera_velia@JO797967367bp:0.00722413014634729154,(((((Streptophyte-Oryza_sativa@LOC_Os01g17170.1367bp:0.00000090272944677492,Streptophyte-Oryza_sativa@LOC_Os01g17170.2367bp:0.06080887277145124309)100:0.01878613977476147751,((Streptophyte-Sorghum_bicolor@5052968367bp:0.00798476462482326788,Streptophyte-Zea_mays@19567454367bp:0.01574981801928451025)42:0.00424958431060890301,Streptophyte-Setaria…
JO797973	0.46	(Streptophyte-Glycine_max@16245959204bp:0.03397305845599620649,((Streptophyte-Ricinus_communis@16817782204bp:0.03208580222909378915,(Streptophyte-Eucalyptus_grandis@18767195204bp:0.03155394363318450579,(Streptophyte-Populus_trichocarpa@646125204bp:0.01520053575689641126,(Streptophyte-Citrus_sinensis@18094448204bp:0.01531197619357180760,(((Streptophyte-Mimulus_guttatus@006211m204bp:0.0518959428735…
JO798026	1	((((Streptophyte-Arabidopsis_lyrata@87637062bp:0.01512051163181231221,Streptophyte-Medicago_truncatula@1748080262bp:0.01817459621963582808)80:0.01883713526209677622,Streptophyte-Eucalyptus_grandis@1878089562bp:0.19944437877800988423)52:0.01505805961057433105,Streptophyte-Glycine_max@1624397062bp:0.07440014980336179251)94:0.07308841261370802034,((Streptophyte-Zea_mays@1963393862bp:0.01182301039654…
JO798033	0.51	(Streptophyte-Brachypodium_distachyon@2g26050.1239bp:0.12646420769434482678,((((Streptophyte-Mimulus_guttatus@016034m239bp:0.74065921298339076895,(Streptophyte-Physcomitrella_patens@126140239bp:0.91559478352481993291,(Streptophyte-Selaginella_moellendorffii@266933239bp:0.49030782763544483727,Streptophyte-Selaginella_moellendorffii@173745239bp:0.43873637949654437085)96:0.24134458570731881499)47:0.…
JO798044	0.7	(((((Streptophyte-Selaginella_moellendorffii@159064157bp:0.73394440186341480814,(Streptophyte-Physcomitrella_patens@167917157bp:0.01373388187515970672,Streptophyte-Physcomitrella_patens@223014157bp:0.23578374618563602283)100:0.48216750168299576940)63:0.12317459834785213224,(Streptophyte-Mesostigma_viride@00001009_3157bp:0.77930386469796231186,(((Green_algae-Ostreococcus_tauri@34969157bp:0.0974749…
JO798307	0.53	(((Streptophyte-Glycine_max@16306213212bp:0.07137655884910178161,((Streptophyte-Arabidopsis_lyrata@496906212bp:0.15196715619706602229,Streptophyte-Manihot_esculenta@17992662212bp:0.04091307856823230699)83:0.04916586443778063475,Streptophyte-Cucumis_sativus@16958831212bp:0.14840773783835869981)51:0.02804975722669889038)39:0.02599795681465767380,Streptophyte-Aquilegia_coerulea@18155973212bp:0.07908…
JO798316	0.64	(((Streptophyte-Arabidopsis_lyrata@484699160bp:0.19970054189525798805,(Streptophyte-Citrus_sinensis@18135272160bp:0.18269767645180148841,((Streptophyte-Populus_trichocarpa@736423160bp:0.10601934800976896278,(Streptophyte-Manihot_esculenta@17983540160bp:0.08471959725519459528,Streptophyte-Ricinus_communis@16804028160bp:0.02318269118338758469)77:0.07033684454726875368)55:0.07135341416529335234,(Str…
JO798498	0.31	((((Streptophyte-Vitis_vinifera@17828721190bp:0.22100479475998835444,(Streptophyte-Ricinus_communis@16804256190bp:0.07749832814412251081,Streptophyte-Manihot_esculenta@17966433190bp:0.06992496543473684933)94:0.08411627499404815411)70:0.06947038507266849183,((Streptophyte-Vitis_vinifera@17822093190bp:0.06965027933260668769,Streptophyte-Manihot_esculenta@17960386190bp:0.11671061251447187312)20:0.00…
JO798591	0.15	((Streptophyte-Sorghum_bicolor@4895953533bp:0.01283950220308244239,Streptophyte-Zea_mays@19502123533bp:0.03809943546399740394)72:0.01414181808588197212,(Chromera_velia@JO798591533bp:0.08052046666128008512,(Streptophyte-Brachypodium_distachyon@2g15300.1533bp:0.04656463310402041839,(Streptophyte-Oryza_sativa@LOC_Os05g50510.1533bp:0.05561952208392086094,((Streptophyte-Aquilegia_coerulea@18161378533b…
JO798806	0.62	(Streptophyte-Brachypodium_distachyon@3g19690.1232bp:0.05581020584113863259,((Streptophyte-Setaria_italica@19696673232bp:0.01228721306305912211,(Streptophyte-Sorghum_bicolor@5007016232bp:0.00417496855577016279,Streptophyte-Zea_mays@19579769232bp:0.01333709026732748937)97:0.00914061001895297327)47:0.00886641659817261063,(Streptophyte-Oryza_sativa@LOC_Os02g02720.3232bp:0.06942492411338881120,(((Str…
JO799329	0.36	((Streptophyte-Setaria_italica@19687599192bp:0.02032608069074003099,(Streptophyte-Sorghum_bicolor@5055879192bp:0.00821041271250160139,(Streptophyte-Zea_mays@19635453192bp:0.03471874389233937236,(((Streptophyte-Cucumis_sativus@16977477192bp:0.32086629434663282989,Streptophyte-Vitis_vinifera@17818010192bp:0.11260504839173196556)30:0.04477432580807834406,(Streptophyte-Medicago_truncatula@17462002192…
JO799542	0.25	(((Streptophyte-Oryza_sativa@LOC_Os11g47970.1411bp:0.06443986703873823274,(((Streptophyte-Setaria_italica@19708291411bp:0.07014733815181158072,(Streptophyte-Sorghum_bicolor@4818863411bp:0.04689541082838943192,Streptophyte-Zea_mays@19589392411bp:0.02422683587301453431)94:0.06036011388842179443)83:0.02383013438498487666,(((Streptophyte-Setaria_italica@19708029411bp:0.37607376692221061720,Streptophy…
JO799819	0.42	(Chromera_velia@JO799819226bp:0.23931220336723113551,(Streptophyte-Oryza_sativa@LOC_Os10g41940.1226bp:0.08198745522742159619,(((Streptophyte-Ricinus_communis@16816793226bp:0.12810377661493171919,((((Streptophyte-Citrus_sinensis@18122606226bp:0.21248719077492655982,Streptophyte-Populus_trichocarpa@197007226bp:0.12783140197551193240)55:0.03633880861110502791,Streptophyte-Glycine_max@16277463226bp:0…
JO800006	0.58	(Chromera_velia@JO800006201bp:0.20074021029843758246,(Streptophyte-Oryza_sativa@LOC_Os06g19690.1201bp:0.17606543736636626196,((Streptophyte-Setaria_italica@19703369201bp:0.03675107279453013881,(Streptophyte-Sorghum_bicolor@5050625201bp:0.03292702865909166721,(Streptophyte-Zea_mays@19537648201bp:0.00000093849414733662,Streptophyte-Zea_mays@19540752201bp:0.31872882938551277965)87:0.0526741601189099…
JO800036	0.25	(Streptophyte-Arabidopsis_lyrata@490821462bp:0.05453457519605331427,((Streptophyte-Mimulus_guttatus@008815m462bp:0.04460752105210111923,((Streptophyte-Aquilegia_coerulea@18155528462bp:0.05396580458803109520,(Streptophyte-Mimulus_guttatus@024919m462bp:0.05107868407314264392,(Streptophyte-Arabidopsis_lyrata@489509462bp:0.07029543427349013718,((Streptophyte-Glycine_max@16249426462bp:0.02628905979423…
JO800648	0.56	(((((Streptophyte-Populus_trichocarpa@817312135bp:0.16417641324896992128,(Streptophyte-Cucumis_sativus@16977341135bp:0.24468782367062216765,Streptophyte-Vitis_vinifera@17829472135bp:0.06939958146682244366)45:0.05441621532990374016)33:0.04749388537325515552,(Streptophyte-Cucumis_sativus@16975746135bp:0.28604528428916925487,Streptophyte-Citrus_sinensis@18120329135bp:0.04675659276229217343)35:0.0154…
JO800899	0.27	(Streptophyte-Triticum_aestivum@C7DPL0350bp:0.00267344730664957272,(Chromera_velia@JO800899350bp:0.01096682916976517499,((((Streptophyte-Sorghum_bicolor@4762647350bp:0.00548049297249120649,Streptophyte-Zea_mays@19616380350bp:0.01480346593646646169)100:0.02964937211553616767,(Streptophyte-Setaria_italica@19699747350bp:0.01975991263419894436,(((Streptophyte-Populus_trichocarpa@725763350bp:0.0378201…
JO800939	0.17	(Streptophyte-Setaria_italica@19692203609bp:0.23087172803085137529,(((Streptophyte-Zea_mays@19597541609bp:0.06492835753772953356,Streptophyte-Sorghum_bicolor@5008099609bp:0.04694447370674893066)97:0.11635984605368278333,((Streptophyte-Oryza_sativa@LOC_Os09g32840.1609bp:0.18545451451723282688,(Streptophyte-Setaria_italica@19695343609bp:0.05937173197700332944,(Streptophyte-Zea_mays@19552582609bp:0.…
JO801112	0.53	((Streptophyte-Vitis_vinifera@17830999202bp:0.06352296124683706746,((((Streptophyte-Arabidopsis_lyrata@490898202bp:0.27505638443900254364,Streptophyte-Eucalyptus_grandis@18808623202bp:0.23633651343872522088)9:0.01832539100554088363,((Streptophyte-Citrus_sinensis@18125302202bp:0.13338718782508657279,Streptophyte-Cucumis_sativus@16968725202bp:0.22270635945110614506)27:0.01210163749041021433,(Strept…
JO801191	0.14	(((Streptophyte-Ricinus_communis@16810657734bp:0.07757870170841031643,Streptophyte-Manihot_esculenta@17986627734bp:0.11234043602906183812)100:0.04873895042714359443,Streptophyte-Populus_trichocarpa@568163734bp:0.11397434473599457605)79:0.03381637625521972251,(((Streptophyte-Cucumis_sativus@16978323734bp:0.22842856630026034392,Streptophyte-Arabidopsis_lyrata@475104734bp:0.37852617050501558005)18:0…
JO801266	0.25	(Chromera_velia@JO801266437bp:0.11220270388703601494,(((Streptophyte-Mimulus_guttatus@002674m437bp:0.22329790906642041359,(((Streptophyte-Physcomitrella_patens@164933437bp:0.61619641799515312286,Streptophyte-Selaginella_moellendorffii@146571437bp:0.71974636289364601893)100:0.39523611088335414143,Streptophyte-Arabidopsis_lyrata@486131437bp:0.19879934400538795680)43:0.05200636989798774340,((((Strep…
JO801325	0.36	((Streptophyte-Setaria_italica@19701238283bp:0.01092552826418844748,((Streptophyte-Setaria_italica@19677358283bp:0.18287462185171030060,(Streptophyte-Sorghum_bicolor@5028902283bp:0.06479535450142116793,Streptophyte-Zea_mays@19619452283bp:0.06930926317711783025)96:0.05341691046825938066)60:0.02075674797360647569,((Streptophyte-Citrus_sinensis@18091110283bp:0.58234180263593082749,Streptophyte-Brach…
JO801380	0.26	(Streptophyte-Arabidopsis_lyrata@894873471bp:0.08884989355042315073,((Streptophyte-Glycine_max@16243245471bp:0.05378977055412998559,Streptophyte-Medicago_truncatula@17464043471bp:0.07968227808399719336)100:0.05418156148884139406,((((Streptophyte-Cucumis_sativus@16975009471bp:0.07558222696546364194,Streptophyte-Manihot_esculenta@17963346471bp:0.03423956997219439191)24:0.01248109923403892783,(Strep…
JO801641	0.46	(Chromera_velia@JO801641203bp:0.00000088040576377415,(Streptophyte-Brachypodium_distachyon@2g44860.1203bp:0.00000088040576377415,((((((Streptophyte-Brachypodium_distachyon@2g44870.1203bp:0.24107935591470605607,(Streptophyte-Sorghum_bicolor@4801658203bp:0.10802899121922429626,Streptophyte-Setaria_italica@19677520203bp:0.11648582829484485646)97:0.16568897513873551142)100:0.24413344453625135388,((((…
JO802052	0.29	((((Streptophyte-Sorghum_bicolor@5059769226bp:0.06761745823460538207,Streptophyte-Zea_mays@19519597226bp:0.08081545832141646957)47:0.03097224283215729151,Streptophyte-Setaria_italica@19702153226bp:0.02895378727152990786)45:0.02522438902292080051,Streptophyte-Setaria_italica@19685043226bp:0.32326414909709955126)51:0.03522619030510197591,((((((Streptophyte-Ricinus_communis@16812080226bp:0.196929606…
JO802361	0.45	((Streptophyte-Sorghum_bicolor@5052848318bp:0.00951853668185746564,(Streptophyte-Setaria_italica@19674928318bp:0.01652631349914569434,Streptophyte-Zea_mays@19569325318bp:0.00952434962828264259)48:0.00581778525184209819)89:0.02905846878555969071,((Streptophyte-Cucumis_sativus@16955780318bp:0.14636385995442932617,((Streptophyte-Manihot_esculenta@17979995318bp:0.19800280408888096262,((Streptophyte-M…
JO802451	0.22	(((((((((((((P-Apicomplexa-Neospora_caninum@NCLIV_050470453bp:0.74663032865318690323,((Red_algae-Calliarthron_tuberculosum@contig77172HS453bp:0.00000096715748149899,Red_algae-Calliarthron_tuberculosum@IDg17133t1453bp:0.00000096715748149899)100:0.53532180793894268422,Red_algae-Cyanidioschyzon_merolae@CMM104C453bp:0.41601439266250628268)73:0.13447536414201738397)50:0.09959501194521266920,Glaucophyt…
JO802466	0.44	((((Streptophyte-Aquilegia_coerulea@18151839227bp:0.18940797795269506687,(((Streptophyte-Glycine_max@16272286227bp:0.43830602669911727931,(Streptophyte-Mimulus_guttatus@022261m227bp:0.39616754665704145832,(Streptophyte-Vitis_vinifera@17836346227bp:0.08894385071755450678,Streptophyte-Arabidopsis_lyrata@921041227bp:0.59467927651304930414)32:0.04091313457554189570)33:0.02264987221478933707)25:0.0209…
JO802478	0.46	((((((Streptophyte-Brachypodium_distachyon@3g22050.3290bp:0.00000095982920952173,Streptophyte-Brachypodium_distachyon@3g22050.1290bp:0.00000095982920952173)100:0.07520926853339901519,((Streptophyte-Setaria_italica@19693276290bp:0.03891158850365773747,(Streptophyte-Zea_mays@19609584290bp:0.05853951652732800048,Streptophyte-Sorghum_bicolor@149313290bp:0.00268497741131167641)97:0.0219812652193239963…
JO802521	0.32	(Chromera_velia@JO802521301bp:0.16956760112438060140,(Streptophyte-Oryza_sativa@LOC_Os09g04790.1301bp:0.12490798726099762439,(Streptophyte-Setaria_italica@19714111301bp:0.05844269479501196934,((Streptophyte-Aquilegia_coerulea@18162922301bp:0.28830555901022436593,(((Streptophyte-Eucalyptus_grandis@18790481301bp:0.31284985731787101626,((Streptophyte-Citrus_sinensis@18112288301bp:0.19367893465647956…
JO802926	0.61	(Streptophyte-Hordeum_vulgare@Q96468194bp:0.00000089391281112548,((((Streptophyte-Oryza_sativa@LOC_Os02g33450.1194bp:0.02405104026738505776,(Streptophyte-Setaria_italica@19686545194bp:0.01396517083968759274,((Streptophyte-Sorghum_bicolor@148612194bp:0.00987658636429457858,Streptophyte-Zea_mays@19583351194bp:0.00484447237064403007)47:0.00980194286618240977,((((((Green_algae-Micromonas_pusilla@4949…
JO803267	0.18	(Chromera_velia@JO803267705bp:0.10083253883510501225,(Streptophyte-Oryza_sativa@LOC_Os02g36570.1705bp:0.07918570336377180052,((Streptophyte-Setaria_italica@19688322705bp:0.03613320636626577570,(Streptophyte-Sorghum_bicolor@4883384705bp:0.02283261844906856602,Streptophyte-Zea_mays@19624714705bp:0.05026267257034867236)90:0.01290273085586388438)100:0.05021520030138255930,((Streptophyte-Physcomitrell…
JO803523	0.32	(Chromera_velia@JO803523382bp:0.27229711793534999709,((Streptophyte-Zea_mays@19637358382bp:0.17957219735426555030,Streptophyte-Setaria_italica@19679764382bp:0.07096653090480123383)100:0.22248275961185662308,((((Streptophyte-Aquilegia_coerulea@18158565382bp:1.03338990357556848032,Streptophyte-Eucalyptus_grandis@18786365382bp:0.50765669607716490397)23:0.13923155797683836599,(((Streptophyte-Populus_…
JO804285	0.42	((Streptophyte-Zea_mays@19565013202bp:0.00646558654228431787,(Streptophyte-Zea_mays@19507522202bp:0.09888734674427882010,Streptophyte-Zea_mays@19593030202bp:0.00000423613104422840)44:0.00620133218499665725)100:0.47852651547422786482,(((Streptophyte-Oryza_sativa@LOC_Os03g55850.1202bp:0.10581254319109748008,Streptophyte-Setaria_italica@19681512202bp:0.06509226562995484855)43:0.04288327870637882733,…
JO804722	0.39	(((((Streptophyte-Vitis_vinifera@17829513254bp:0.08296459547514720145,(((Streptophyte-Citrus_sinensis@18101946254bp:0.15527799248549267741,(Streptophyte-Cucumis_sativus@16967893254bp:0.18322307550452104907,Streptophyte-Cucumis_sativus@16974800254bp:0.14408385500111917099)82:0.07661902409259889468)9:0.03608261979745689546,((Streptophyte-Eucalyptus_grandis@18783200254bp:0.12031331615246738942,(((St…
JO804824	0.34	((Streptophyte-Oryza_sativa@LOC_Os01g46250.1390bp:0.07133605559133611440,(Streptophyte-Setaria_italica@19677537390bp:0.06051844070943177695,(Streptophyte-Sorghum_bicolor@4800979390bp:0.01570510074216191834,Streptophyte-Zea_mays@19521667390bp:0.07764079280058780452)81:0.02603602553835917058)88:0.04039373615492345554)50:0.02787884301156465933,(((Streptophyte-Setaria_italica@19675529390bp:0.08180189…
JO805002	0.94	(Chromera_velia@JO805002131bp:0.24871731713968131539,((Streptophyte-Oryza_sativa@LOC_Os05g33510.1131bp:0.03548293695640418466,(((Streptophyte-Manihot_esculenta@17984212131bp:0.05536946225798632798,(((Streptophyte-Arabidopsis_lyrata@492686131bp:0.11662497903614725547,(((((Streptophyte-Zea_mays@19598812131bp:0.05086593558800994730,(Streptophyte-Oryza_sativa@LOC_Os03g24600.1131bp:0.02596096659518364…
JO805015	0.46	((Streptophyte-Oryza_sativa@LOC_Os06g01850.1300bp:0.01938909748055825388,((((((Streptophyte-Arabidopsis_lyrata@496993300bp:0.06165940700266495794,(Streptophyte-Ricinus_communis@16802804300bp:0.03614032569795624927,(((Streptophyte-Aquilegia_coerulea@18148492300bp:0.05017895241359197900,Streptophyte-Manihot_esculenta@17966380300bp:0.02038157327628071364)26:0.00723403150942103328,((Streptophyte-Citr…
JO805054	0.24	(((Streptophyte-Oryza_sativa@LOC_Os02g47020.1360bp:0.01625658579545399135,((Streptophyte-Setaria_italica@19687110360bp:0.02361427092959515750,Streptophyte-Sorghum_bicolor@132729360bp:0.04830653091292493734)37:0.00426464957104571735,Streptophyte-Zea_mays@19582668360bp:0.05575949928015733192)30:0.01555274571144384978)53:0.02424259330902958989,((Streptophyte-Oryza_sativa@LOC_Os04g50880.1360bp:0.1613…
JO805284	0.28	(((Streptophyte-Brachypodium_distachyon@4g22700.1393bp:0.17568953037420861896,(((Streptophyte-Aquilegia_coerulea@18162946393bp:0.25437079681773921980,(((((Streptophyte-Arabidopsis_lyrata@492115393bp:0.16198282963856577843,Streptophyte-Arabidopsis_lyrata@918651393bp:0.13749829077421710233)100:0.15018571378080611267,((Streptophyte-Glycine_max@16273670393bp:0.15022591631732959416,Streptophyte-Glycin…
JO805359	0.4	((Streptophyte-Setaria_italica@19678655288bp:0.01643841012312004246,((Streptophyte-Zea_mays@19525077288bp:0.00000095019026611388,Streptophyte-Zea_mays@19525076288bp:0.00000095019026611388)100:0.00740655447352794784,Streptophyte-Sorghum_bicolor@5053222288bp:0.01519416421728372879)98:0.01777602286816921603)83:0.02102144397114123070,((((((Green_algae-Micromonas_pusilla@30929288bp:0.33917545301456247…
JO805420	0.96	(Streptophyte-Setaria_italica@19687734159bp:0.10465509027033792488,((Streptophyte-Sorghum_bicolor@4755800159bp:0.02938704542937542810,Streptophyte-Zea_mays@19584521159bp:0.06136667423417549450)86:0.03498148207546834115,((((Streptophyte-Brachypodium_distachyon@1g36550.2159bp:0.00000094479195742545,Streptophyte-Brachypodium_distachyon@1g36550.1159bp:0.00000094479195742545)100:0.18140676809659583846…
JO805474	0.44	(((Streptophyte-Setaria_italica@19679260225bp:0.00444979352801068342,(Streptophyte-Zea_mays@19602091225bp:0.47397905625574821009,(Streptophyte-Sorghum_bicolor@4745591225bp:0.00000095698313985199,(Streptophyte-Zea_mays@19542661225bp:0.17206834153981312441,(Streptophyte-Zea_mays@19542655225bp:0.00000095698313985199,(Streptophyte-Zea_mays@19542658225bp:0.00000095698313985199,Streptophyte-Zea_mays@19…
JO805620	0.31	((Streptophyte-Sorghum_bicolor@149827410bp:0.01374946379895281186,Streptophyte-Zea_mays@19503885410bp:0.01677485800697960799)89:0.01081531370893462629,(((Streptophyte-Aquilegia_coerulea@18148340410bp:0.07790731986709824308,(((Streptophyte-Arabidopsis_lyrata@475696410bp:0.16580121072490941470,(Streptophyte-Glycine_max@16296904410bp:0.06893182022371893702,Streptophyte-Mimulus_guttatus@009401m410bp:…
JO805756	0.8	((Streptophyte-Oryza_sativa@LOC_Os04g33830.1138bp:0.09986760226230247117,(((Streptophyte-Mimulus_guttatus@018856m138bp:0.16985227373898800773,((Streptophyte-Arabidopsis_lyrata@470899138bp:0.21284839370667496539,(Streptophyte-Citrus_sinensis@18099828138bp:0.05778221470064724002,((Streptophyte-Eucalyptus_grandis@18780917138bp:0.23768038849664624435,Streptophyte-Vitis_vinifera@17841115138bp:0.132552…
JO806075	0.37	(((Streptophyte-Vitis_vinifera@17839425275bp:0.43514724410555710721,Streptophyte-Mimulus_guttatus@004769m275bp:0.44825084199655146344)83:0.20135727506366796202,(Streptophyte-Vitis_vinifera@17816875275bp:0.14766049530867220163,Streptophyte-Vitis_vinifera@17837607275bp:0.00000094682643450433)100:0.34694420238562340142)55:0.09863783203992752824,((((Streptophyte-Brachypodium_distachyon@2g58260.1275bp…
JO806169	0.47	(Chromera_velia@JO806169257bp:0.00000088907944766028,((((Streptophyte-Vitis_vinifera@17821997257bp:0.05513345154829072531,(Streptophyte-Cucumis_sativus@16958769257bp:0.03271219943491566334,((Streptophyte-Arabidopsis_lyrata@920071257bp:0.12772271799107740020,(Streptophyte-Eucalyptus_grandis@18769054257bp:0.02495548971348955300,Streptophyte-Citrus_sinensis@18124684257bp:0.04773936664895121751)23:0.…
JO806347	0.58	((Streptophyte-Setaria_italica@19681241140bp:0.01111464553386112310,Streptophyte-Oryza_sativa@LOC_Os03g11100.1140bp:0.00957673767916627540)46:0.00714236248699083760,(Streptophyte-Sorghum_bicolor@4745355140bp:0.00000092177595924431,(Chromera_velia@JO806347140bp:0.00000092177595924431,(((Streptophyte-Brachypodium_distachyon@1g22790.1140bp:0.05110802771463696104,((Streptophyte-Setaria_italica@197108…
JO806555	0.41	((Streptophyte-Brachypodium_distachyon@4g30060.1233bp:0.06699860332881867053,((((Streptophyte-Sorghum_bicolor@4890990233bp:0.00000085045249410172,Streptophyte-Zea_mays@19586342233bp:0.16996322407504690921)70:0.00451430132664945496,Streptophyte-Zea_mays@19605133233bp:0.01315963253910895983)44:0.00394031402995356772,Streptophyte-Setaria_italica@19693117233bp:0.01373871098268077996)50:0.020514673308…
JO806640	0.3	(Chromera_velia@JO806640242bp:0.01465575631011351368,(Streptophyte-Oryza_sativa@LOC_Os02g03330.1242bp:0.10831916250630174714,(((Streptophyte-Zea_mays@19636968242bp:0.10168104189417923044,Streptophyte-Sorghum_bicolor@4755186242bp:0.02129793611916703383)84:0.05999354404838669330,Streptophyte-Setaria_italica@19686702242bp:0.07730461443774500063)97:0.06138956912084313905,(Streptophyte-Eucalyptus_gran…
JO806693	0.4	(Chromera_velia@JO806693319bp:0.00000084535000669570,(((((Red_algae-Cyanidioschyzon_merolae@CMD011C319bp:0.33503895648575249266,Red_algae-Porphyra_yezoensis@AV439131_3319bp:0.62362851302650523788)100:1.24882859006207636021,(((Green_algae-Chlamydomonas_reinhardtii@129760319bp:0.18767060201568985800,Green_algae-Volvox_carteri@81811319bp:0.18460494533230670244)89:0.17263937931721307084,(Green_algae-…
JO806787	0.28	((Streptophyte-Medicago_truncatula@17476356213bp:0.03326211740249301191,Streptophyte-Glycine_max@16247283213bp:0.06311657168302040044)27:0.02334102183224508187,(Streptophyte-Mimulus_guttatus@015538m213bp:0.09917734934326555285,((Streptophyte-Citrus_sinensis@18129280213bp:0.02351607414020133804,((((Streptophyte-Physcomitrella_patens@232728213bp:0.30941883166355049761,Streptophyte-Physcomitrella_pa…
JO807337	0.51	(Streptophyte-Zea_mays@19503703289bp:0.07428939208257530347,(Streptophyte-Sorghum_bicolor@4894270289bp:0.00000094703410733517,(Streptophyte-Setaria_italica@19700774289bp:0.02742076404952881880,(((((((Glaucophyte-Glaucocystis_nostochinearum@GNL00001507_2289bp:0.63937108657188934657,(Fungi-Aspergillus_niger@208680289bp:0.18141605766505322639,Fungi-Neurospora_crassa@NCU10732T0289bp:0.273872709789997…
JO807356	0.42	(Chromera_velia@JO807356236bp:0.11887295819800366981,(((Streptophyte-Sorghum_bicolor@5051232236bp:0.02806006592859554630,Streptophyte-Zea_mays@19552696236bp:0.02382182557110828700)97:0.04105543272808868244,Streptophyte-Setaria_italica@19713392236bp:0.04755307196303926176)94:0.07428019528954862838,(((Streptophyte-Vitis_vinifera@17820920236bp:0.12892271403633970284,(((((Streptophyte-Arabidopsis_lyr…
JO808541	0.36	(Streptophyte-Arabidopsis_lyrata@889141340bp:0.09279420342550825929,(((((Streptophyte-Citrus_sinensis@18113969340bp:0.07012661801676219053,Streptophyte-Populus_trichocarpa@659896340bp:0.03930990135707548849)18:0.00620169170493259717,((Streptophyte-Vitis_vinifera@17826719340bp:0.04067338585884690272,((Streptophyte-Cucumis_sativus@16963221340bp:0.06676312261666621228,(Streptophyte-Cucumis_sativus@1…
JO808912	0.6	((((Streptophyte-Setaria_italica@19686208183bp:0.00102337136751205803,(Streptophyte-Sorghum_bicolor@4852634183bp:0.00823286415063089957,Streptophyte-Zea_mays@19577424183bp:0.02945080450266191266)37:0.02240874576127305576)85:0.05313204876355657330,((Streptophyte-Eucalyptus_grandis@18759559183bp:0.26445009498302846085,(((((Streptophyte-Physcomitrella_patens@230823183bp:0.10172302659603543740,(((((P…
JO809198	0.36	(Chromera_velia@JO809198310bp:0.21091620969792251872,((((Green_algae-Chlorella_vulgaris@34513310bp:1.66477332825926405135,(Streptophyte-Physcomitrella_patens@138266310bp:0.50585806389383802806,Streptophyte-Selaginella_moellendorffii@232511310bp:0.57447552213193475712)79:0.19484912279549307379)97:0.33843969638590343241,((((Streptophyte-Mimulus_guttatus@013030m310bp:0.18643912316546465413,Streptoph…
JO809625	0.35	((Streptophyte-Sorghum_bicolor@5056539439bp:0.01374291276846977689,Streptophyte-Zea_mays@19592109439bp:0.03946089100321117926)100:0.08999504330669232111,(((Streptophyte-Oryza_sativa@LOC_Os11g16330.1439bp:0.85224639602841012476,((Streptophyte-Physcomitrella_patens@224718439bp:0.64968732293181785664,(((Green_algae-Volvox_carteri@94568439bp:0.67516245438096589293,Green_algae-Chlamydomonas_reinhardti…
JO809955	0.42	(Chromera_velia@JO809955393bp:0.00000092261466285043,((((((Streptophyte-Citrus_sinensis@18133492393bp:0.03579613137407102602,(((Streptophyte-Eucalyptus_grandis@18759392393bp:0.03031983075894157179,Streptophyte-Vitis_vinifera@17841613393bp:0.03879575950038065962)55:0.01442829873611639266,(Streptophyte-Manihot_esculenta@17974342393bp:0.02308857056631162530,Streptophyte-Manihot_esculenta@17968276393…
JO810726	0.12	((Streptophyte-Oryza_sativa@LOC_Os01g51410.2948bp:0.00000093462455927054,Streptophyte-Oryza_sativa@LOC_Os01g51410.1948bp:0.00000093462455927054)100:0.00795935843358855366,((((Streptophyte-Cucumis_sativus@16983305948bp:0.05472238807613753753,((Streptophyte-Eucalyptus_grandis@18791972948bp:0.05048218665646066194,((((Streptophyte-Mimulus_guttatus@010936m948bp:0.08536213656415039819,(Streptophyte-Vit…
JO810909	0.23	(((Streptophyte-Zea_mays@19558993498bp:0.01315866526931219749,Streptophyte-Sorghum_bicolor@5051800498bp:0.01537231293238343864)66:0.00683062206773197081,(((Streptophyte-Physcomitrella_patens@200712498bp:0.30047006924431840513,((Streptophyte-Selaginella_moellendorffii@77165498bp:0.44895761180657556277,((Streptophyte-Aquilegia_coerulea@18143414498bp:0.16070488306263419620,(((Streptophyte-Setaria_it…
JO811026	0.45	(((Streptophyte-Setaria_italica@19678379305bp:0.05735107839025299636,((Streptophyte-Oryza_sativa@LOC_Os05g24550.3305bp:0.00000089328435005050,Streptophyte-Oryza_sativa@LOC_Os05g24550.1305bp:0.00000089328435005050)100:0.06368449013636694189,(((((Streptophyte-Glycine_max@16253780305bp:0.05458179390807507692,Streptophyte-Medicago_truncatula@17478186305bp:0.07203916606613137985)98:0.06987954803408412…
JO811029	0.45	(Chromera_velia@JO811029263bp:0.02131148864206110563,((Streptophyte-Zea_mays@19508281263bp:0.00844751770933357959,Streptophyte-Sorghum_bicolor@4768887263bp:0.00358042360840458334)78:0.02010234589804246047,((Streptophyte-Citrus_sinensis@18094997263bp:0.03162053527830753497,((Streptophyte-Arabidopsis_lyrata@897138263bp:0.18232176378917067106,(Streptophyte-Glycine_max@16253222263bp:0.087737148061594…
JO811276	0.62	(Chromera_velia@JO811276176bp:0.00000089542861049273,((((Streptophyte-Oryza_sativa@LOC_Os12g40130.1176bp:0.30078297796544889442,Streptophyte-Oryza_sativa@LOC_Os12g39860.1176bp:0.08614835623655077435)72:0.04029852312024286703,(((Streptophyte-Setaria_italica@19700159176bp:0.12941492259351339289,Streptophyte-Sorghum_bicolor@5059738176bp:0.00000089542861049273)48:0.00627661468787041928,(Streptophyte-…
JO811290	0.21	((((Streptophyte-Arabidopsis_lyrata@885039425bp:0.04846008373665069285,((Streptophyte-Medicago_truncatula@17466456425bp:0.01300389883521193418,(Streptophyte-Glycine_max@16249414425bp:0.01699664671205933231,Streptophyte-Glycine_max@16296576425bp:0.00496410134669527780)90:0.00582707774332027594)56:0.00494564882168159557,(((Streptophyte-Glycine_max@16262419425bp:0.00743417055483359263,Streptophyte-G…
JO811444	0.09	((Streptophyte-Brachypodium_distachyon@1g46670.1805bp:0.01048836142627941267,(Streptophyte-Oryza_sativa@LOC_Os06g09450.1805bp:0.03098109409068577902,((Streptophyte-Zea_mays@19541753805bp:0.01934659340316441725,((Streptophyte-Setaria_italica@19702971805bp:0.00000090870232699721,Streptophyte-Setaria_italica@19702972805bp:0.00000090870232699721)100:0.01020897228249429550,Streptophyte-Sorghum_bicolor…
JO811468	0.99	(Chromera_velia@JO811468109bp:0.00000095221674982635,((Streptophyte-Setaria_italica@19696826109bp:0.05343460774449899225,(Streptophyte-Sorghum_bicolor@5059425109bp:0.03047854336350706850,Streptophyte-Zea_mays@19614006109bp:0.00000095221674982635)98:0.03260941812361545927)90:0.10912978849459926967,(Streptophyte-Brachypodium_distachyon@4g40800.1109bp:0.02621247192950848862,(((Streptophyte-Populus_t…
JO811678	0.22	(Streptophyte-Setaria_italica@19688621493bp:0.29418686900426460618,((((Streptophyte-Sorghum_bicolor@5048563493bp:0.11441131891682784771,Streptophyte-Sorghum_bicolor@4776325493bp:0.18668696922782737624)100:0.41721642895783289662,((Streptophyte-Oryza_sativa@LOC_Os10g09160.1493bp:0.39499092835189159034,(Streptophyte-Zea_mays@19608786493bp:0.32837803885763694467,Streptophyte-Brachypodium_distachyon@3…
JO812895	0.17	(((Streptophyte-Brachypodium_distachyon@5g08280.1651bp:0.18651558880774804505,(Streptophyte-Oryza_sativa@LOC_Os04g32060.2651bp:0.12728629317545334110,(Streptophyte-Setaria_italica@19694901651bp:0.07516067956827815477,(Streptophyte-Sorghum_bicolor@4887393651bp:0.04993603475033098205,Streptophyte-Zea_mays@19554417651bp:0.09658813543126495982)99:0.05086047506150658676)99:0.11442292169173158556)41:0.…
JO813025	0.14	(Chromera_velia@JO813025531bp:0.05378989996442971877,(((Streptophyte-Sorghum_bicolor@4754817531bp:0.01842539491270519386,(Streptophyte-Zea_mays@19561731531bp:0.16047955723309059728,Streptophyte-Zea_mays@19571153531bp:0.00000087051850948076)95:0.02497619198862986029)72:0.01062750721156349373,Streptophyte-Setaria_italica@19676436531bp:0.02575047438369965080)85:0.02762103812734725480,((Streptophyte-…
JO813235	0.65	(((Streptophyte-Setaria_italica@19697646155bp:0.03192978087272219795,((((((Streptophyte-Cucumis_sativus@16952304155bp:0.26444139878149525158,((Streptophyte-Arabidopsis_lyrata@488420155bp:0.90018605398218742852,Streptophyte-Citrus_sinensis@18094219155bp:0.58576676393857773917)55:0.10741194002624129822,((Streptophyte-Aquilegia_coerulea@18162115155bp:0.21528255748801450320,((((Streptophyte-Ricinus_c…
JO813268	0.3	(((Streptophyte-Oryza_sativa@LOC_Os03g56280.1338bp:0.06963262273861964280,((Streptophyte-Zea_mays@19603175338bp:0.03616873859072043673,Streptophyte-Sorghum_bicolor@147126338bp:0.03411262518927413168)67:0.01436719522389737561,Streptophyte-Setaria_italica@19679640338bp:0.03329588003975415128)77:0.05023556999770526638)60:0.01888991835102389952,(((Streptophyte-Selaginella_moellendorffii@270780338bp:0…
JO813344	0.36	((Streptophyte-Setaria_italica@19711322310bp:0.02885548336984774392,(Streptophyte-Sorghum_bicolor@147755310bp:0.02118869475407299252,Streptophyte-Zea_mays@19531220310bp:0.02462904904025885189)82:0.02230253623227171703)74:0.04199268622747032859,(((Green_algae-Chlamydomonas_reinhardtii@397276310bp:0.11927725153609748665,Green_algae-Volvox_carteri@109718310bp:0.06200231940308828515)100:1.88680980005…
JO813467	0.55	(Chromera_velia@JO813467122bp:0.00000104665373904092,(Streptophyte-Hordeum_vulgare@A1E9M7122bp:0.00000104665373904092,(((((Streptophyte-Eucalyptus_grandis@18803260122bp:0.02835140941121329361,Streptophyte-Eucalyptus_grandis@18799774122bp:0.14168853981014695176)95:0.05358045674108829343,Streptophyte-Arabidopsis_lyrata@892892122bp:0.04616099946643812540)49:0.00962002988805067162,Streptophyte-Medica…
JO813804	0.74	(Streptophyte-Triticum_aestivum@Q41582154bp:0.00830834283796232607,((Streptophyte-Brachypodium_distachyon@3g26390.2154bp:0.04435741741708246200,(((Streptophyte-Setaria_italica@19698040154bp:0.07151731053300858232,(((Streptophyte-Zea_mays@19558392154bp:0.10980089223096034523,Streptophyte-Zea_mays@19558391154bp:0.00000090697127906709)99:0.03017297914205404469,Streptophyte-Sorghum_bicolor@148851154b…
JO813965	0.52	(Streptophyte-Arabidopsis_lyrata@492014219bp:0.31123933813565246576,(Streptophyte-Aquilegia_coerulea@18151548219bp:0.24961464886785286743,((((Streptophyte-Glycine_max@16296082219bp:0.16726160882292684384,(Streptophyte-Glycine_max@16257475219bp:0.06618007157950180075,(Streptophyte-Medicago_truncatula@17451416219bp:0.00000093265179874499,Streptophyte-Medicago_truncatula@17451415219bp:0.005094232143…
