# Supplementary material for: Re-evaluating the Green versus Red Signal in Eukaryotes with Secondary Plastid of Red Algal Origin
Source: Oxford University Press journal article supplement (doi:10.1093/gbe/evs049), 2012-01-01
Supplement: evs049_Supplementary_Data.zip [file evs049_Supplementary_Data.zip › TableS2.xls]

## Sheet: ID.txt
Table S2. Trees supporting HGT from Bactera
HO864781	(Chromera_velia@HO864781289bp:0.26884957761095445994,((Metazoa-Nematostella_vectensis@238019289bp:1.01116752566576884043,((((((Prok-Beta-Acidovorax_delafieldii@241762772289bp:1.00293196182018662377,Prok-DeEp-Desulfatibacillum_alkenivorans@218781994289bp:1.29520899112715537349)45:0.14595967087077180158,Prok-Firm-Natranaerobius_thermophilus@188586770289bp:0.49356999108485921646)27:0.068554499668828…
HO864998	(Fungi-Aspergillus_niger@53541637bp:0.45819358901344564572,(((Prok-Gamma-Shewanella_sediminis@157373803637bp:0.46627602255699707179,(Prok-DeEp-Desulfovibrio_piger@212702331637bp:0.59225464457916543459,Prok-Beta-Cupriavidus_metallidurans@94314321637bp:0.37893880456784645450)44:0.05033057681871624944)69:0.12790697384294710814,(Prok-Beta-Cupriavidus_metallidurans@94314334637bp:0.40944773134672279857…
HO866373	((P-Apicomplexa-Plasmodium_berghei@PB000319.00.0465bp:0.07021614400517517396,P-Apicomplexa-Plasmodium_chabaudi@PCAS_082330465bp:0.00669644898240634532)97:0.10890961998557938117,((P-Apicomplexa-Cryptosporidium_parvum@cgd6_4570465bp:0.00376471649269942378,P-Apicomplexa-Cryptosporidium_hominis@Chro.60524465bp:0.00000090404496281308)100:0.62055898892767080710,((P-Apicomplexa-Neospora_caninum@NCLIV_03…
HO866428	((((Prok-Verr-Coraliomargarita_akajimensis@294055724448bp:0.28182967737122399665,(Prok-Gamma-Shewanella_piezotolerans@212634218448bp:0.11283200621841718569,Prok-Gamma-Vibrio_splendidus@218676642448bp:0.08737557217459664127)100:0.08058977773555017765)68:0.04447713885380633753,((Prok-Bacter-Flavobacterium_johnsoniae@146298903448bp:0.47310367819856352645,((((Prok-Plan-Planctomyces_maris@149174299448…
JO786646	(Prok-Gamma-Alcanivorax_borkumensis@110834994621bp:0.42315212773769311783,((Prok-Alpha-alpha_proteobacterium@163795474621bp:0.23751348885262660304,Prok-Alpha-Rhodospirillum_rubrum@83594816621bp:0.20455306816961560390)31:0.05409330070678359387,(Chromera_velia@JO786646621bp:0.80737939895952870462,((Prok-Spir-Treponema_pallidum@189026061621bp:0.33544617822344896529,(Prok-Spir-Treponema_denticola@425…
JO786765	(Prok-Gamma-Halothiobacillus_neapolitanus@261856628130bp:0.24147015475469477130,(Chromera_velia@JO786765130bp:1.16549332265924832086,((Prok-DeEp-Myxococcus_xanthus@108762003130bp:0.33022104357608667025,(((Prok-Alpha-Orientia_tsutsugamushi@189183837130bp:0.37458557748003962207,Prok-Alpha-Wolbachia_endosymbiont@213019540130bp:0.28323625859132511851)32:0.11015034643634900868,Prok-Alpha-Rickettsia_be…
JO786935	((((((((Prok-Cren-Sulfolobus_islandicus@238619193400bp:0.09655722023385143737,Prok-Cren-Sulfolobus_solfataricus@15899262400bp:0.08686508349287173913)94:0.06789399917410805785,Prok-Cren-Sulfolobus_acidocaldarius@70607565400bp:0.16958993316478868096)100:0.68581308442253474666,Prok-Ther-Thermotoga_lettingae@157363604400bp:0.66148580458365435764)93:0.24205847696695934057,(((((Fungi-Aspergillus_niger@…
JO796005	(Prok-Alpha-Fulvimarina_pelagi@114705052553bp:0.18152739945477622263,(Prok-Alpha-Magnetospirillum_magneticum@83312567553bp:0.45642461904899361835,(Chromera_velia@JO796005553bp:0.56381778747522104389,((((((Prok-Beta-Achromobacter_piechaudii@293602818553bp:0.32954013163769702022,Prok-Gamma-Cellvibrio_japonicus@192361320553bp:0.41630523201003161171)45:0.06548194760692287175,(Prok-Cyano-Synechococcus…
JO796168	(Prok-Beta-Variovorax_paradoxus@239816282247bp:0.13579867505457188237,((Prok-Gamma-Enterobacter_cloacae@296104331247bp:0.13987845572453591614,(Prok-Gamma-Acinetobacter_baumannii@213156773247bp:0.14960682934765603957,Prok-Gamma-Pseudomonas_putida@148550478247bp:0.10729114418834914679)88:0.07403450060693100854)93:0.11422878806859619594,(((Prok-Alpha-Methylobacterium_radiotolerans@170749408247bp:0.1…
JO801168	((Excavate-Naegleria_gruberi@estExt_gwp_gw1.C_180046376bp:0.71048787209900610140,((Choanozoa-Monosiga_brevicolis@33424376bp:0.62296442811644903159,Choanozoa-Salpingoeca_sp@326429942376bp:0.44583048882115655642)95:0.19153364860890348398,((Metazoa-Nematostella_vectensis@836376bp:0.49840418984689910387,(Metazoa-Trichoplax_adhaerens@35864376bp:0.49150153370519011897,((Metazoa-Nematostella_vectensis@3…
JO801391	(Prok-DeEp-Desulfovibrio_vulgaris@218886936328bp:0.20762328375733016261,((((Prok-Ther-Thermotoga_naphthophila@281411851328bp:0.48594114509483304909,((Prok-Aqui-Hydrogenobacter_thermophilus@288818840328bp:0.79967933401570323593,(Prok-Fuso-Fusoerium_nucleatum@19705005328bp:0.26360212911697322724,Prok-Firm-Clostridium_carboxidivorans@296186735328bp:0.17693261290507225625)100:1.10376224260298161362)6…
JO802465	(Chromera_velia@JO802465466bp:1.09659093940725171912,(((Fungi-Aspergillus_niger@45729466bp:1.00737636001012798026,(Prok-Firm-Clostridium_phytofermentans@160880294466bp:0.59648631205816249334,Prok-Firm-Staphylococcus_carnosus@224477928466bp:0.75295533221531107948)54:0.09137530855292806675)94:0.31022293447024784641,(Prok-Bacter-Flavobacteriales_bacterium@163785912466bp:0.64716713538348713541,(Prok-…
JO804352	((Prok-Alpha-Sagittula_stellata@126732422250bp:0.17346791769627595281,Prok-Alpha-Rhizobium_etli@218679922250bp:0.13276813272826568091)41:0.04034770482265915420,(Prok-Gamma-Klebsiella_pneumoniae@238893622250bp:0.35013530888660771012,(Chromera_velia@JO804352250bp:0.37255137766051515946,(((((Fungi-Aspergillus_niger@178895250bp:0.97914192306242198161,Fungi-Neurospora_crassa@NCU03893T0250bp:0.60183858…
JO805358	((Prok-Alpha-Stappia_aggregata@118588655308bp:0.13660489870589789807,Prok-Alpha-Thalassiobium_sp@255263545308bp:0.15255034719664842258)64:0.07178641697124231447,(Chromera_velia@JO805358308bp:0.27252756355570856295,((P-Stramenopile-Fragilariopsis_cylindrus@224330308bp:0.28603264316363397057,P-Stramenopile-Phaeodactylum_tricornutum@41766308bp:0.26355636652126146480)86:0.14784559864423296727,(((((P-…
JO807691	(Prok-Cyano-Cyanothece_sp@172035688480bp:0.41706575075658236518,(Chromera_velia@JO807691480bp:1.35700360935157027242,((((Green_algae-Volvox_carteri@93787480bp:0.03407294537205100143,Green_algae-Volvox_carteri@31042480bp:0.01403705913726149314)100:1.01792881338309837425,((P-Rhizaria-Bigelowiella_natans@51511480bp:0.34994093015868915630,P-Rhizaria-Lotharella_globosa@@MMETSP0041-20110527-1454480bp:0…
JO808600	((P-Dinoflagellate-Karlodinium_micrum@KML00001670_2458bp:0.36760223882091064285,((Prok-DeEp-Sorangium_cellulosum@162450030458bp:0.58446574286005159582,(Prok-Gamma-Xanthomonas_fuscans@294665906458bp:0.58704518074662737082,Prok-Gamma-Kangiella_koreensis@256821773458bp:0.52109401259576915155)100:0.39313858133588586163)100:0.27641857521954743548,((Prok-DeEp-Stigmatella_aurantiaca@115375153458bp:0.102…
JO812054	((Prok-Beta-Neisseria_meningitidis@254805428168bp:0.06599227023366315004,Prok-Beta-Neisseria_flavescens@241759493168bp:0.08249803548794724939)96:0.13440332715229444394,(((Prok-Alpha-Rhodospirillum_centenum@209964531168bp:0.12625185075127090539,(Prok-Alpha-Magnetospirillum_magnetotacticum@23012760168bp:0.11141252427412202952,Prok-Alpha-Magnetospirillum_magneticum@83311673168bp:0.121942848494056746…
JO814279	(Chromera_velia@JO814279185bp:1.39470829096180892748,(Prok-Cyano-Acaryochloris_marina@158336166185bp:0.41229292587706967144,(((Prok-Alpha-Erythrobacter_litoralis@85373902185bp:0.45283949851179394752,(Prok-Bacter-Microscilla_marina@124006910185bp:0.24861004313552934053,Prok-Bacter-Psychroflexus_torquis@91215618185bp:0.60626337460449197803)61:0.10889825502156878778)98:0.34834440379867387394,((Prok-…
