# Supplementary material for: Re-evaluating the Green versus Red Signal in Eukaryotes with Secondary Plastid of Red Algal Origin
Source: Oxford University Press journal article supplement (doi:10.1093/gbe/evs049), 2012-01-01
Supplement: evs049_Supplementary_Data.zip [file evs049_Supplementary_Data.zip › TableS3.xls]

## Sheet: Sheet1
Table S3. Taxa included
	Group	Taxon	Plastid	Data type
	Amoebozoa	Acanthamoeba_astronyxis	no	ESTs
	Amoebozoa	Acanthamoeba_castellanii	no	ESTs
	Amoebozoa	Dictyostelium_discoideum	no	Genomes
	Amoebozoa	Dictyostelium_purpureum	no	Genomes
	Amoebozoa	Polysphondylium_pallidum	no	Genomes
Alveolate	Apicomplexa	Cryptosporidium_hominis	no	Genomes
Alveolate	Apicomplexa	Cryptosporidium_parvum	no	Genomes
Alveolate	Apicomplexa	Neospora_caninum	yes	Genomes
Alveolate	Apicomplexa	Plasmodium_berghei	yes	Genomes
Alveolate	Apicomplexa	Plasmodium_chabaudi	yes	Genomes
Alveolate	Apicomplexa	Plasmodium_falciparum	yes	Genomes
Alveolate	Apicomplexa	Toxoplasma_gondii	yes	Genomes
	Choanozoa	Monosiga_brevicolis	no	Genomes
	Choanozoa	Salpingoeca_sp	no	Genomes
Alveolate	Ciliates	Paramecium_tetraurelia	no	Genomes
Alveolate	Ciliates	Tetrahymena_thermophila	no	Genomes
	Cryptomonad	Cryptomonas_paramecium	yes	ESTs
	Cryptomonad	Guillardia_theta	yes	Genomes
	Cryptomonad	Hemiselmis_andersenii	yes	ESTs
Stramenopiles	Diatom	Fragilariopsis_cylindrus	yes	Genomes
Stramenopiles	Diatom	Phaeodactylum_tricornutum	yes	Genomes
Stramenopiles	Diatom	Thalassiosira_pseudonana	yes	Genomes
Alveolate	Dinoflagellate	Alexandrium_catenella	yes	ESTs
Alveolate	Dinoflagellate	Alexandrium_tamarense	yes	ESTs
Alveolate	Dinoflagellate	Amphidinium_carterae	yes	ESTs
Alveolate	Dinoflagellate	Karenia_brevis	yes	ESTs
Alveolate	Dinoflagellate	Karlodinium_micrum	yes	ESTs
Alveolate	Dinoflagellate	Oxyrrhis_marina	NA	ESTs
Alveolate	Dinoflagellate	Perkinsus_marinus	yes	Genomes
	Excavate	Euglena_gracilis	yes	ESTs
	Excavate	Euglena_mutabilis	yes	ESTs
	Excavate	Naegleria_gruberi	no	Genomes
	Fungi	Aspergillus_niger	no	Genomes
	Fungi	Batrachochytrium_dendrobatidis	no	Genomes
	Fungi	Coprinopsis_cinerea	no	Genomes
	Fungi	Cryptococcus_neoformans	no	Genomes
	Fungi	Laccaria_bicolor	no	Genomes
	Fungi	Neurospora_crassa	no	Genomes
	Fungi	Phycomyces_blakesleeanus	no	Genomes
	Fungi	Schizosaccharomyces_pompe	no	Genomes
	Fungi	Ustilago_maydis	no	Genomes
	Glaucophyte	Cyanophora_paradoxa	yes	ESTs
	Glaucophyte	Glaucocystis_nostochinearum	yes	ESTs
	Green_algae	Chlamydomonas_reinhardtii	yes	Genomes
	Green_algae	Chlorella_vulgaris	yes	Genomes
	Green_algae	Coccomyxa_sp	yes	Genomes
	Green_algae	Micromonas_pusilla	yes	Genomes
	Green_algae	Micromonas_sp	yes	Genomes
	Green_algae	Ostreococcus_lucimarinus	yes	Genomes
	Green_algae	Ostreococcus_tauri	yes	Genomes
	Green_algae	Volvox_carteri	yes	Genomes
	Haptophyte	Emiliania_huxleyi	yes	Genomes
	Haptophyte	Pavlova_lutheri	yes	ESTs
	Haptophyte	Prymnesium_parvum	yes	ESTs
	Ichthyosporea	Capsaspora_owczarzaki	no	Genomes
	Metazoa	Branchiostoma_floridae	no	Genomes
	Metazoa	Ciona_intestinalis	no	Genomes
	Metazoa	Danio_rerio	no	Genomes
	Metazoa	Daphnia_pulex	no	Genomes
	Metazoa	Gallus_gallus	no	Genomes
	Metazoa	Homo_sapiens	no	Genomes
	Metazoa	Lottia_gigantea	no	Genomes
	Metazoa	Mus_musculus	no	Genomes
	Metazoa	Nematostella_vectensis	no	Genomes
	Metazoa	Rattus_norvegicus	no	Genomes
	Metazoa	Trichoplax_adhaerens	no	Genomes
	Metazoa	Xenopus_tropicalis	no	Genomes
Stramenopiles	Oomycete	Phytophthora_capsici	no	Genomes
Stramenopiles	Oomycete	Phytophthora_ramorum	no	Genomes
Stramenopiles	Oomycete	Phytophthora_sojae	no	Genomes
Stramenopiles	Oomycete	Saprolegnia_parasitica	no	Genomes
	Prokaryotes	Acidobacteria	no	Genomes
	Prokaryotes	Alphaproteobacteria	no	Genomes
	Prokaryotes	Aquificae	no	Genomes
	Prokaryotes	Bacteroidetes	no	Genomes
	Prokaryotes	Betaproteobacteria	no	Genomes
	Prokaryotes	Chlamydiae	no	Genomes
	Prokaryotes	Chlorobi	no	Genomes
	Prokaryotes	Chloroflexi	no	Genomes
	Prokaryotes	Crenarchaeota	no	Genomes
	Prokaryotes	Cyanobacteria	no	Genomes
	Prokaryotes	Deinococcus	no	Genomes
	Prokaryotes	DeltaEpsilonproteobacteria	no	Genomes
	Prokaryotes	Euryarchaeota	no	Genomes
	Prokaryotes	Firmicutes	no	Genomes
	Prokaryotes	Fusobacteria	no	Genomes
	Prokaryotes	Gammaproteobacteria	no	Genomes
	Prokaryotes	Korarchaeota	no	Genomes
	Prokaryotes	Nanoarchaeota	no	Genomes
	Prokaryotes	Planctomycetes	no	Genomes
	Prokaryotes	Spirochaetes	no	Genomes
	Prokaryotes	Tenericutes	no	Genomes
	Prokaryotes	Thermotogae	no	Genomes
	Prokaryotes	Thermus	no	Genomes
	Prokaryotes	Verrucomicrobia	no	Genomes
	Red_algae	Calliarthron_tuberculosum	yes	ESTs
	Red_algae	Chondrus_crispus	yes	ESTs
	Red_algae	Cyanidioschyzon_merolae	yes	Genomes
	Red_algae	Eucheuma_denticulatum	yes	ESTs
	Red_algae	Galdieria_sulphuraria	yes	ESTs
	Red_algae	Gracilaria_changii	yes	ESTs
	Red_algae	Griffithsia_okiensis	yes	ESTs
	Red_algae	Porphyra_yezoensis	yes	ESTs
	Red_algae	Porphyridium_cruentum	yes	ESTs
	Rhizaria	Bigelowiella_natans	yes	Genomes
	Rhizaria	Cercomonas_longicauda	no	ESTs
	Rhizaria	Gromia_sphaerica	no	ESTs
	Rhizaria	Lotharella_globosa	yes	ESTs
	Rhizaria	Lotharella_oceanica	yes	ESTs
	Rhizaria	Reticulomyxa_filosa	no	ESTs
Stramenopile		Aureococcus_anophageferrens	yes	Genomes
Stramenopile		Blastocystis_hominis	no	Genomes
Stramenopile		Ectocarpus_siliculosus	yes	Genomes
	Streptophyte	Aquilegia_coerulea	yes	Genomes
	Streptophyte	Arabidopsis_lyrata	yes	Genomes
	Streptophyte	Brachypodium_distachyon	yes	Genomes
	Streptophyte	Citrus_sinensis	yes	Genomes
	Streptophyte	Cucumis_sativus	yes	Genomes
	Streptophyte	Eucalyptus_grandis	yes	Genomes
	Streptophyte	Glycine_max	yes	Genomes
	Streptophyte	Manihot_esculenta	yes	Genomes
	Streptophyte	Medicago_truncatula	yes	Genomes
	Streptophyte	Mesostigma_viride	yes	ESTs
	Streptophyte	Mimulus_guttatus	yes	Genomes
	Streptophyte	Oryza_sativa	yes	Genomes
	Streptophyte	Physcomitrella_patens	yes	Genomes
	Streptophyte	Populus_trichocarpa	yes	Genomes
	Streptophyte	Ricinus_communis	yes	Genomes
	Streptophyte	Selaginella_moellendorffii	yes	Genomes
	Streptophyte	Setaria_italica	yes	Genomes
	Streptophyte	Sorghum_bicolor	yes	Genomes
	Streptophyte	Vitis_vinifera	yes	Genomes
	Streptophyte	Zea_mays	yes	Genomes
