# Supplementary figures and images for: Re-evaluating the Green versus Red Signal in Eukaryotes with Secondary Plastid of Red Algal Origin
Source: Oxford University Press journal article supplement (doi:10.1093/gbe/evs049), 2012-01-01

A

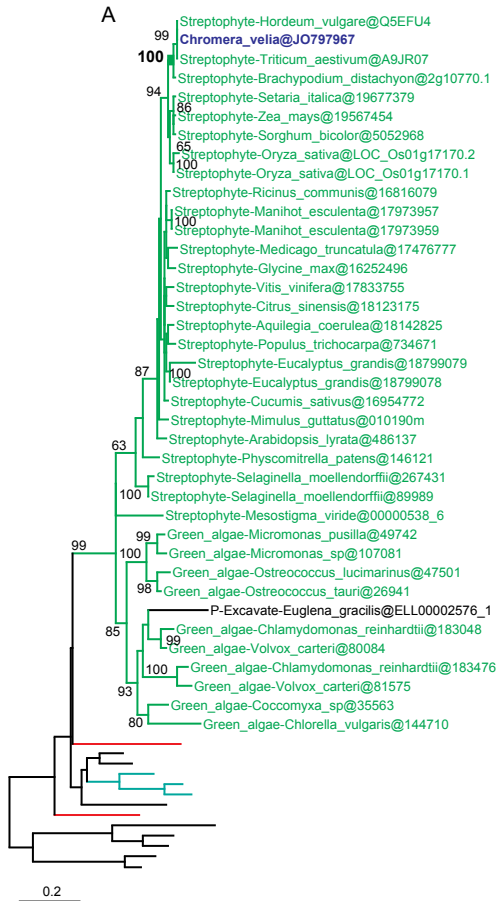

B

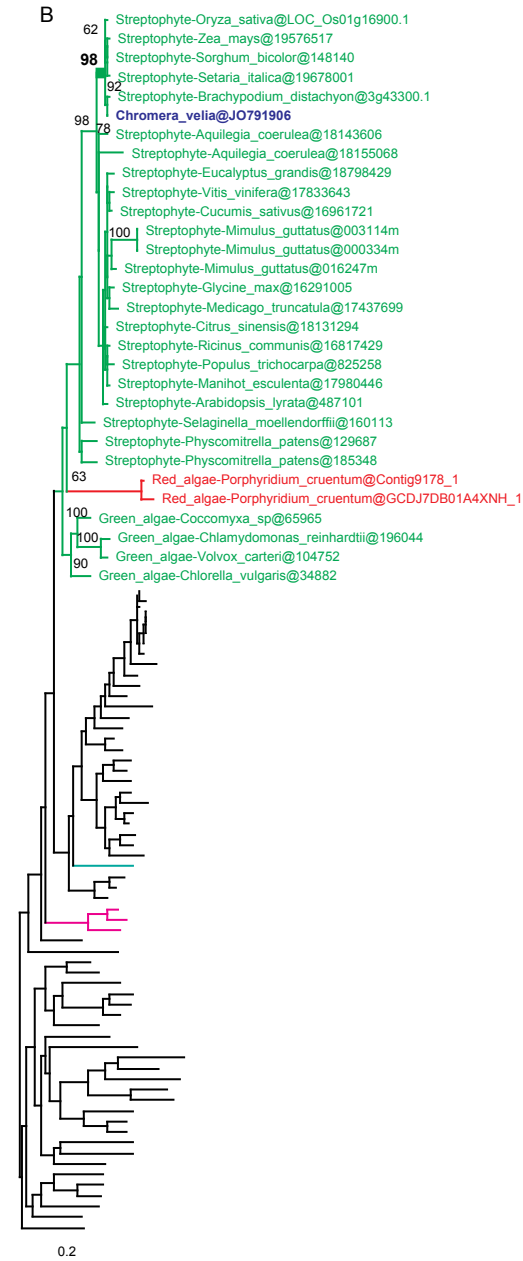

Supplement: evs049_Supplementary_Data.zip [file evs049_Supplementary_Data.zip › FigureS1.pdf]

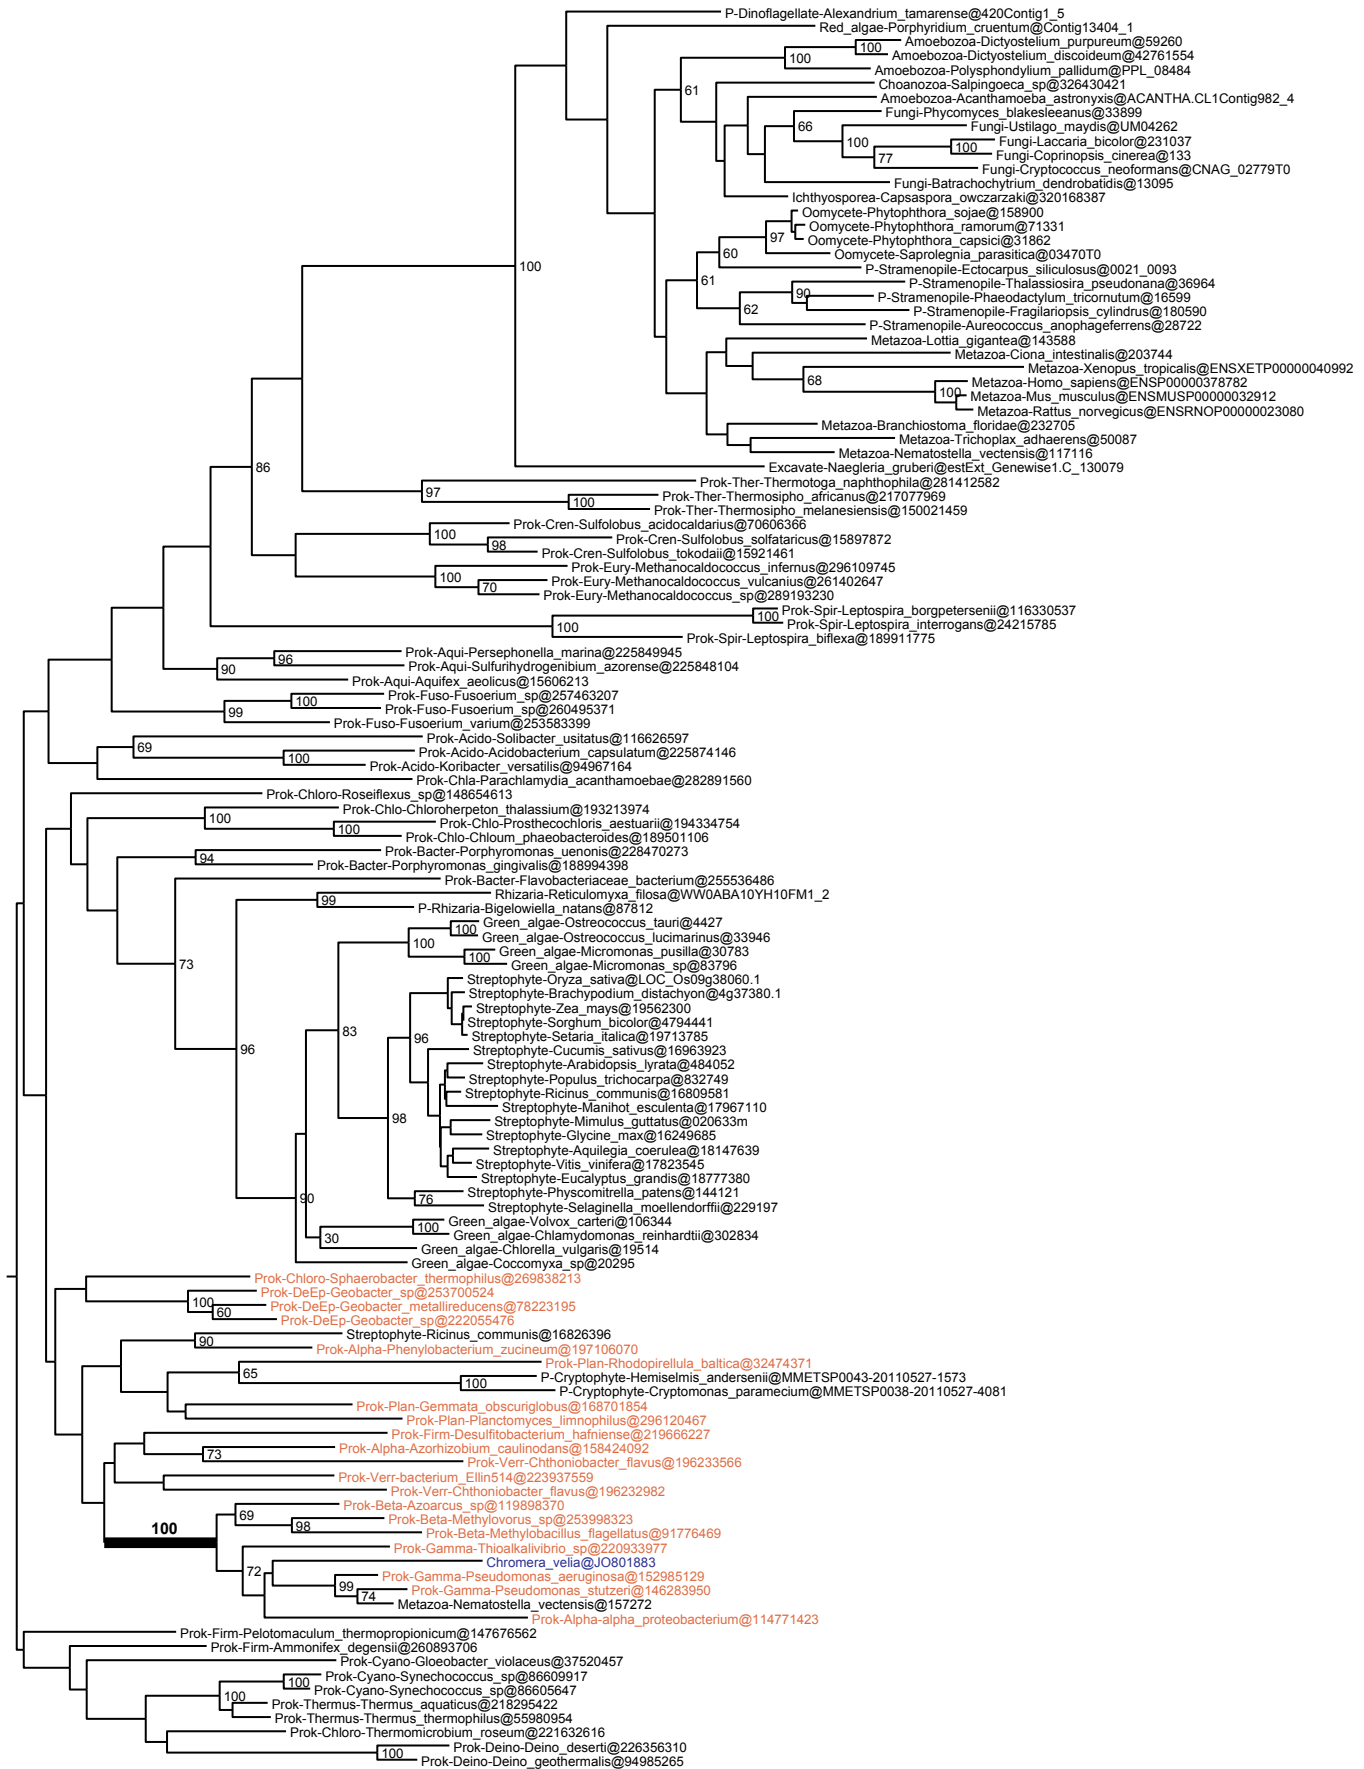

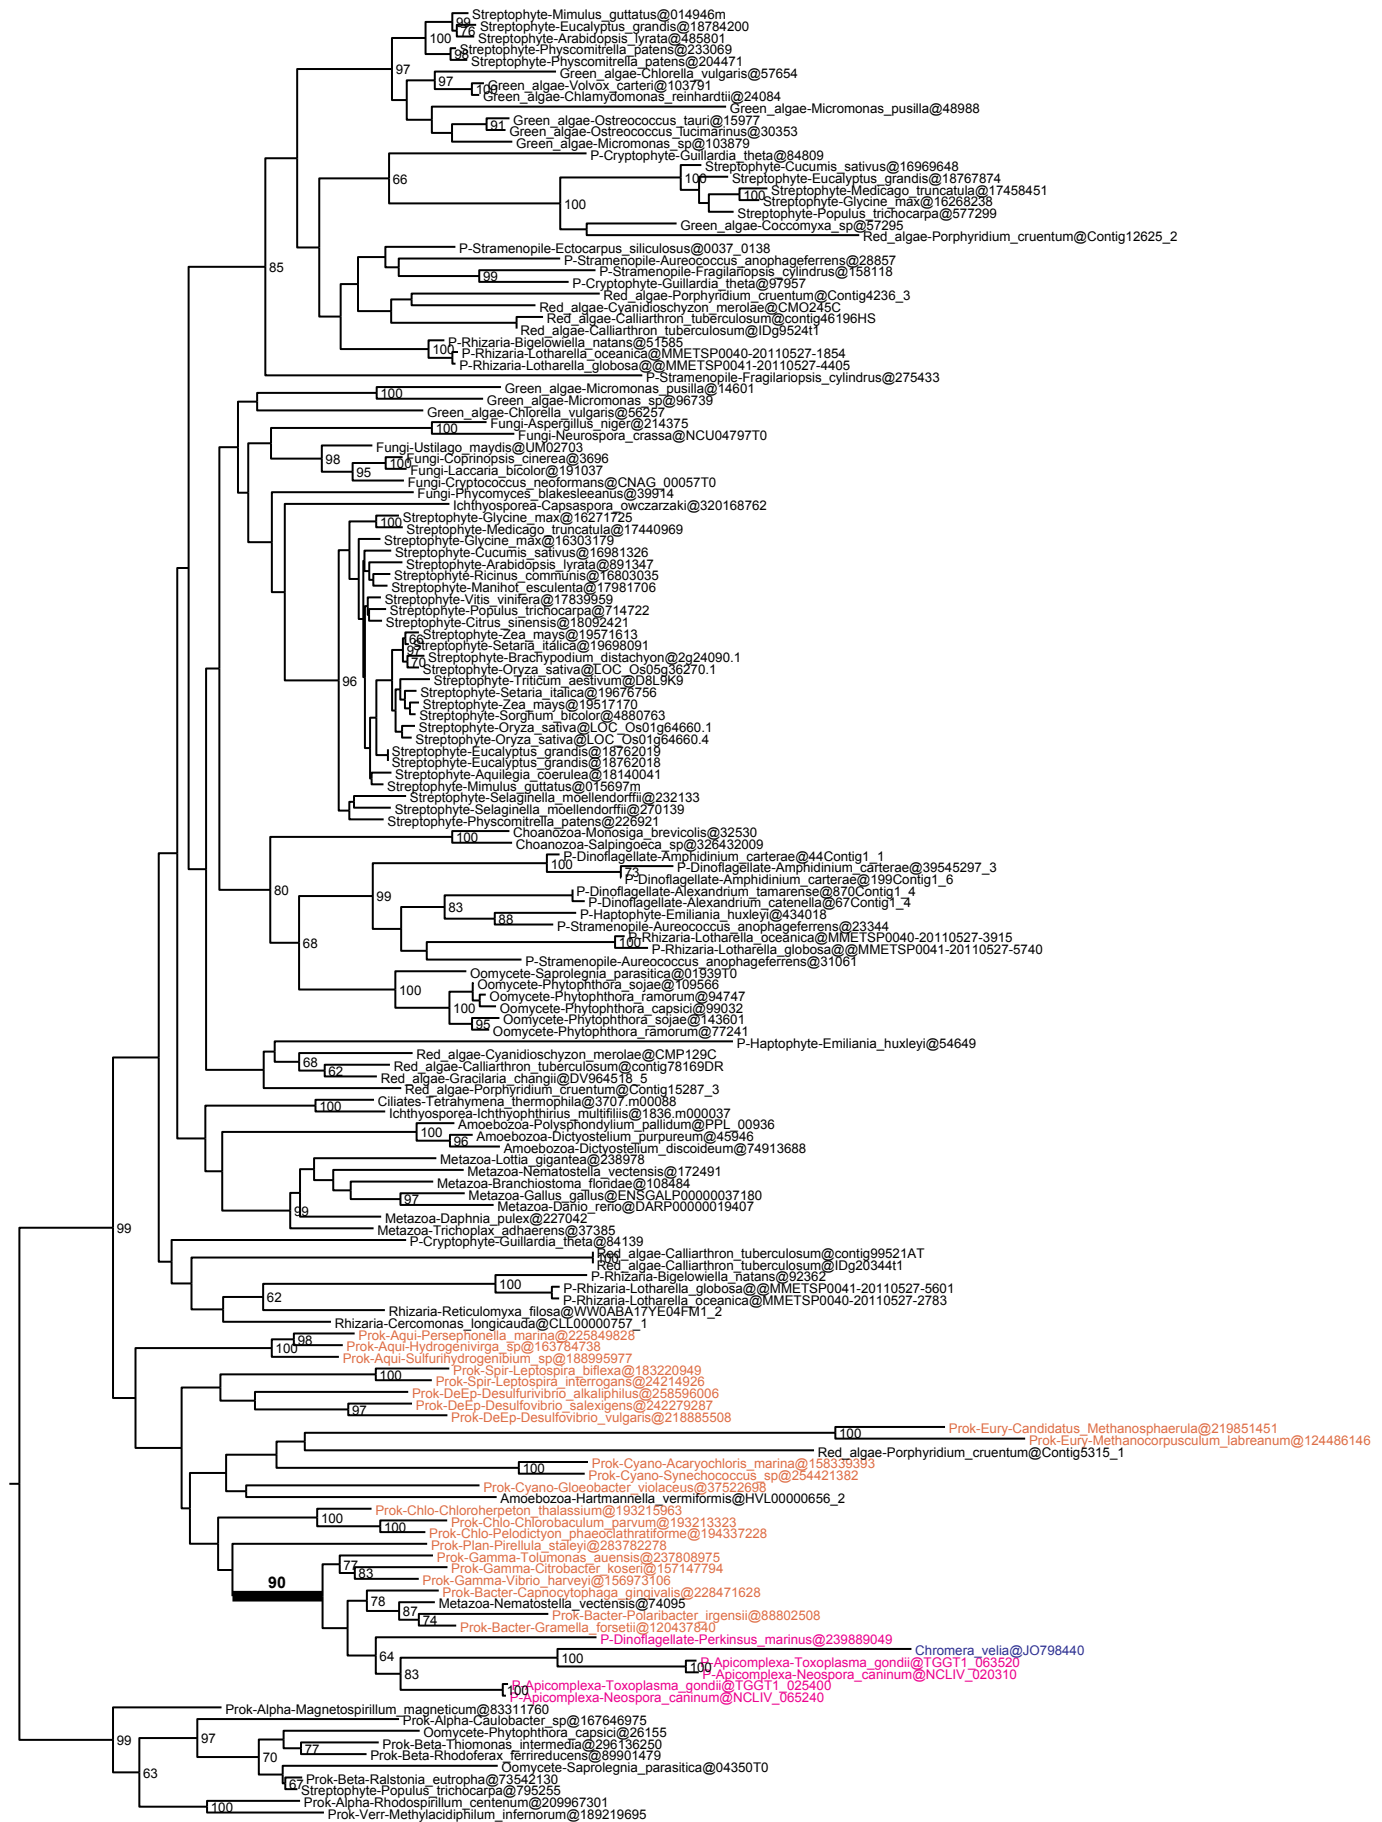

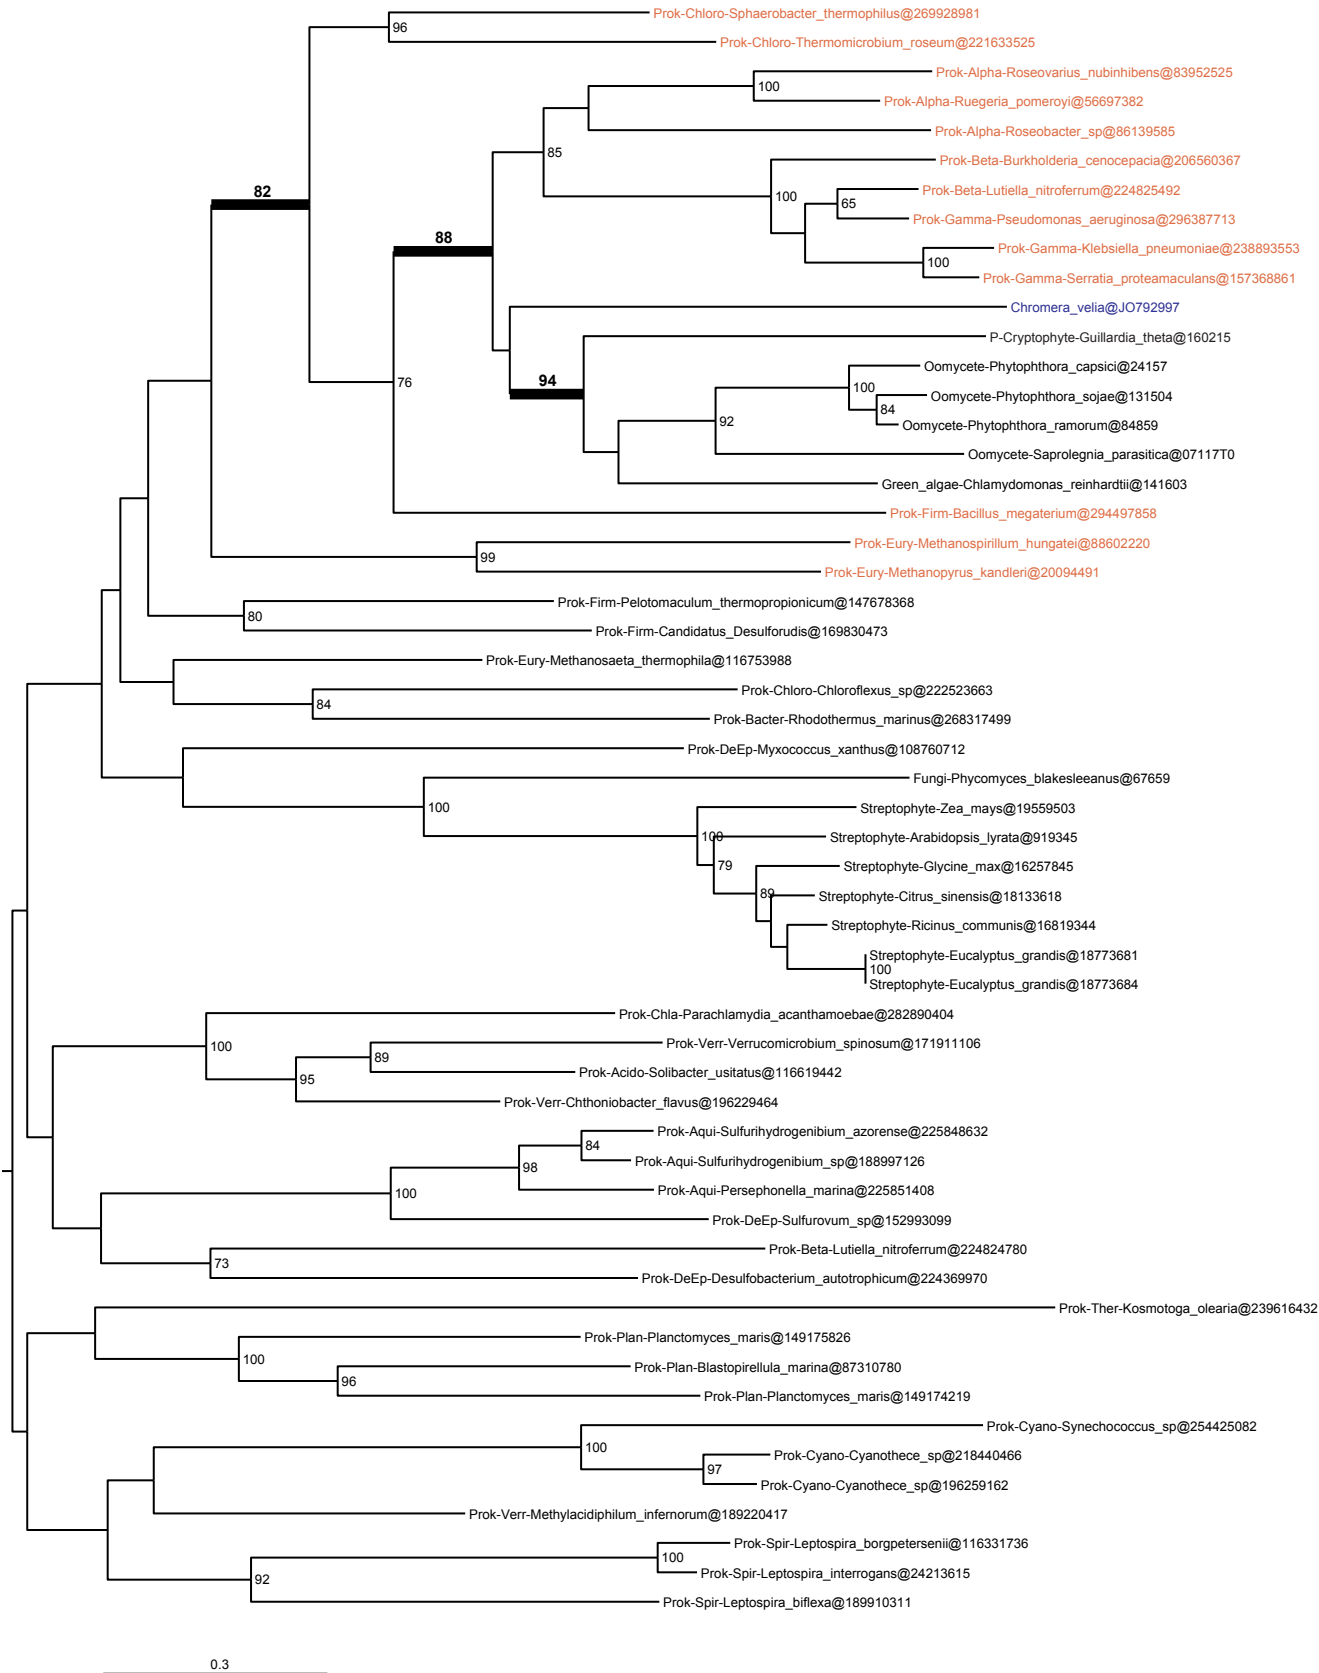

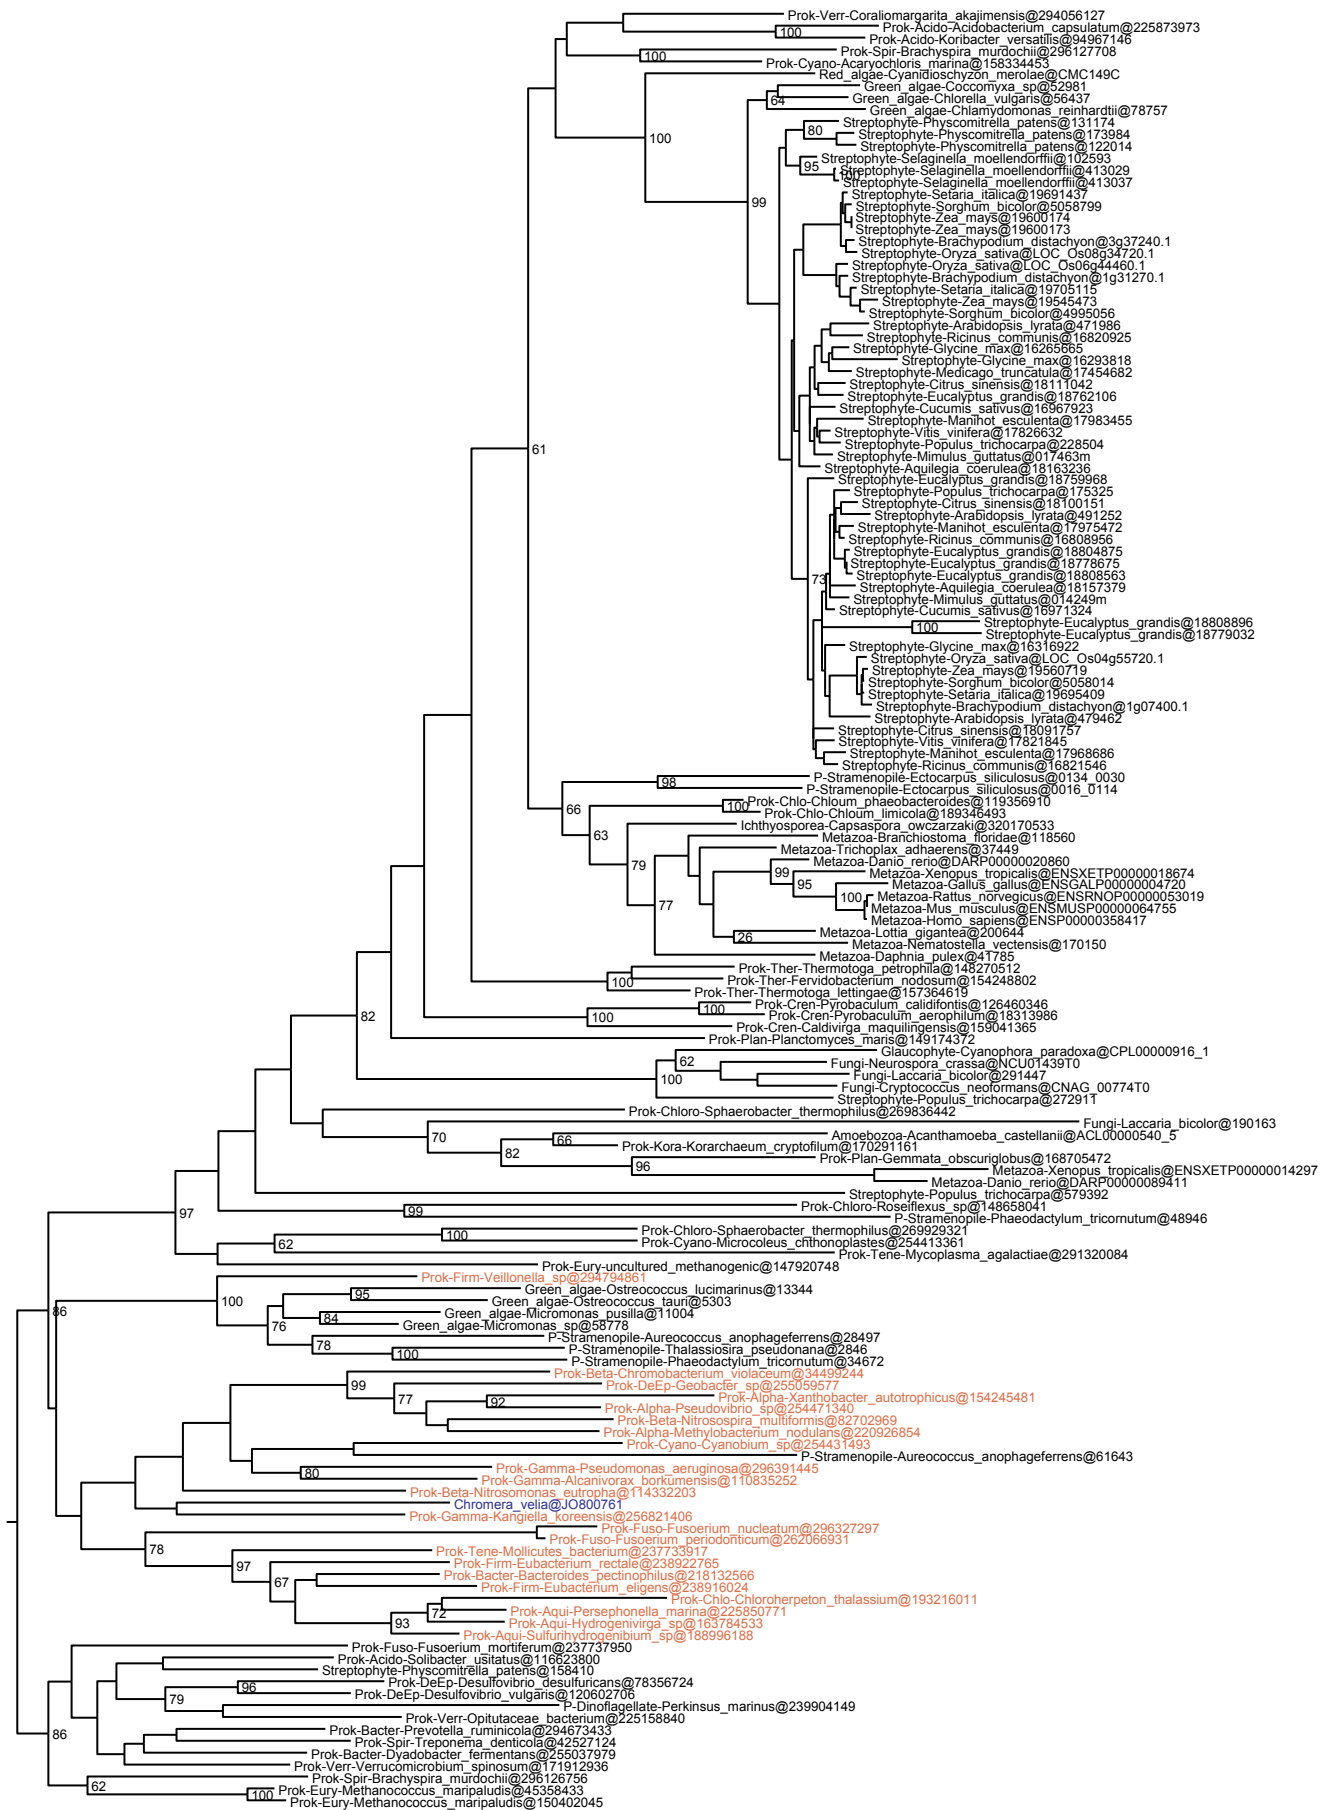

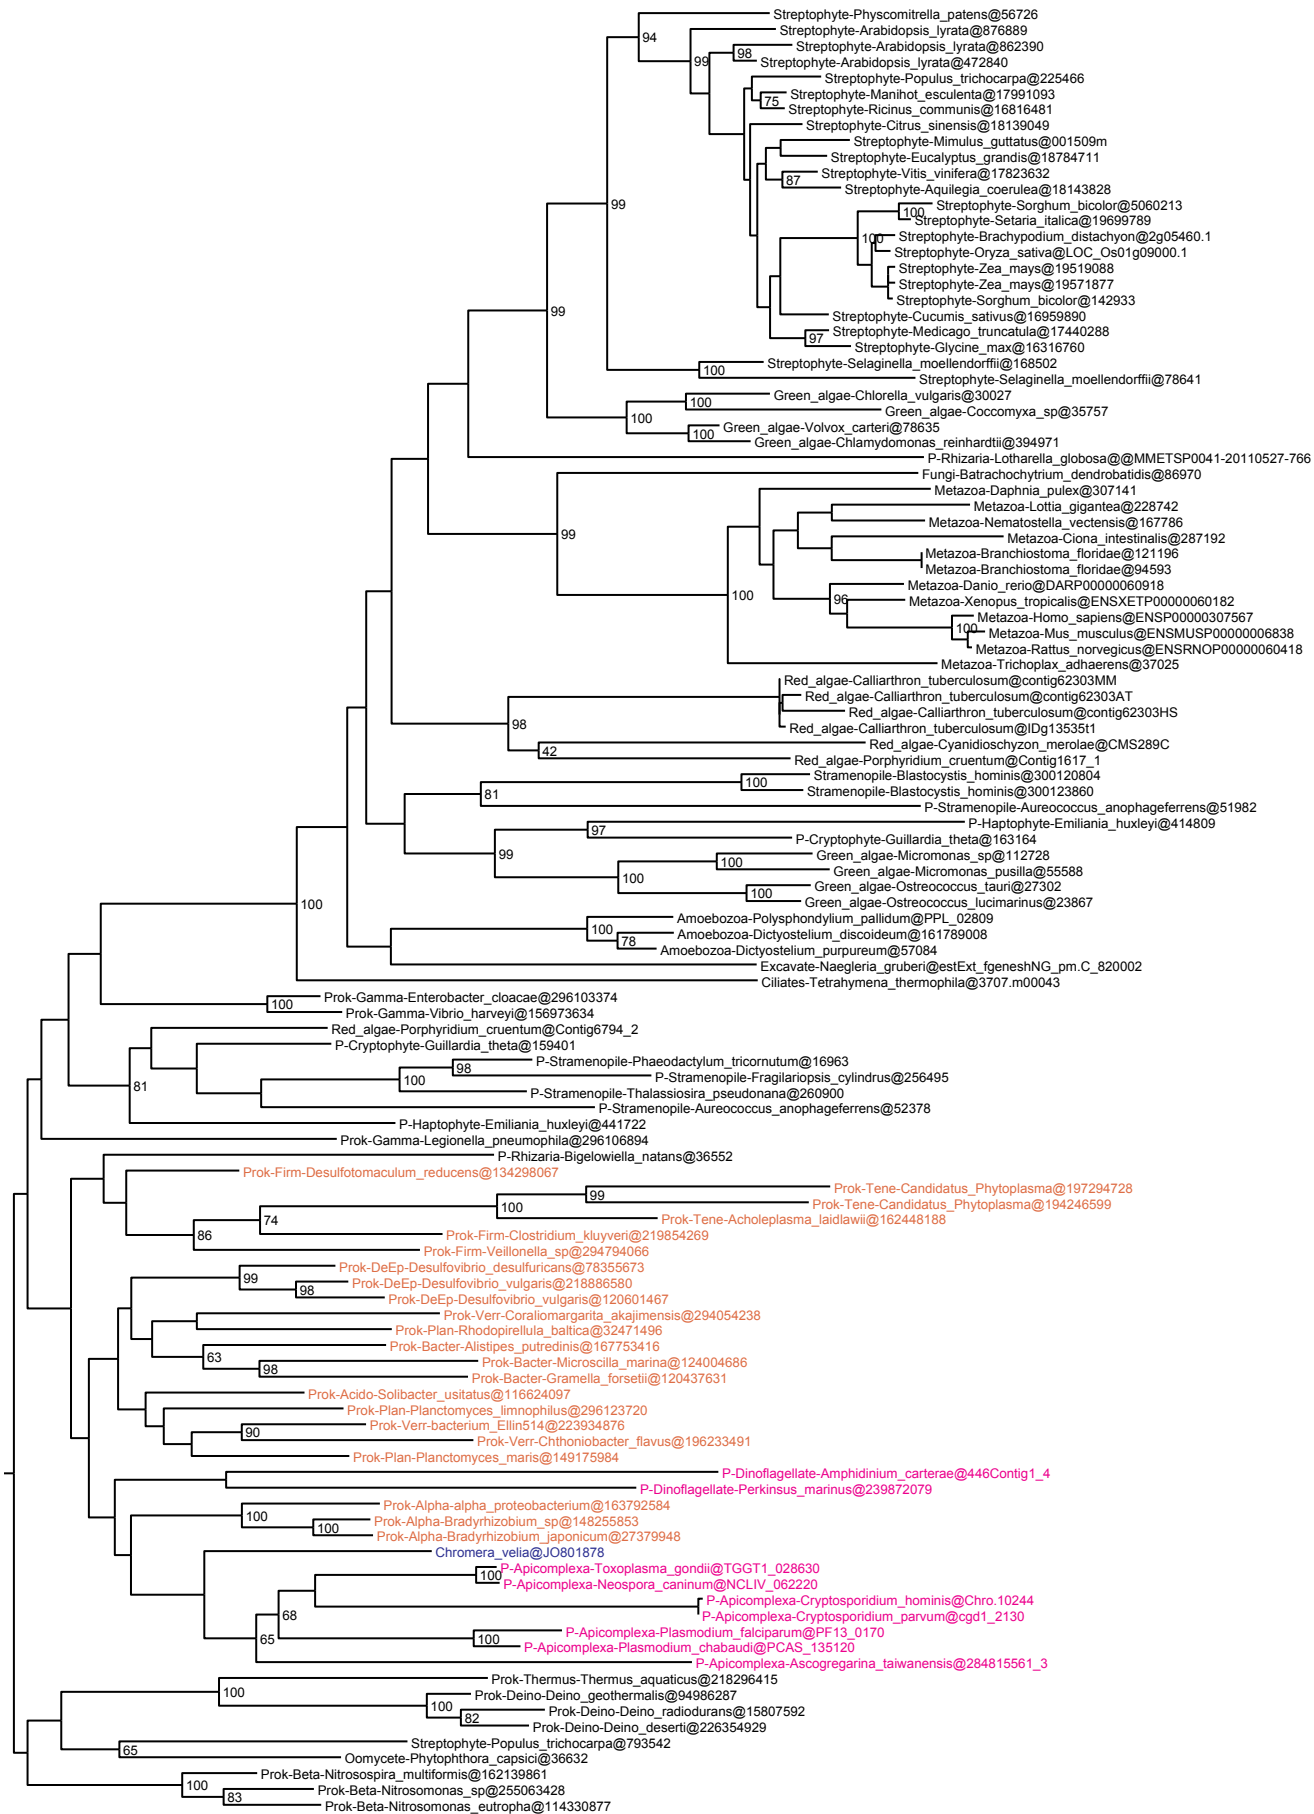

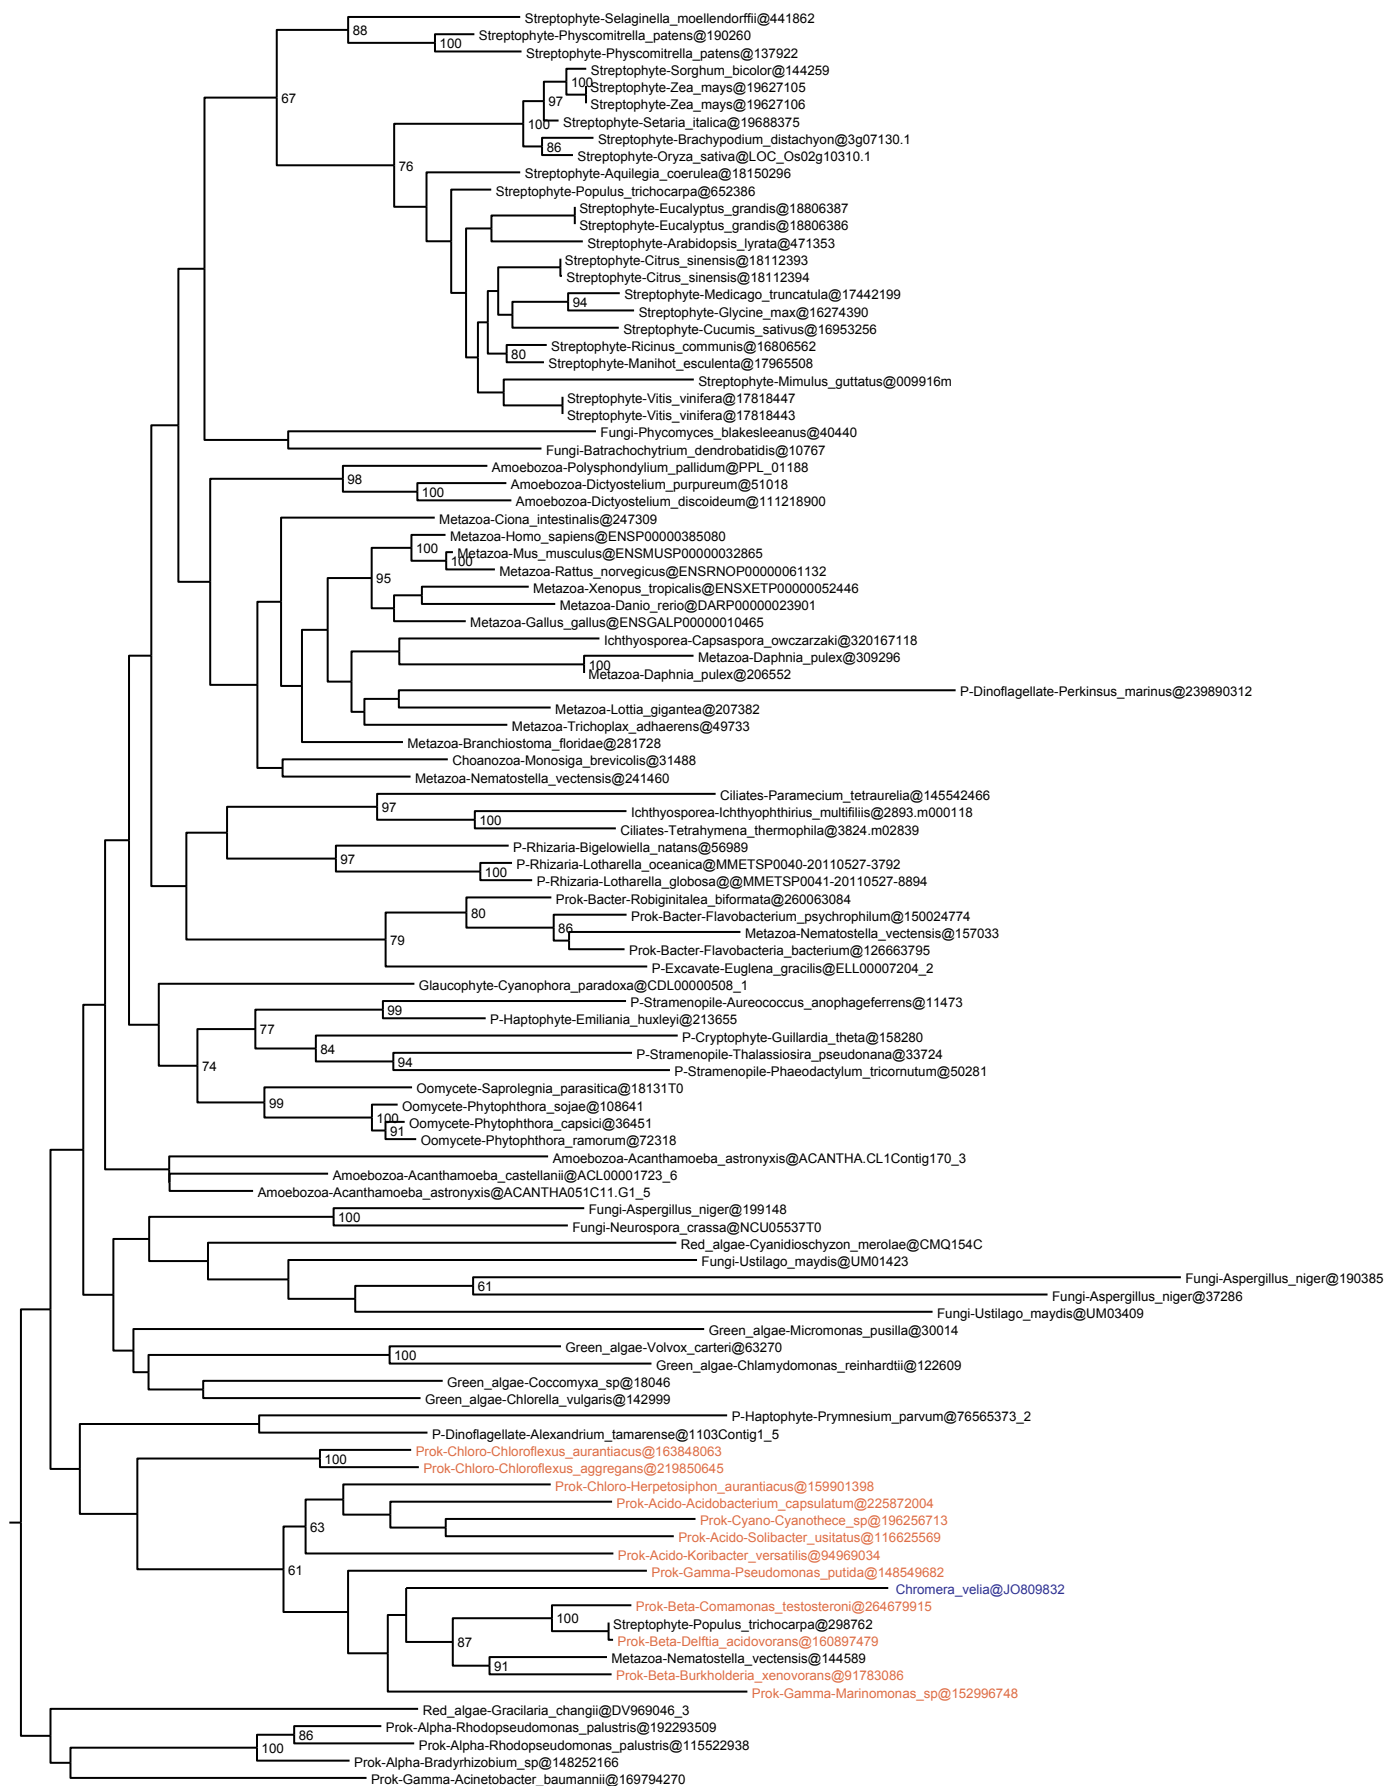

Supplement: evs049_Supplementary_Data.zip [file evs049_Supplementary_Data.zip › FigureS5.pdf]

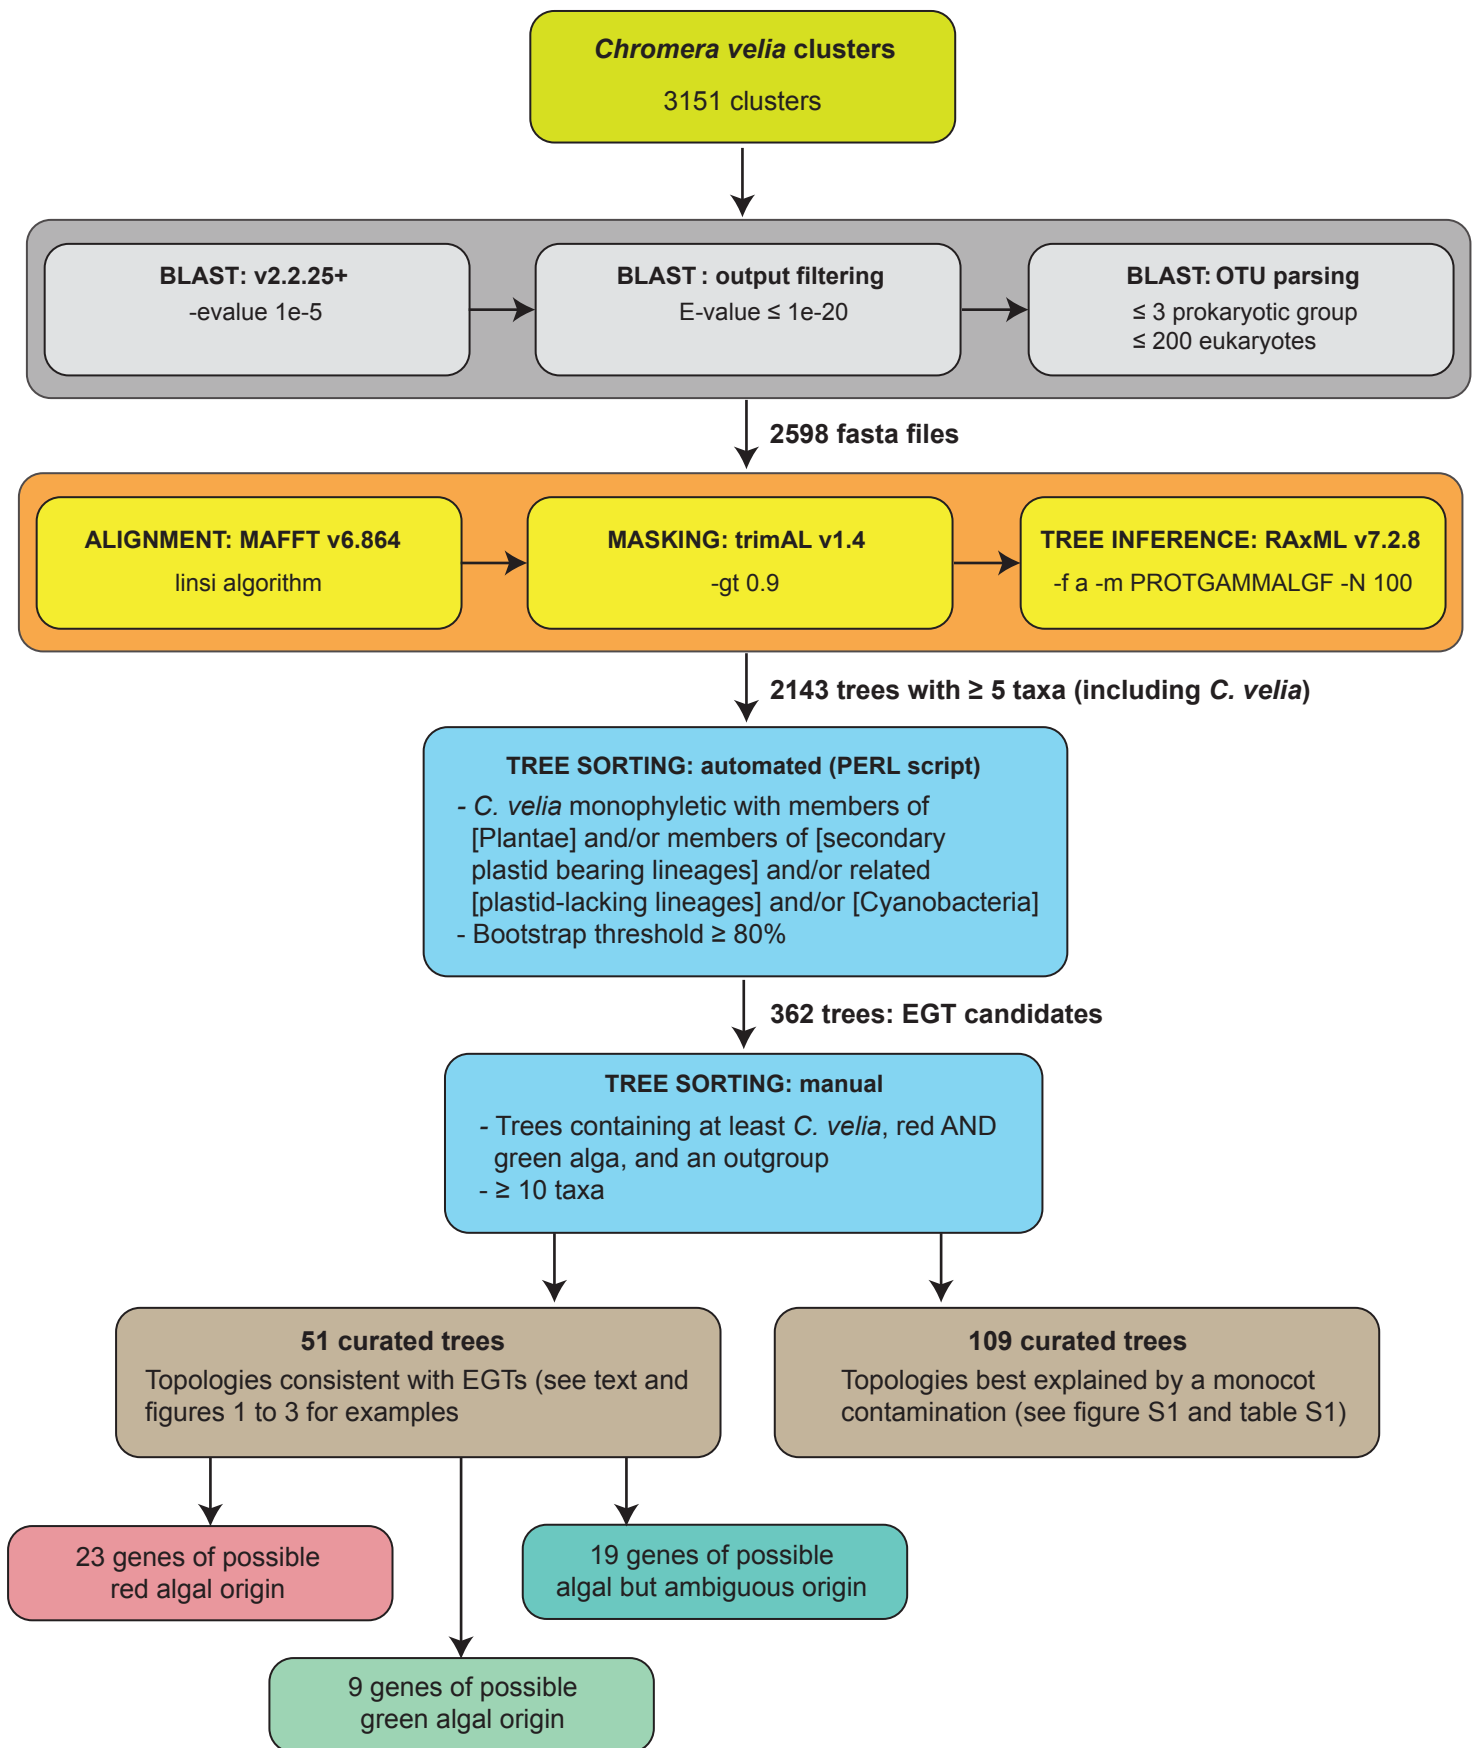

Supplement: evs049_Supplementary_Data.zip [file evs049_Supplementary_Data.zip › FigureS6.pdf]
